# Supplementary material
Source: publisher figshare collection journal article supplement (https://geolsoc.figshare.com/ndownloader/files/21113124)
Supplement: Supplementary file 1 [file 21113124]

## Sheet: YM1(Helix)
VUA Helix MC
Total fusion			36Ar(a) [fA]	37Ar(ca) [fA]	38Ar(cl) [fA]	39Ar(k) [fA]	40Ar(r) [fA]	Age	± 2s	40Ar(r)	39Ar(k)	K/Ca	± 2s			Relative Abundances			36Ar(a) [fA]	%1s	37Ar(ca) [fA]	%1s	38Ar(cl) [fA]	%1s	39Ar(k) [fA]	%1s	40Ar(r) [fA]	%1s	40(r)/39(k)	± 2s	Age	± 2s	40Ar(r)	39Ar(k)	K/Ca	± 2s
								(Ma)		(%)	(%)																				(Ma)		(%)	(%)
137_VU102-Y4	8	4	0.0107539	0.0898494	0.000559987	1.80972	188.678	717.515	8.00012	98.326	3.07809	8.66091	58.2443		137_VU102-Y4	8	4	0.0107779	4.38451	0.0898494	336.247	0.0245028	2.4647	1.80978	0.668762	191.89	0.0287537	104.258	1.40499	717.515	8.00012	98.326	3.07809	8.66091	58.2443
138_VU102-Y4	8	4	0.00814592	0.205938	0.000570759	0.497698	47.5722	667.448	19.0201	95.1355	0.84652	1.0392	2.809		138_VU102-Y4	8	4	0.0082006	5.62039	0.205938	135.142	0.00813339	4.72805	0.497837	1.67291	50.0047	0.054104	95.5844	3.25025	667.448	19.0201	95.1355	0.84652	1.0392	2.809
139_VU102-Y4	8	4	0.0795497	0.397815	0.00163675	0.536991	60.2446	762.128	22.5374	71.7237	0.913352	0.580435	0.711695		139_VU102-Y4	8	4	0.0796556	2.04993	0.397815	61.2857	0.0231348	2.56863	0.537259	1.61357	83.9954	0.0348954	112.189	4.05563	762.128	22.5374	71.7237	0.913352	0.580435	0.711695
140_VU102-Y4	8	4	0.0469123	0.0555422	0.00266777	1.50942	161.119	731.604	9.58499	92.0015	2.56733	11.6857	99.0684		140_VU102-Y4	8	4	0.0469285	2.07883	0.0555422	423.886	0.0297898	2.32209	1.50946	0.772726	175.126	0.0323065	106.742	1.69632	731.604	9.58499	92.0015	2.56733	11.6857	99.0684
141_VU102-Y4	8	4	0.0266032	0.129798	0.00144774	0.228991	17.9316	563.446	39.2404	69.3024	0.389483	0.758609	2.81295		141_VU102-Y4	8	4	0.0266382	2.76496	0.129798	185.362	0.00923552	3.94154	0.229078	3.8495	25.8744	0.0750059	78.3072	6.33541	563.446	39.2404	69.3024	0.389483	0.758609	2.81295
147_VU102-Y4	8	4	0.00831847	0.187972	0.00070475	1.66108	187.931	767.392	9.50245	98.695	2.82528	3.79985	9.94729		147_VU102-Y4	8	4	0.00836849	5.07621	0.187972	130.888	0.0223885	2.43199	1.66121	0.753633	190.416	0.0390888	113.138	1.7149	767.392	9.50245	98.695	2.82528	3.79985	9.94729
148_VU102-Y4	8	4	0.00722198	-0.4396	0.000606975	0.555497	55.9065	696.81	26.5918	96.2856	0.944828	-0.543366	0.942275		148_VU102-Y4	8	4	0.00710626	6.10661	-0.4396	86.6772	0.00869539	3.63114	0.555201	2.28213	58.0632	0.035061	100.642	4.61756	696.81	26.5918	96.2856	0.944828	-0.543366	0.942275
149_VU102-Y4	8	4	0.00360872	-0.310713	0	1.04829	114.765	747.001	18.6146	99.0692	1.783	-1.45074	2.20702		149_VU102-Y4	8	4	0.00352669	8.45844	-0.310713	76.05	0.0127186	3.65189	1.04808	1.51515	115.843	0.0285833	109.478	3.32216	747.001	18.6146	99.0692	1.783	-1.45074	2.20702
150_VU102-Y4	8	4	0.00605564	0.0565972	0.00129982	1.31201	143.33	745.691	12.8977	98.7535	2.23156	9.96808	82.3867		150_VU102-Y4	8	4	0.0060713	6.23966	0.0565972	413.251	0.0183298	2.76985	1.31205	1.04941	145.139	0.0218128	109.245	2.30021	745.691	12.8977	98.7535	2.23156	9.96808	82.3867
151_VU102-Y4	8	4	0.00508178	0.0698125	0.000236033	1.61488	180.965	761.416	10.1034	99.1678	2.7467	9.94661	62.5173		151_VU102-Y4	8	4	0.00510034	8.45247	0.0698125	314.263	0.0207501	1.93253	1.61492	0.807153	182.484	0.0279526	112.061	1.81741	761.416	10.1034	99.1678	2.7467	9.94661	62.5173
153_VU102-Y4	8	4	0.0130325	-0.196454	0.000394473	1.83284	208.449	770.67	9.22159	98.1668	3.11742	-4.01173	9.17533		153_VU102-Y4	8	4	0.0129808	4.33124	-0.196454	114.354	0.0250468	2.3845	1.83271	0.727988	212.341	0.0261963	113.73	1.66719	770.67	9.22159	98.1668	3.11742	-4.01173	9.17533
154_VU102-Y4	8	4	0.00844362	-0.0124438	0.000748533	0.99133	114.608	781.044	14.845	97.847	1.68612	-34.2558	1369.55		154_VU102-Y4	8	4	0.00844075	4.76893	-0.0124438	1999.01	0.0143452	3.55967	0.991322	1.16207	117.13	0.0255913	115.611	2.6991	781.044	14.845	97.847	1.68612	-34.2558	1369.55
155_VU102-Y4	8	4	0.00438352	-0.804123	0.000810338	2.06788	235.523	771.588	8.41228	99.4466	3.51719	-1.10579	0.558589		155_VU102-Y4	8	4	0.00417168	7.72624	-0.804123	25.2488	0.0266786	1.54794	2.06734	0.666606	236.834	0.0179394	113.896	1.52164	771.588	8.41228	99.4466	3.51719	-1.10579	0.558589
156_VU102-Y4	8	4	0.00314555	0.110817	0.00105332	0.304429	30.8101	700.055	43.1507	97.0412	0.517794	1.18127	5.71041		156_VU102-Y4	8	4	0.00317539	14.5009	0.110817	241.678	0.00533289	6.58184	0.304504	3.67918	31.7495	0.0415792	101.206	7.50624	700.055	43.1507	97.0412	0.517794	1.18127	5.71041
157_VU102-Y4	8	4	0.0180656	-0.155307	0.000794171	0.932773	100.06	734.593	14.2686	94.8845	1.58652	-2.58257	7.29263		157_VU102-Y4	8	4	0.0180251	3.6063	-0.155307	141.184	0.0154954	2.56482	0.932668	1.16212	105.454	0.0365073	107.271	2.52933	734.593	14.2686	94.8845	1.58652	-2.58257	7.29263
26_VU102-Y4	8	4	0.00834861	0.394812	0	0.331462	33.2781	695.402	36.2218	93.0311	0.563773	0.361003	0.309151		26_VU102-Y4	8	4	0.00845284	5.37544	0.394812	42.7057	0.00501226	4.92001	0.331727	3.10011	35.7709	0.0402138	100.398	6.28495	695.402	36.2218	93.0311	0.563773	0.361003	0.309151
27_VU102-Y4	8	4	0.00280058	7.58908e-05	0.000494241	0.203978	24.021	792.841	37.7131	96.6355	0.34694	1155.75	4.8432e+06		27_VU102-Y4	8	4	0.00280087	12.8331	7.58908e-05	209527	0.00349233	7.89155	0.203978	2.89387	24.8574	0.076496	117.763	6.90127	792.841	37.7131	96.6355	0.34694	1155.75	4.8432e+06
28_VU102-Y4	8	4	0.00332557	0.0633886	0	0.421584	44.5958	726.168	23.532	97.8213	0.71706	2.85984	16.0685		28_VU102-Y4	8	4	0.00334231	8.09961	0.0633886	280.926	0.00503119	3.51302	0.421627	1.95301	45.589	0.0478508	105.781	4.15228	726.168	23.532	97.8213	0.71706	2.85984	16.0685
29_VU102-Y4	8	4	0.00518391	0.262746	0	0.345546	36.9994	733.487	33.4509	95.9842	0.587728	0.565506	0.742713		29_VU102-Y4	8	4	0.00525328	7.53702	0.262746	65.6105	0.00488132	7.20397	0.345722	2.74639	38.5474	0.050998	107.075	5.92612	733.487	33.4509	95.9842	0.587728	0.565506	0.742713
35_VU102-Y4	8	4	0.0238093	0.273155	0.000542058	0.657437	72.2313	749.183	15.238	91.0398	1.11821	1.03493	1.86379		35_VU102-Y4	8	4	0.0238817	2.65194	0.273155	90.0358	0.0129917	2.43672	0.657621	1.20976	79.3404	0.0300658	109.868	2.72279	749.183	15.238	91.0398	1.11821	1.03493	1.86379
36_VU102-Y4	8	4	0.00762897	0.517468	0.00123062	2.70378	304.332	764.177	7.97257	99.2564	4.59877	2.24676	1.95155		36_VU102-Y4	8	4	0.00776624	4.47551	0.517468	43.4257	0.0354114	1.50756	2.70412	0.636598	306.612	0.0216262	112.558	1.43628	764.177	7.97257	99.2564	4.59877	2.24676	1.95155
37_VU102-Y4	80	4	0.00625291	0.03526	0.000565226	0.921177	100.51	744.935	10.6625	98.1757	1.5668	11.2339	120.85		37_VU102-Y4	80	4	0.00626253	5.70825	0.03526	537.884	0.0128994	2.67138	0.921201	0.863972	102.377	0.0228718	109.11	1.9008	744.935	10.6625	98.1757	1.5668	11.2339	120.85
38_VU102-Y4	8	4	0.00569361	0.35492	0.0019493	1.3441	156.529	785.69	12.3317	98.925	2.28614	1.62843	1.58093		38_VU102-Y4	8	4	0.00578836	6.42683	0.35492	48.532	0.0192996	2.58479	1.34434	0.961975	158.23	0.0220371	116.457	2.24783	785.69	12.3317	98.925	2.28614	1.62843	1.58093
39_VU102-Y4	8	4	0.00141324	-0.0909867	0.000555952	0.131023	15.1828	782.519	81.7694	97.2954	0.222852	-0.619208	2.54547		39_VU102-Y4	8	4	0.00138952	23.3986	-0.0909867	205.443	0.00240903	8.92166	0.130961	6.38915	15.6048	0.0857975	115.879	14.8792	782.519	81.7694	97.2954	0.222852	-0.619208	2.54547
41_VU102-Y4	8	4	0.0042379	0.276246	0.00041467	0.915315	93.0819	702.855	16.907	98.6581	1.55683	1.42476	2.13444		41_VU102-Y4	8	4	0.00431105	9.17927	0.276246	74.8911	0.012298	3.33184	0.915501	1.4419	94.3479	0.028322	101.694	2.94554	702.855	16.907	98.6581	1.55683	1.42476	2.13444
42_VU102-Y4	8	4	0.00324105	-0.0576615	0.000328474	0.815665	95.494	789.079	17.4579	98.9961	1.38734	-6.08268	49.3474		42_VU102-Y4	8	4	0.003226	10.6565	-0.0576615	405.637	0.0108171	3.37207	0.815627	1.35694	96.4623	0.0221095	117.075	3.18814	789.079	17.4579	98.9961	1.38734	-6.08268	49.3474
43_VU102-Y4	8	4	0.00762582	0.0332649	0	9.52919	1126.07	795.07	6.57365	99.7975	16.2079	123.179	1579.06		43_VU102-Y4	8	4	0.0076346	5.10804	0.0332649	640.959	0.116197	1.23999	9.52921	0.509293	1128.36	0.0142137	118.171	1.2044	795.07	6.57365	99.7975	16.2079	123.179	1579.06
44_VU102-Y4	8	4	0.0413579	0.284443	8.76387e-05	1.11983	106.489	664.576	11.1923	89.6087	1.90468	1.69288	2.63131		44_VU102-Y4	8	4	0.041433	2.432	0.284443	77.7113	0.0214447	1.96566	1.12002	0.962521	118.838	0.0279065	95.094	1.9096	664.576	11.1923	89.6087	1.90468	1.69288	2.63131
45_VU102-Y4	8	4	0.00445792	0.276058	0.000286982	0.702208	74.2762	726.133	17.9017	98.2389	1.19436	1.09379	1.66832		45_VU102-Y4	8	4	0.00453096	8.99181	0.276058	76.2488	0.00963104	4.43871	0.702393	1.48316	75.6077	0.0277692	105.775	3.15873	726.133	17.9017	98.2389	1.19436	1.09379	1.66832
47_VU102-Y4	8	4	0.00662561	-0.524794	0	0.729783	80.3786	750.706	18.4989	97.5973	1.24127	-0.597962	0.432341		47_VU102-Y4	8	4	0.00648707	7.45457	-0.524794	36.1205	0.00975567	3.98475	0.72943	1.49125	82.3573	0.0282671	110.14	3.3082	750.706	18.4989	97.5973	1.24127	-0.597962	0.432341
159_VU102-Y4	9	4	0.00378311	-0.818859	0	0.622123	73.195	792.245	28.5423	98.4796	1.05815	-0.32669	0.475844		159_VU102-Y4	9	4	0.00356693	9.19937	-0.818859	72.7911	0.00751476	3.79634	0.621572	2.09877	74.325	0.0228383	117.654	5.22137	792.245	28.5423	98.4796	1.05815	-0.32669	0.475844
160_VU102-Y4	9	4	0.00728251	-1.86899	0	0.916795	94.9817	713.775	14.209	97.7613	1.55935	-0.210928	0.163145		160_VU102-Y4	9	4	0.00678909	3.76723	-1.86899	38.6483	0.0119183	1.95761	0.915537	0.966119	97.1568	0.0270791	103.602	2.4903	713.775	14.209	97.7613	1.55935	-0.210928	0.163145
162_VU102-Y4	9	4	0.00603395	0.945034	0	0.692725	79.5842	777.052	22.4049	97.7858	1.17823	0.315197	0.595746		162_VU102-Y4	9	4	0.00628344	4.85156	0.945034	94.4848	0.00952577	2.53591	0.693361	1.61103	81.3863	0.0298405	114.886	4.06478	777.052	22.4049	97.7858	1.17823	0.315197	0.595746
163_VU102-Y4	9	4	0.0136567	-0.346489	0	1.09427	124.998	773.431	12.97	96.8404	1.86122	-1.35802	4.26558		163_VU102-Y4	9	4	0.0135653	2.02555	-0.346489	157.047	0.0155297	1.73247	1.09404	0.740964	129.077	0.034157	114.23	2.34841	773.431	12.97	96.8404	1.86122	-1.35802	4.26558
165_VU102-Y4	9	4	0.00545754	-0.248236	0	0.358722	35.5197	687.428	27.5577	95.6131	0.610139	-0.621386	3.36257		165_VU102-Y4	9	4	0.00539201	4.79839	-0.248236	270.559	0.00476862	2.72514	0.358555	2.27903	37.1494	0.0669072	99.0173	4.76084	687.428	27.5577	95.6131	0.610139	-0.621386	3.36257
166_VU102-Y4	9	4	0.00448194	-0.208488	4.36956e-05	0.393064	38.7822	685.395	21.9225	96.6639	0.668551	-0.810683	5.66323		166_VU102-Y4	9	4	0.00442693	4.38613	-0.208488	349.282	0.00564855	4.71628	0.392924	1.76477	40.1207	0.0559307	98.6664	3.7831	685.395	21.9225	96.6639	0.668551	-0.810683	5.66323
167_VU102-Y4	9	4	0.00337081	-0.86011	0	0.773682	91.2612	793.902	16.3944	98.9086	1.31593	-0.386792	0.675392		167_VU102-Y4	9	4	0.00314374	8.95628	-0.86011	87.2948	0.00952009	2.4008	0.773104	1.05029	92.2683	0.0248942	117.957	3.00181	793.902	16.3944	98.9086	1.31593	-0.386792	0.675392
168_VU102-Y4	9	4	0.0229587	-0.445799	0	0.841322	99.6951	796.856	14.0665	93.5662	1.43098	-0.811506	3.0525		168_VU102-Y4	9	4	0.022841	1.6776	-0.445799	188.072	0.0143958	2.31279	0.841022	0.814071	106.55	0.0210344	118.498	2.57973	796.856	14.0665	93.5662	1.43098	-0.811506	3.0525
169_VU102-Y4	9	4	0.00414156	-0.750532	0	1.87774	209.471	758.597	10.6687	99.4124	3.19379	-1.07581	1.91305		169_VU102-Y4	9	4	0.00394342	6.1812	-0.750532	88.9051	0.0221005	2.37778	1.87724	0.484661	210.709	0.0202917	111.555	1.91614	758.597	10.6687	99.4124	3.19379	-1.07581	1.91305
171_VU102-Y4	9	4	0.00809846	0.0777334	0	0.654864	73.5335	762.678	16.9819	96.8158	1.11384	3.62253	50.4724		171_VU102-Y4	9	4	0.00811898	4.03868	0.0777334	696.644	0.008831	2.63697	0.654916	1.15195	75.9519	0.0353303	112.288	3.05683	762.678	16.9819	96.8158	1.11384	3.62253	50.4724
173_VU102-Y4	9	4	0.00359486	0.975152	2.76253e-05	0.723545	80.4766	756.765	13.8871	98.6831	1.23065	0.319052	0.488074		173_VU102-Y4	9	4	0.00385231	7.57433	0.975152	76.4768	0.00946738	3.2968	0.724201	0.854659	81.5505	0.0312795	111.226	2.49169	756.765	13.8871	98.6831	1.23065	0.319052	0.488074
174_VU102-Y4	9	4	0.00331261	-0.601217	0	0.423368	46.0872	743.524	29.2192	97.8984	0.720094	-0.3028	0.731252		174_VU102-Y4	9	4	0.00315389	8.02129	-0.601217	120.723	0.00563493	2.33095	0.422964	2.2733	47.0766	0.0403739	108.858	5.20489	743.524	29.2192	97.8984	0.720094	-0.3028	0.731252
175_VU102-Y4	9	4	0.00391367	-0.493274	0	6.8504	808.055	793.904	9.2794	99.8549	11.6516	-5.97167	18.0518		175_VU102-Y4	9	4	0.00378344	12.381	-0.493274	151.142	0.0801433	0.79156	6.85007	0.134418	809.229	0.0147589	117.957	1.69906	793.904	9.2794	99.8549	11.6516	-5.97167	18.0518
181_VU102-Y4	9	4	0.00682666	-0.915472	2.22749e-05	0.534849	61.3992	776.564	30.1153	96.7864	0.909708	-0.25122	0.34364		181_VU102-Y4	9	4	0.00658499	5.33207	-0.915472	68.3493	0.00778612	4.49469	0.534233	2.26459	63.4378	0.0370726	114.797	5.46216	776.564	30.1153	96.7864	0.909708	-0.25122	0.34364
182_VU102-Y4	9	4	0.0123705	-1.34622	0.000214951	2.27804	249.679	747.695	9.9639	98.5416	3.87465	-0.727636	0.759417		182_VU102-Y4	9	4	0.0120152	3.79658	-1.34622	52.1728	0.0301339	1.05635	2.27714	0.392769	253.374	0.0232881	109.602	1.77894	747.695	9.9639	98.5416	3.87465	-0.727636	0.759417
183_VU102-Y4	9	4	0.00465605	-0.713818	0	1.1667	138.888	799.826	13.3076	99.0083	1.9844	-0.702812	1.3838		183_VU102-Y4	9	4	0.0044676	6.18024	-0.713818	98.4393	0.0148181	1.75122	1.16622	0.739752	140.279	0.0250233	119.043	2.44451	799.826	13.3076	99.0083	1.9844	-0.702812	1.3838
184_VU102-Y4	9	4	0.00320717	-1.28573	0	0.623862	71.8101	778.264	16.7505	98.6834	1.06111	-0.208645	0.201806		184_VU102-Y4	9	4	0.00286774	9.65968	-1.28573	48.3381	0.00762308	3.77135	0.622997	1.10669	72.7682	0.0326317	115.106	3.04095	778.264	16.7505	98.6834	1.06111	-0.208645	0.201806
185_VU102-Y4	9	4	0.00279911	-1.41468	0	0.191494	22.2069	783	67.3446	96.3726	0.325706	-0.0582055	0.055107		185_VU102-Y4	9	4	0.00242563	13.6837	-1.41468	47.0398	0.00264416	8.46905	0.190542	5.23342	23.0428	0.0626863	115.967	12.2576	783	67.3446	96.3726	0.325706	-0.0582055	0.055107
		S	0.501271	-8.8361	0.0202951	58.7935	6610.99										S	0.49895	0.685658	-8.8361	36.4644	0.814153	0.375466	58.7875	0.148302	6760.7	0.00451477
Information on Analysis				Results		40(r)/39(k)	± 2s	Age	± 2s	MSWD	39Ar(k)	K/Ca	± 2s		Information on Analysis and Constants Used in Calculations									Results		40(a)/36(a)	± 2s	40(r)/39(k)	± 2s	Age	± 2s	MSWD	39Ar(k)	K/Ca	± 2s
								(Ma)			(%,n)																			(Ma)			(%,n)
Sample = YM1(Y4)				Age Plateau Error Mean		110.975	1.807	755.366	11.8277	26.3756	100	-0.0815323	0.0603918		Sample = YM1(Y4)				Age Equations = Conventional					Age Plateau Error Mean				110.975	1.807	755.366	11.8277	26.3756	100	-0.0815323	0.0603918
Material = muscovite							0.016283		0.0156582	8.42131e-229	48				Material = muscovite				Negative Intensities = Allowed										0.016283		0.0156582	8.42131e-229	48
Location = China				Minimal External Error					18.9378	1.41257	2σ Confidence Limit				Location = China				Decay Constant 40K = 5.460 ± 0.053 E-10 1/a					Minimal External Error							18.9378	1.41257	2σ Confidence Limit
Analyst = Xilin Sun				Analytical Error					10.0788	5.13572	Error Magnification				Analyst = Xilin Sun				Decay Constant 39Ar = 2.940 ± 0.016 E-07 1/h					Analytical Error							10.0788	5.13572	Error Magnification
Project = VU102															Project = VU102				Decay Constant 37Ar = 8.230 ± 0.012 E-04 1/h
Mass Discrimination Law = EXP				Total Fusion Age		112.444	0.398757	763.544	6.62476		48	-2.86112	2.08669		Mass Discrimination Law = EXP				Decay Constant 36Cl = 2.257 ± 0.015 E-06 1/a					Total Fusion Age				112.444	0.398757	763.544	6.62476		48	-2.86112	2.08669
Irradiation = VU102							0.00354627		0.00867632						Irradiation = VU102				Atmospheric Ratio 40/36(a) = 298.56 ± 0.31										0.00354627		0.00867632
J = 0.00460000 ± 0.00002300				Minimal External Error					16.3522						J = 0.00460000 ± 0.00002300				Atmospheric Ratio 38/36(a) = 0.1885 ± 0.0003					Minimal External Error							16.3522
DRA = 25.520 ± 0.08 Ma				Analytical Error					2.21421						DRA = 25.520 ± 0.08 Ma				Production Ratio 39/37(ca) = 0.000673 ± 0.000004					Analytical Error							2.21421
															IGSN = Undefined				Production Ratio 36/37(ca) = 0.000264 ± 0.000002
															Preferred Age = Undefined				Production Ratio 40/39(k) = 0.000860 ± 0.000070					Normal Isochron No Convergence		195.858	105.158	113.896	2.1945	771.588	13.6689	18.0497	64.4993
															Classification = Undefined				Production Ratio 38/39(k) = 0.012110 ± 0.000030								0.53691		0.0192676		0.0177152	2.97768e-98	33
															Experiment Type = Undefined				Production Ratio 36/38(cl) = 262.80 ± 1.71					Minimal External Error							20.3735	1.508	2σ Confidence Limit
															Extraction Method = Undefined				Scaling Ratio K/Ca = 0.430					Analytical Error							12.1322	4.2485	Error Magnification
															Heating = 8 sec																100		Number of Iterations
															Isolation = 8.00 min																0.024086		Convergence
															Instrument = HELIX
															Lithology = Undefined									Inverse Isochron Error Chron		238.708	65.6877	112.309	2.13239	762.796	13.388	18.6425	64.4993
															Lat-Lon = Undefined - Undefined												0.27518		0.0189868		0.0175513	4.85366e-102	33
															Feature = Undefined									Minimal External Error							20.0577	1.508	2σ Confidence Limit
																								Analytical Error							11.8455	4.3177	Error Magnification
																															5		Number of Iterations
																															3.55082e-06		Convergence
																															0.376429		Spreading Factor

## Sheet: YM2(Helix)
VUA Helix MC
Total fusion			36Ar(a) [fA]	37Ar(ca) [fA]	38Ar(cl) [fA]	39Ar(k) [fA]	40Ar(r) [fA]	Age	± 2s	40Ar(r)	39Ar(k)	K/Ca	± 2s			Relative Abundances			36Ar(a) [fA]	%1s	37Ar(ca) [fA]	%1s	38Ar(cl) [fA]	%1s	39Ar(k) [fA]	%1s	40Ar(r) [fA]	%1s	40(r)/39(k)	± 2s	Age	± 2s	40Ar(r)	39Ar(k)	K/Ca	± 2s
								(Ma)		(%)	(%)																				(Ma)		(%)	(%)
100_VU102-Y1	8	4	0.00469054	-0.00790088	0	5.006	413.793	590.205	5.15892	99.6617	2.86058	-272.448	16184.3			100_VU102-Y1	8	4	0.00468845	10.3812	-0.00790088	2970.15	0.0607499	1.38361	5.006	0.509701	415.197	0.0174637	82.6593	0.845173	590.205	5.15892	99.6617	2.86058	-272.448	16184.3
101_VU102-Y1	8	4	0.0034959	-0.337771	0	4.74901	132.388	220.978	2.23387	99.2147	2.71373	-6.04575	8.73597			101_VU102-Y1	8	4	0.00340673	11.4778	-0.337771	72.2469	0.0572213	1.79275	4.74879	0.52851	133.436	0.0242682	27.877	0.299153	220.978	2.23387	99.2147	2.71373	-6.04575	8.73597
103_VU102-Y1	8	4	0.00228339	0.443233	0	2.76869	71.6532	206.003	2.59369	99.0543	1.58211	2.68603	3.43682			103_VU102-Y1	8	4	0.00240041	14.9019	0.443233	63.9726	0.0330126	1.47616	2.76898	0.647191	72.3373	0.0285796	25.8799	0.344509	206.003	2.59369	99.0543	1.58211	2.68603	3.43682
104_VU102-Y1	8	4	0.00186824	0.32622	0	2.77037	282.466	704.381	7.78199	99.8021	1.58307	3.6517	4.97137			104_VU102-Y1	8	4	0.00195437	16.0778	0.32622	68.066	0.0319431	1.46093	2.77058	0.664229	283.026	0.0183308	101.96	1.35691	704.381	7.78199	99.8021	1.58307	3.6517	4.97137
105_VU102-Y1	8	4	0.00297371	0.56155	0	2.59271	69.5013	212.966	2.38858	98.7356	1.48155	1.98534	1.73024			105_VU102-Y1	8	4	0.00312196	12.3417	0.56155	43.5717	0.0301349	2.1165	2.59309	0.568822	70.3914	0.0312808	26.8064	0.318473	212.966	2.38858	98.7356	1.48155	1.98534	1.73024
106_VU102-Y1	8	4	0.00526028	0.454012	0.000219097	3.55669	409.902	779.047	7.31094	99.6176	2.0324	3.36859	3.23888			106_VU102-Y1	8	4	0.00538026	6.88404	0.454012	48.0713	0.0442822	1.74298	3.557	0.5751	411.476	0.0171958	115.248	1.32782	779.047	7.31094	99.6176	2.0324	3.36859	3.23888
107_VU102-Y1	8	4	0.00221726	0.314836	0	2.43213	83.9496	269.901	3.01161	99.2152	1.38979	3.32178	5.20568			107_VU102-Y1	8	4	0.00230038	15.6861	0.314836	78.3547	0.0285445	1.86117	2.43234	0.584854	84.6137	0.0292108	34.5169	0.414222	269.901	3.01161	99.2152	1.38979	3.32178	5.20568
109_VU102-Y1	8	4	0.00364897	0.26664	0	5.22993	149.101	225.692	2.43702	99.2717	2.98854	8.43411	18.7564			109_VU102-Y1	8	4	0.00371936	10.0693	0.26664	111.192	0.0626894	1.37128	5.23011	0.567991	150.195	0.0277693	28.5091	0.327199	225.692	2.43702	99.2717	2.98854	8.43411	18.7564
110_VU102-Y1	8	4	0.00208544	0.14709	0.000332502	3.97385	471.493	797.677	7.33539	99.8674	2.27078	11.6171	37.1254			110_VU102-Y1	8	4	0.00212445	15.6276	0.14709	159.787	0.0488489	1.74109	3.97395	0.566396	472.119	0.0196773	118.649	1.34588	797.677	7.33539	99.8674	2.27078	11.6171	37.1254
111_VU102-Y1	8	4	0.00633383	0.161859	0	3.53473	82.0393	185.788	2.12172	97.7434	2.01985	9.39046	22.4743			111_VU102-Y1	8	4	0.00637656	5.47361	0.161859	119.664	0.0434927	1.75982	3.53484	0.585614	83.9334	0.0321885	23.2095	0.278726	185.788	2.12172	97.7434	2.01985	9.39046	22.4743
112_VU102-Y1	8	4	0.00200362	0.058722	0.000629449	2.67703	62.0893	185.665	2.49514	99.0421	1.52973	19.6029	161.211			112_VU102-Y1	8	4	0.00201947	13.9776	0.058722	411.192	0.0334259	1.76587	2.67706	0.691501	62.6898	0.0404472	23.1934	0.32776	185.665	2.49514	99.0421	1.52973	19.6029	161.211
113_VU102-Y1	8	4	0.00587651	0.0768727	0	3.77311	390.521	713.199	6.76923	99.5519	2.15607	21.1055	166.762			113_VU102-Y1	8	4	0.00589681	5.04796	0.0768727	395.066	0.0460621	1.26547	3.77316	0.572016	392.278	0.0217056	103.501	1.18602	713.199	6.76923	99.5519	2.15607	21.1055	166.762
48_VU102-Y1	8	4	0.010443	-0.230013	0	5.84015	679.19	784.812	6.64937	99.5423	3.33724	-10.9179	18.4538			48_VU102-Y1	8	4	0.0103822	3.85879	-0.230013	84.5102	0.0719971	1.39606	5.84	0.520258	682.313	0.0176571	116.297	1.21147	784.812	6.64937	99.5423	3.33724	-10.9179	18.4538
49_VU102-Y1	8	4	0.00527892	-0.0960844	0	5.76169	250.273	333.636	3.20561	99.3722	3.2924	-25.7849	103.115			49_VU102-Y1	8	4	0.00525355	6.91635	-0.0960844	199.952	0.0687083	1.30047	5.76162	0.523287	251.854	0.0197365	43.4375	0.456518	333.636	3.20561	99.3722	3.2924	-25.7849	103.115
50_VU102-Y1	8	4	0.00156464	-0.284445	0	1.12408	33.212	233.397	5.60523	98.6101	0.642336	-1.6993	2.76711			50_VU102-Y1	8	4	0.00148955	19.522	-0.284445	81.4097	0.0135449	2.31013	1.12389	1.24964	33.6801	0.0543175	29.5459	0.75574	233.397	5.60523	98.6101	0.642336	-1.6993	2.76711
51_VU102-Y1	8	4	0.00210346	-0.402172	0.000119527	2.15375	223.098	713.683	8.43267	99.7185	1.23072	-2.30278	2.40225			51_VU102-Y1	8	4	0.00199735	16.006	-0.402172	52.155	0.026598	1.52591	2.15348	0.711787	223.728	0.0205511	103.586	1.47785	713.683	8.43267	99.7185	1.23072	-2.30278	2.40225
53_VU102-Y1	8	4	0.01111	-0.284247	0	7.882	800.412	702.025	5.91293	99.5865	4.50402	-11.9237	15.8945			53_VU102-Y1	8	4	0.0110349	4.32379	-0.284247	66.649	0.0945595	1.25955	7.88181	0.506468	803.736	0.0146591	101.549	1.02969	702.025	5.91293	99.5865	4.50402	-11.9237	15.8945
54_VU102-Y1	8	4	0.00292564	-0.376666	0	1.99175	157.747	568.969	7.10444	99.4483	1.13814	-2.27377	2.2166			54_VU102-Y1	8	4	0.0028262	13.8506	-0.376666	48.7374	0.0243407	2.13924	1.99149	0.722207	158.622	0.0215531	79.2003	1.15049	568.969	7.10444	99.4483	1.13814	-2.27377	2.2166
55_VU102-Y1	8	4	0.00393351	-0.340786	0	5.55407	643.964	782.878	7.16371	99.8172	3.17377	-7.00806	8.90077			55_VU102-Y1	8	4	0.00384354	10.0719	-0.340786	63.5013	0.0678146	1.2964	5.55384	0.561687	645.143	0.0180437	115.944	1.3038	782.878	7.16371	99.8172	3.17377	-7.00806	8.90077
56_VU102-Y1	8	4	0.00269795	-0.360581	0	4.74067	128.739	215.588	2.11694	99.3751	2.70897	-5.65334	5.89188			56_VU102-Y1	8	4	0.00260276	10.7482	-0.360581	52.1071	0.0574364	1.26462	4.74043	0.5156	129.549	0.0259977	27.1563	0.282661	215.588	2.11694	99.3751	2.70897	-5.65334	5.89188
57_VU102-Y1	8	4	0.015397	-0.221229	0	7.54356	199.912	210.673	2.06114	97.7491	4.31062	-14.6623	22.885			57_VU102-Y1	8	4	0.0153386	3.41311	-0.221229	78.0385	0.0918368	1.17981	7.54341	0.511401	204.515	0.0214999	26.501	0.274472	210.673	2.06114	97.7491	4.31062	-14.6623	22.885
63_VU102-Y1	8	4	0.00248737	0.215737	0	1.97063	202.147	707.931	8.34111	99.6331	1.12608	3.9278	7.17092			63_VU102-Y1	8	4	0.00254432	13.3202	0.215737	91.2813	0.0241975	2.42546	1.97078	0.70799	202.891	0.0240188	102.579	1.45723	707.931	8.34111	99.6331	1.12608	3.9278	7.17092
64_VU102-Y1	8	4	0.000526252	0.359163	4.40003e-05	0.839973	14.7399	142.176	3.65159	98.9405	0.479986	1.00564	1.33571			64_VU102-Y1	8	4	0.000621095	45.4621	0.359163	66.4	0.0103153	3.122	0.840215	1.19499	14.8977	0.0926426	17.548	0.468414	142.176	3.65159	98.9405	0.479986	1.00564	1.33571
65_VU102-Y1	8	4	0.000884296	0.102288	0	1.39374	23.6724	137.781	2.85329	98.8921	0.796425	5.85902	21.6104			65_VU102-Y1	8	4	0.0009113	43.7107	0.102288	184.418	0.016974	2.69745	1.39381	0.946696	23.9377	0.0506843	16.9848	0.365134	137.781	2.85329	98.8921	0.796425	5.85902	21.6104
66_VU102-Y1	8	4	2.57568e-05	0.123077	0.000336573	0.88902	14.7598	134.789	4.28309	99.9428	0.508013	3.10602	10.6744			66_VU102-Y1	8	4	5.84305e-05	541.817	0.123077	171.827	0.0111075	3.66206	0.889103	1.50954	14.7682	0.116752	16.6023	0.54721	134.789	4.28309	99.9428	0.508013	3.10602	10.6744
67_VU102-Y1	8	4	0.00281442	-0.395179	0	2.37955	191.811	577.642	6.58973	99.5628	1.35975	-2.58923	2.10391			67_VU102-Y1	8	4	0.00271009	11.079	-0.395179	40.6227	0.0282584	1.88114	2.37929	0.66313	192.653	0.0205771	80.608	1.0722	577.642	6.58973	99.5628	1.35975	-2.58923	2.10391
69_VU102-Y1	8	4	0.00266724	-0.490598	0	0.680534	74.4234	746.339	21.2155	98.9406	0.388878	-0.596476	0.558379			69_VU102-Y1	8	4	0.00253772	15.5285	-0.490598	46.7748	0.00860821	2.59087	0.680204	1.72354	75.2203	0.0287143	109.36	3.78498	746.339	21.2155	98.9406	0.388878	-0.596476	0.558379
97_VU102-Y1	8	4	0.00101512	-0.316191	0	2.81845	289.982	709.692	7.84877	99.8948	1.61055	-3.83291	7.87907			97_VU102-Y1	8	4	0.000931642	43.4738	-0.316191	102.78	0.0339009	1.60517	2.81823	0.665348	290.287	0.0199993	102.887	1.37253	709.692	7.84877	99.8948	1.61055	-3.83291	7.87907
98_VU102-Y1	8	4	0.00138167	-0.367662	0	1.71381	583.113	1725.29	18.7367	99.9291	0.979323	-2.00439	2.42487			98_VU102-Y1	8	4	0.00128461	23.8722	-0.367662	60.483	0.0204467	2.13751	1.71356	0.838134	583.527	0.0142423	340.244	5.70475	1725.29	18.7367	99.9291	0.979323	-2.00439	2.42487
99_VU102-Y1	8	4	0.0019181	0.0690105	0	4.33689	129.965	236.52	2.4075	99.5585	2.47823	27.0229	181.002			99_VU102-Y1	8	4	0.00193632	20.9982	0.0690105	334.905	0.0513882	1.24954	4.33694	0.533662	130.541	0.0240169	29.9673	0.325151	236.52	2.4075	99.5585	2.47823	27.0229	181.002
147_VU102-Y1	9	4	0.00283488	-0.450608	0	2.96124	70.799	191.102	3.33573	98.8151	1.69214	-2.82581	8.35704			147_VU102-Y1	9	4	0.00271592	8.91055	-0.450608	147.865	0.0360215	1.40775	2.96094	0.572392	71.6479	0.0313647	23.9086	0.439481	191.102	3.33573	98.8151	1.69214	-2.82581	8.35704
149_VU102-Y1	9	4	0.00171575	-1.38102	0	1.09045	126.333	782.381	14.5052	99.5954	0.623116	-0.339527	0.30811			149_VU102-Y1	9	4	0.00135116	21.9709	-1.38102	45.3537	0.0122243	2.91476	1.08952	0.888819	126.846	0.0283758	115.854	2.63924	782.381	14.5052	99.5954	0.623116	-0.339527	0.30811
150_VU102-Y1	9	4	0.00162553	-1.26135	0	2.19583	752.08	1732.69	21.6802	99.9353	1.25476	-0.74857	0.667144			150_VU102-Y1	9	4	0.00129254	28.0635	-1.26135	44.5451	0.0268314	1.64727	2.19498	0.660086	752.567	0.0143604	342.504	6.62768	1732.69	21.6802	99.9353	1.25476	-0.74857	0.667144
151_VU102-Y1	9	4	0.000412853	-0.649166	0	2.19845	53.1336	193.075	3.5088	99.765	1.25626	-1.45623	3.21029			151_VU102-Y1	9	4	0.000241473	108.013	-0.649166	110.22	0.0253351	1.48044	2.19801	0.617754	53.2588	0.0437215	24.1687	0.462782	193.075	3.5088	99.765	1.25626	-1.45623	3.21029
153_VU102-Y1	9	4	0.000932172	-0.841944	0	2.12557	54.4241	203.929	3.92586	99.4879	1.21462	-1.08558	1.79207			153_VU102-Y1	9	4	0.000709899	31.1912	-0.841944	82.5306	0.0251648	1.94511	2.125	0.712966	54.7042	0.0338222	25.6045	0.520866	203.929	3.92586	99.4879	1.21462	-1.08558	1.79207
154_VU102-Y1	9	4	0.00471275	-1.75803	0	1.66417	49.6725	235.638	4.80741	97.2427	0.95096	-0.407044	0.255027			154_VU102-Y1	9	4	0.00424863	6.16818	-1.75803	31.3004	0.0201314	1.95535	1.66299	0.805233	51.081	0.036294	29.8481	0.648966	235.638	4.80741	97.2427	0.95096	-0.407044	0.255027
155_VU102-Y1	9	4	0.0103192	-2.84703	0	7.05259	834.957	796.266	11.2186	99.6316	4.03006	-1.06518	0.444305			155_VU102-Y1	9	4	0.00956759	6.71119	-2.84703	20.8258	0.0859814	1.22382	7.05067	0.503445	838.044	0.0252168	118.39	2.05679	796.266	11.2186	99.6316	4.03006	-1.06518	0.444305
156_VU102-Y1	9	4	0.00185553	-1.16256	0	2.95229	68.8598	186.661	3.26398	99.1983	1.68703	-1.09197	1.16762			156_VU102-Y1	9	4	0.00154862	17.3654	-1.16256	53.4513	0.0348198	1.60726	2.95151	0.570139	69.4163	0.043866	23.3242	0.428987	186.661	3.26398	99.1983	1.68703	-1.09197	1.16762
157_VU102-Y1	9	4	0.00516697	0.351739	0	4.3017	522.369	812.79	11.6229	99.7048	2.45812	5.25881	19.8579			157_VU102-Y1	9	4	0.00525983	7.63469	0.351739	188.803	0.0516956	1.64185	4.30193	0.531808	523.915	0.016073	121.433	2.15022	812.79	11.6229	99.7048	2.45812	5.25881	19.8579
30_VU102-Y1	8	4	0.0221988	-0.00064732	0.000420184	1.36544	16.1173	96.8396	2.74456	70.8572	0.780252	-907.027	1.27398e+06			30_VU102-Y1	8	4	0.0221989	2.39087	-0.00064732	70228.2	0.0211401	1.45715	1.36544	0.771735	22.7461	0.0365579	11.8038	0.343455	96.8396	2.74456	70.8572	0.780252	-907.027	1.27398e+06
32_VU102-Y1	8	4	0.0146603	-0.974065	0.00044669	4.93724	1710.46	1745.52	19.4608	99.7445	2.82129	-2.17954	1.67667			32_VU102-Y1	8	4	0.0144034	2.76172	-0.974065	38.4477	0.0630002	1.06034	4.93659	0.497407	1714.84	0.0143797	346.44	5.99103	1745.52	19.4608	99.7445	2.82129	-2.17954	1.67667
33_VU102-Y1	8	4	0.00217065	-1.01324	0	3.30425	76.0033	184.205	3.11843	99.1508	1.88815	-1.40226	0.866769			33_VU102-Y1	8	4	0.00190316	18.4044	-1.01324	30.8857	0.0402215	1.30871	3.30357	0.520734	76.6542	0.0231925	23.0017	0.409308	184.205	3.11843	99.1508	1.88815	-1.40226	0.866769
34_VU102-Y1	8	4	0.00231578	-0.903748	0	3.12885	71.9403	184.135	3.11021	99.0444	1.78792	-1.4887	1.1657			34_VU102-Y1	8	4	0.00207719	15.8163	-0.903748	39.1356	0.0375862	1.19739	3.12825	0.517084	72.6344	0.0243756	22.9925	0.408214	184.135	3.11021	99.0444	1.78792	-1.4887	1.1657
35_VU102-Y1	8	4	0.00289024	-1.06123	0	3.60069	370.809	710.237	10.2206	99.767	2.05755	-1.45896	0.839285			35_VU102-Y1	8	4	0.00261007	10.25	-1.06123	28.7413	0.0438866	1.08041	3.59998	0.502806	371.675	0.0145224	102.983	1.78782	710.237	10.2206	99.767	2.05755	-1.45896	0.839285
39_VU102-Y1	8	4	0.00223039	-1.20008	0	2.56233	70.085	217.054	3.77145	99.0557	1.46419	-0.918105	0.466139			39_VU102-Y1	8	4	0.00191356	9.48914	-1.20008	25.3595	0.0307812	1.37748	2.56152	0.584245	70.7531	0.0200664	27.3521	0.503979	217.054	3.77145	99.0557	1.46419	-0.918105	0.466139
40_VU102-Y1	8	4	0.0016936	-0.647459	0	0.0931123	11.3025	812.533	115.174	95.7172	0.0532072	-0.0618391	0.0654643			40_VU102-Y1	8	4	0.00152267	16.0083	-0.647459	52.1984	0.00133861	12.1315	0.0926766	8.75717	11.8082	0.0649671	121.386	21.304	812.533	115.174	95.7172	0.0532072	-0.0618391	0.0654643
41_VU102-Y1	8	4	0.00783145	-0.676847	0.000195974	6.90493	768.893	757.482	10.6726	99.6961	3.94569	-4.38669	4.11636			41_VU102-Y1	8	4	0.00765288	3.97367	-0.676847	46.9055	0.0852909	1.05783	6.90448	0.489468	771.238	0.0138487	111.354	1.91568	757.482	10.6726	99.6961	3.94569	-4.38669	4.11636
42_VU102-Y1	8	4	0.00273673	-0.726807	0	1.49069	758.589	2209.22	24.2008	99.8922	0.851824	-0.881934	0.868359			42_VU102-Y1	8	4	0.00254485	10.4694	-0.726807	49.2163	0.0175765	1.70259	1.4902	0.62353	759.407	0.0133812	508.885	9.59676	2209.22	24.2008	99.8922	0.851824	-0.881934	0.868359
48_VU102-Y1	8	4	0.00125217	-0.299482	0	2.03449	210.35	712.576	10.8303	99.8218	1.16257	-2.92115	7.34593			48_VU102-Y1	8	4	0.00117311	19.2892	-0.299482	125.732	0.0243163	1.34266	2.03429	0.583068	210.725	0.0147646	103.392	1.8969	712.576	10.8303	99.8218	1.16257	-2.92115	7.34593
49_VU102-Y1	8	4	0.00133726	-0.865506	0.000220064	0.862594	45.9935	401.747	7.07121	99.1378	0.492913	-0.428553	0.380306			49_VU102-Y1	8	4	0.00110891	19.6234	-0.865506	44.3547	0.0109182	2.26054	0.862012	0.659682	46.3935	0.0286587	53.3199	1.04518	401.747	7.07121	99.1378	0.492913	-0.428553	0.380306
50_VU102-Y1	8	4	0.00500286	-0.850508	0	4.86512	115.457	189.757	3.13703	98.7193	2.78008	-2.45971	2.33238			50_VU102-Y1	8	4	0.00477833	6.8182	-0.850508	47.3984	0.0586648	1.03317	4.86455	0.499072	116.955	0.0159059	23.7315	0.413	189.757	3.13703	98.7193	2.78008	-2.45971	2.33238
51_VU102-Y1	8	4	0.00204324	-0.989113	0	5.86365	260.349	340.385	5.35503	99.7643	3.35067	-2.54912	2.1899			51_VU102-Y1	8	4	0.00178212	13.6641	-0.989113	42.9395	0.0703921	1.00244	5.86299	0.491804	260.964	0.0144969	44.4004	0.765439	340.385	5.35503	99.7643	3.35067	-2.54912	2.1899
53_VU102-Y1	8	4	0.00260166	-0.837276	0.000603056	3.56228	55.4251	126.604	2.15835	98.6125	2.0356	-1.82948	1.4711			53_VU102-Y1	8	4	0.00238099	11.4838	-0.837276	40.1897	0.0442327	1.07046	3.56172	0.503912	56.2049	0.0200786	15.5589	0.274523	126.604	2.15835	98.6125	2.0356	-1.82948	1.4711
54_VU102-Y1	8	4	0.000763294	-0.852726	8.22881e-05	1.20285	28.6636	190.503	3.74657	99.2077	0.687345	-0.606555	0.432588			54_VU102-Y1	8	4	0.000538225	62.2445	-0.852726	35.6392	0.0147927	2.13338	1.20228	0.664134	28.8925	0.0473597	23.8297	0.493448	190.503	3.74657	99.2077	0.687345	-0.606555	0.432588
		S	0.213216	-22.7299	0.00364941	174.999	14363.1											S	0.207217	1.24133	-22.7299	11.7435	2.12478	0.21819	174.984	0.0866813	14426.9	0.00352734
Information on Analysis				Results		40(r)/39(k)	± 2s	Age	± 2s	MSWD	39Ar(k)	K/Ca	± 2s			Information on Analysis and Constants Used in Calculations									Results		40(a)/36(a)	± 2s	40(r)/39(k)	± 2s	Age	± 2s	MSWD	39Ar(k)	K/Ca	± 2s
								(Ma)			(%,n)																				(Ma)			(%,n)
Sample = YM2(Y1)				Age Plateau Error Mean		28.8742	5.36505	228.409	39.9582	5937.68	100	-0.183777	0.101666			Sample = YM2(Y1)				Age Equations = Conventional					Age Plateau Error Mean				28.8742	5.36505	228.409	39.9582	5937.68	100	-0.183777	0.101666
Material = muscovite							0.185808		0.174941	0	54					Material = muscovite				Negative Intensities = Allowed										0.185808		0.174941	0	54
Location = China				Minimal External Error					40.2077	1.38851	2σ Confidence Limit					Location = China				Decay Constant 40K = 5.460 ± 0.053 E-10 1/a					Minimal External Error							40.2077	1.38851	2σ Confidence Limit
Analyst = Xilin Sun				Analytical Error					39.9005	77.0563	Error Magnification					Analyst = Xilin Sun				Decay Constant 39Ar = 2.940 ± 0.016 E-07 1/h					Analytical Error							39.9005	77.0563	Error Magnification
Project = VU102																Project = VU102				Decay Constant 37Ar = 8.230 ± 0.012 E-04 1/h
Mass Discrimination Law = EXP				Total Fusion Age		82.0752	0.182871	586.637	5.14271		54	-3.3106	0.77767			Mass Discrimination Law = EXP				Decay Constant 36Cl = 2.257 ± 0.015 E-06 1/a					Total Fusion Age				82.0752	0.182871	586.637	5.14271		54	-3.3106	0.77767
Irradiation = VU102							0.00222809		0.00876643							Irradiation = VU102				Atmospheric Ratio 40/36(a) = 298.56 ± 0.31										0.00222809		0.00876643
J = 0.00460000 ± 0.00002300				Minimal External Error					12.5851							J = 0.00460000 ± 0.00002300				Atmospheric Ratio 38/36(a) = 0.1885 ± 0.0003					Minimal External Error							12.5851
DRA = 25.520 ± 0.08 Ma				Analytical Error					1.11842							DRA = 25.520 ± 0.08Ma				Production Ratio 39/37(ca) = 0.000673 ± 0.000004					Analytical Error							1.11842
																IGSN = Undefined				Production Ratio 36/37(ca) = 0.000264 ± 0.000002
																Preferred Age = Undefined				Production Ratio 40/39(k) = 0.000860 ± 0.000070					Normal Isochron No Convergence		132.07	318.319	15.2084	3.06808	123.846	24.1879	> 100	100
																Classification = Undefined				Production Ratio 38/39(k) = 0.012110 ± 0.000030								2.41023		0.201736		0.195306	0	54
																Experiment Type = Undefined				Production Ratio 36/38(cl) = 262.80 ± 1.71					Minimal External Error							24.3091	1.39223	2σ Confidence Limit
																Extraction Method = Undefined				Scaling Ratio K/Ca = 0.430					Analytical Error							24.1582	> 10	Error Magnification
																Heating = 8 sec																100		Number of Iterations
																Isolation = 8.00 min																0.00124065		Convergence
																Instrument = HELIX
																Lithology = Undefined									Inverse Isochron Error Chron		272883	204706	-207.657	155.85	-5688.68	29325	55.774	100
																Lat-Lon = Undefined - Undefined												0.750162		0.750516		5.15496	0	54
																Feature = Undefined									Minimal External Error							29325.2	1.39223	2σ Confidence Limit
																									Analytical Error							29322.4	7.4682	Error Magnification
																																5		Number of Iterations
																																0.00145999		Convergence
																																12.756		Spreading Factor

## Sheet: YM3(Helix)
	VUA Helix MC
	Total fusion			36Ar(a) [fA]	37Ar(ca) [fA]	38Ar(cl) [fA]	39Ar(k) [fA]	40Ar(r) [fA]	Age	± 2s	40Ar(r)	39Ar(k)	K/Ca	± 2s			Relative Abundances			36Ar(a) [fA]	%1s	37Ar(ca) [fA]	%1s	38Ar(cl) [fA]	%1s	39Ar(k) [fA]	%1s	40Ar(r) [fA]	%1s	40(r)/39(k)	± 2s	Age	± 2s	40Ar(r)	39Ar(k)	K/Ca	± 2s
									(Ma)		(%)	(%)																				(Ma)		(%)	(%)
	10_VU102-Y3	8	4	0.00818692	-0.165046	0	5.58299	496.952	628.576	5.83834	99.5096	6.34388	-14.5455	29.3888			10_VU102-Y3	8	4	0.00814335	4.20915	-0.165046	101.022	0.0686017	1.1965	5.58288	0.547985	499.401	0.0174748	89.0118	0.976731	628.576	5.83834	99.5096	6.34388	-14.5455	29.3888
	11_VU102-Y3	8	4	0.00616512	-0.00766246	0	7.48897	785.676	721.229	6.06018	99.7655	8.50964	-420.265	19171.3			11_VU102-Y3	8	4	0.0061631	7.07483	-0.00766246	2280.86	0.0899834	1.30768	7.48897	0.507763	787.523	0.0151156	104.911	1.06645	721.229	6.06018	99.7655	8.50964	-420.265	19171.3
	13_VU102-Y3	8	4	0.0123069	-0.540401	0	20.284	2150.75	727.586	5.83581	99.8286	23.0485	-16.1401	13.2512			13_VU102-Y3	8	4	0.0121643	3.81679	-0.540401	41.0475	0.242032	1.13058	20.2837	0.485727	2154.44	0.0137844	106.032	1.03054	727.586	5.83581	99.8286	23.0485	-16.1401	13.2512
	14_VU102-Y3	8	4	0.0155486	-0.373961	0	6.01643	631.07	721.116	5.9995	99.269	6.8364	-6.91801	6.12719			14_VU102-Y3	8	4	0.0154499	2.98696	-0.373961	44.2815	0.0756208	1.39993	6.01618	0.502564	635.717	0.0145915	104.891	1.05571	721.116	5.9995	99.269	6.8364	-6.91801	6.12719
	15_VU102-Y3	8	4	0.00218176	-0.194756	0	4.56965	480.246	722.273	6.16151	99.8637	5.19244	-10.0893	16.2906			15_VU102-Y3	8	4	0.00213035	18.2812	-0.194756	80.7308	0.0554754	1.2802	4.56952	0.515391	480.902	0.0142823	105.095	1.0849	722.273	6.16151	99.8637	5.19244	-10.0893	16.2906
	16_VU102-Y3	8	4	0.000915307	-0.180591	0	1.75672	184.652	722.372	8.64943	99.8514	1.99614	-4.18286	10.1227			16_VU102-Y3	8	4	0.000867631	26.4504	-0.180591	121	0.0211929	2.94841	1.7566	0.723212	184.927	0.0196268	105.112	1.52305	722.372	8.64943	99.8514	1.99614	-4.18286	10.1227
	17_VU102-Y3	8	4	0.00317388	-0.00247281	0	5.54986	127.262	183.664	1.85893	99.2572	6.30625	-965.073	177820			17_VU102-Y3	8	4	0.00317323	11.5941	-0.00247281	9212.78	0.067296	1.30324	5.54986	0.524236	128.214	0.0199282	22.9306	0.243921	183.664	1.85893	99.2572	6.30625	-965.073	177820
	19_VU102-Y3	8	4	0.00378874	-0.267059	0	1.90174	44.6793	187.952	2.96892	97.5273	2.16092	-3.06204	3.88379			19_VU102-Y3	8	4	0.00371823	9.65983	-0.267059	63.4133	0.0231404	2.00705	1.90156	0.793991	45.8121	0.0409371	23.494	0.390482	187.952	2.96892	97.5273	2.16092	-3.06204	3.88379
	20_VU102-Y3	8	4	0.00783742	-0.372276	0	6.68132	184.086	218.552	2.12936	98.7418	7.59191	-7.71731	6.9762			20_VU102-Y3	8	4	0.00773914	4.27353	-0.372276	45.1955	0.0800789	1.17724	6.68107	0.513524	186.432	0.0211099	27.5524	0.284779	218.552	2.12936	98.7418	7.59191	-7.71731	6.9762
	21_VU102-Y3	8	4	0.00706163	-0.383438	0	5.43418	657.95	810.859	6.94146	99.6799	6.1748	-6.09408	4.58226			21_VU102-Y3	8	4	0.0069604	6.24795	-0.383438	37.5923	0.0669559	1.23714	5.43393	0.529167	660.063	0.0157295	121.076	1.2828	810.859	6.94146	99.6799	6.1748	-6.09408	4.58226
	22_VU102-Y3	8	4	0.0031647	-0.290361	0	6.56115	763.311	785.038	6.53935	99.8756	7.45537	-9.71651	11.5123			22_VU102-Y3	8	4	0.00308805	11.854	-0.290361	59.2388	0.0786552	1.31988	6.56096	0.511697	764.261	0.0153347	116.338	1.19158	785.038	6.53935	99.8756	7.45537	-9.71651	11.5123
	23_VU102-Y3	8	4	0.00365657	-0.0449285	0	2.39268	252.265	724.188	8.5303	99.5683	2.71877	-22.8997	169.305			23_VU102-Y3	8	4	0.00364471	8.51363	-0.0449285	369.665	0.0290622	1.62274	2.39265	0.711909	253.359	0.0154024	105.432	1.50356	724.188	8.5303	99.5683	2.71877	-22.8997	169.305
	25_VU102-Y3	8	4	0.00184972	-0.040245	0	0.741787	17.3369	187.023	4.88104	96.9095	0.842884	-7.92568	79.7201			25_VU102-Y3	8	4	0.0018391	18.2694	-0.040245	502.922	0.00908107	3.30036	0.74176	1.23912	17.8898	0.0709651	23.3718	0.641645	187.023	4.88104	96.9095	0.842884	-7.92568	79.7201
	7_VU102-Y3	8	4	0.00777267	-0.123962	0.000415167	2.66127	316.388	798.97	8.65895	99.2712	3.02397	-9.2314	26.0689			7_VU102-Y3	8	4	0.00774016	5.23354	-0.123962	141.195	0.0341083	1.55434	2.66118	0.667297	318.711	0.017929	118.886	1.58985	798.97	8.65895	99.2712	3.02397	-9.2314	26.0689
	8_VU102-Y3	8	4	0.0171365	-0.0230083	0	7.03683	734.931	718.554	6.07656	99.3078	7.99586	-131.511	1926.55			8_VU102-Y3	8	4	0.0171304	3.33444	-0.0230083	732.468	0.0883379	1.20419	7.03681	0.510435	740.053	0.0148929	104.441	1.06777	718.554	6.07656	99.3078	7.99586	-131.511	1926.55
	9_VU102-Y3	8	4	0.0113269	-0.367445	0.000336147	3.34619	345.45	711.69	6.63007	99.0297	3.80224	-3.91586	2.84086			9_VU102-Y3	8	4	0.0112301	4.36553	-0.367445	36.2695	0.0429936	1.8787	3.34594	0.560326	348.834	0.0164428	103.237	1.16068	711.69	6.63007	99.0297	3.80224	-3.91586	2.84086
			S	0.112073	-3.37761	0.000751314	88.0058	8173.01											S	0.111182	1.44392	-3.37761	21.1857	1.07262	0.390859	88.0035	0.161725	8206.54	0.00505474
	Information on Analysis				Results		40(r)/39(k)	± 2s	Age	± 2s	MSWD	39Ar(k)	K/Ca	± 2s			Information on Analysis and Constants Used in Calculations									Results		40(a)/36(a)	± 2s	40(r)/39(k)	± 2s	Age	± 2s	MSWD	39Ar(k)	K/Ca	± 2s
									(Ma)			(%,n)																				(Ma)			(%,n)
	Sample = YM3(Y3)				Age Plateau Error Mean		39.7838	16.4894	307.799	117.466	12763.5	100	-5.07898	1.78286			Sample = YM3(Y3)				Age Equations = Conventional					Age Plateau Error Mean				39.7838	16.4894	307.799	117.466	12763.5	100	-5.07898	1.78286
	Material = muscovite							0.414477		0.381631	0	16					Material = muscovite				Negative Intensities = Allowed										0.414477		0.381631	0	16
	Location = China				Minimal External Error					117.62	1.7303	2σ Confidence Limit					Location = China				Decay Constant 40K = 5.460 ± 0.053 E-10 1/a					Minimal External Error							117.62	1.7303	2σ Confidence Limit
	Analyst = Xilin Sun				Analytical Error					117.431	112.976	Error Magnification					Analyst = Xilin Sun				Decay Constant 39Ar = 2.940 ± 0.016 E-07 1/h					Analytical Error							117.431	112.976	Error Magnification
	Project = VU102																Project = VU102				Decay Constant 37Ar = 8.230 ± 0.012 E-04 1/h
	Mass Discrimination Law = EXP				Total Fusion Age		92.869	0.300727	651.488	5.76242		16	-11.2039	4.74739			Mass Discrimination Law = EXP				Decay Constant 36Cl = 2.257 ± 0.015 E-06 1/a					Total Fusion Age				92.869	0.300727	651.488	5.76242		16	-11.2039	4.74739
	Irradiation = VU102							0.00323818		0.00884501							Irradiation = VU102				Atmospheric Ratio 40/36(a) = 298.56 ± 0.31										0.00323818		0.00884501
	J = 0.00460000 ± 0.00002300				Minimal External Error					13.9973							J = 0.00460000 ± 0.00002300				Atmospheric Ratio 38/36(a) = 0.1885 ± 0.0003					Minimal External Error							13.9973
	DRA = 25.520 ± 0.08 Ma				Analytical Error					1.77522							DRA = 25.520 ± 0.08 Ma				Production Ratio 39/37(ca) = 0.000673 ± 0.000004					Analytical Error							1.77522
																	IGSN = Undefined				Production Ratio 36/37(ca) = 0.000264 ± 0.000002
																	Preferred Age = Undefined				Production Ratio 40/39(k) = 0.000860 ± 0.000070					Normal Isochron No Convergence		1218	4219.27	102.228	8.43031	705.921	48.6617	> 100	100
																	Classification = Undefined				Production Ratio 38/39(k) = 0.012110 ± 0.000030								3.46409		0.0824655		0.0689336	0	16
																	Experiment Type = Undefined				Production Ratio 36/38(cl) = 262.80 ± 1.71					Minimal External Error							50.5866	1.75593	2σ Confidence Limit
																	Extraction Method = Undefined				Scaling Ratio K/Ca = 0.430					Analytical Error							48.3078	> 10	Error Magnification
																	Heating = 8 sec																100		Number of Iterations
																	Isolation = 8.00 min																0.0127415		Convergence
																	Instrument = HELIX
																	Lithology = Undefined									Inverse Isochron Error Chron		-628888	4.5906e+06	705.069	2508.82	2647.15	4981.16	> 100	100
																	Lat-Lon = Undefined - Undefined												7.29954		3.55826		1.88171	0	16
																	Feature = Undefined									Minimal External Error							4981.43	1.75593	2σ Confidence Limit
																										Analytical Error							4981.14	> 10	Error Magnification
																																	5		Number of Iterations
																																	0.000586073		Convergence
																																	24.716		Spreading Factor

## Sheet: YM4(Helix)
	VUA Helix MC
	Total fusion			36Ar(a) [fA]	37Ar(ca) [fA]	38Ar(cl) [fA]	39Ar(k) [fA]	40Ar(r) [fA]	Age	± 2s	40Ar(r)	39Ar(k)	K/Ca	± 2s			Relative Abundances			36Ar(a) [fA]	%1s	37Ar(ca) [fA]	%1s	38Ar(cl) [fA]	%1s	39Ar(k) [fA]	%1s	40Ar(r) [fA]	%1s	40(r)/39(k)	± 2s	Age	± 2s	40Ar(r)	39Ar(k)	K/Ca	± 2s
									(Ma)		(%)	(%)																				(Ma)		(%)	(%)
	119_VU102-Y2	8	4	0.0128772	-0.270418	0.000488331	11.2862	1233.13	745.775	5.97521	99.6884	3.49674	-17.9466	12.0686			119_VU102-Y2	8	4	0.0128061	3.66503	-0.270418	33.6202	0.139592	1.11195	11.286	0.487331	1236.98	0.0148924	109.26	1.06569	745.775	5.97521	99.6884	3.49674	-17.9466	12.0686
	120_VU102-Y2	8	4	0.0165585	-0.668825	0	21.5044	2366.97	750.308	6.0006	99.7908	6.66258	-13.8256	7.09945			120_VU102-Y2	8	4	0.0163819	3.74022	-0.668825	25.6705	0.262012	1.07784	21.5039	0.487043	2371.93	0.0160535	110.069	1.07287	750.308	6.0006	99.7908	6.66258	-13.8256	7.09945
	121_VU102-Y2	8	4	0.0141959	-0.373155	0	14.6863	1486.17	699.984	5.64941	99.7148	4.55017	-16.9236	23.0229			121_VU102-Y2	8	4	0.0140974	4.09936	-0.373155	68.0184	0.180333	1.1477	14.6861	0.485145	1490.42	0.0162558	101.194	0.982702	699.984	5.64941	99.7148	4.55017	-16.9236	23.0229
	122_VU102-Y2	8	4	0.01741	-0.114066	0	15.3306	1596.73	716.919	5.77905	99.6747	4.74979	-57.7924	161.3			122_VU102-Y2	8	4	0.0173799	3.7448	-0.114066	139.551	0.187784	1.02917	15.3305	0.486682	1601.94	0.0149879	104.153	1.01459	716.919	5.77905	99.6747	4.74979	-57.7924	161.3
	123_VU102-Y2	8	4	0.0289414	-0.0390449	0.00158345	4.35034	482.467	754.967	6.32165	98.2398	1.34784	-47.9102	559.257			123_VU102-Y2	8	4	0.028932	3.03736	-0.0390449	583.651	0.0597215	1.52892	4.35031	0.507645	491.111	0.0170975	110.903	1.13315	754.967	6.32165	98.2398	1.34784	-47.9102	559.257
	125_VU102-Y2	8	4	0.0310183	-0.2035	0.00196109	22.0452	2449.27	756.076	6.034	99.6225	6.83014	-46.582	102.469			125_VU102-Y2	8	4	0.0309657	2.82235	-0.2035	109.986	0.274776	0.995447	22.0451	0.486643	2458.55	0.0167607	111.102	1.08224	756.076	6.034	99.6225	6.83014	-46.582	102.469
	126_VU102-Y2	8	4	0.00703459	-0.0339585	0	7.76246	876.335	766.04	6.44916	99.7602	2.405	-98.2922	1123.74			126_VU102-Y2	8	4	0.00702562	6.11741	-0.0339585	571.633	0.0943718	1.31857	7.76244	0.514632	878.442	0.0159238	112.894	1.16301	766.04	6.44916	99.7602	2.405	-98.2922	1123.74
	127_VU102-Y2	8	4	0.00761358	-0.453935	0.00012536	10.5841	1264.7	802.262	6.49762	99.8199	3.2792	-10.026	10.7858			127_VU102-Y2	8	4	0.00749381	5.88023	-0.453935	53.7869	0.129734	1.12846	10.5838	0.499764	1266.99	0.0154886	119.491	1.19516	802.262	6.49762	99.8199	3.2792	-10.026	10.7858
	128_VU102-Y2	8	4	0.0125105	-0.404532	0.00203105	10.6079	1162.24	747.476	6.45801	99.6789	3.2866	-11.2758	13.1096			128_VU102-Y2	8	4	0.0124048	4.62879	-0.404532	58.1295	0.132852	1.2108	10.6077	0.512438	1165.98	0.117938	109.563	1.15286	747.476	6.45801	99.6789	3.2866	-11.2758	13.1096
	129_VU102-Y2	8	4	0.0111764	-0.0577272	0	12.4289	1396.93	763.263	6.15804	99.7609	3.85078	-92.5809	869.986			129_VU102-Y2	8	4	0.0111612	4.50299	-0.0577272	469.852	0.151391	1.24849	12.4289	0.492418	1400.28	0.0270078	112.394	1.10883	763.263	6.15804	99.7609	3.85078	-92.5809	869.986
	131_VU102-Y2	8	4	0.00967239	-0.458296	0	12.2912	1307.67	729.619	6.01774	99.7788	3.80811	-11.5323	9.78401			131_VU102-Y2	8	4	0.00955139	4.37627	-0.458296	42.4171	0.149217	1.16622	12.2909	0.498716	1310.57	0.0341599	106.391	1.06385	729.619	6.01774	99.7788	3.80811	-11.5323	9.78401
	132_VU102-Y2	8	4	0.0137769	-0.249082	0	13.8025	1516	749	6.03415	99.7286	4.27634	-23.8277	41.0349			132_VU102-Y2	8	4	0.0137112	3.96083	-0.249082	86.1062	0.168255	1.09686	13.8023	0.490298	1520.12	0.018939	109.835	1.0781	749	6.03415	99.7286	4.27634	-23.8277	41.0349
	133_VU102-Y2	8	4	0.00375582	-0.593766	0	8.57614	915.691	731.773	5.98799	99.8769	2.6571	-6.21077	5.73514			133_VU102-Y2	8	4	0.00359907	13.2639	-0.593766	46.1682	0.104068	1.32486	8.57574	0.495747	916.82	0.0180415	106.772	1.05983	731.773	5.98799	99.8769	2.6571	-6.21077	5.73514
	134_VU102-Y2	8	4	0.0253648	-0.521587	0	16.5522	1696.68	707.503	5.72427	99.5548	5.12828	-13.6458	10.7085			134_VU102-Y2	8	4	0.0252271	3.04069	-0.521587	39.2343	0.20119	1.07024	16.5519	0.487045	1704.27	0.0213303	102.505	0.999819	707.503	5.72427	99.5548	5.12828	-13.6458	10.7085
	135_VU102-Y2	8	4	0.0068306	-0.399608	0	9.91081	984.066	689.018	5.77661	99.7923	3.07061	-10.6646	12.3224			135_VU102-Y2	8	4	0.00672511	6.0136	-0.399608	57.7701	0.120713	1.18967	9.91054	0.502173	986.114	0.0256937	99.2922	0.998829	689.018	5.77661	99.7923	3.07061	-10.6646	12.3224
	70_VU102-Y2	8	4	0.00311509	-0.0753524	0	3.832	412.125	736.154	7.56001	99.774	1.18725	-21.8674	110.167			70_VU102-Y2	8	4	0.00309519	13.7455	-0.0753524	251.897	0.0461659	1.78167	3.83195	0.622585	413.058	0.0161699	107.548	1.34127	736.154	7.56001	99.774	1.18725	-21.8674	110.167
	71_VU102-Y2	8	4	0.0218057	-0.107867	0	8.24482	885.421	735.269	6.30832	99.2693	2.55444	-32.8671	130.455			71_VU102-Y2	8	4	0.0217772	2.96163	-0.107867	198.458	0.103542	1.18938	8.24474	0.520109	891.939	0.0166079	107.391	1.11866	735.269	6.30832	99.2693	2.55444	-32.8671	130.455
	72_VU102-Y2	8	4	0.0204962	-0.0438226	0	7.35955	823.138	760.22	6.38931	99.2613	2.28017	-72.2141	626.716			72_VU102-Y2	8	4	0.0204846	3.30775	-0.0438226	433.929	0.0912275	1.30659	7.35952	0.512625	829.263	0.0155495	111.846	1.14857	760.22	6.38931	99.2613	2.28017	-72.2141	626.716
	73_VU102-Y2	8	4	0.00940464	-0.433734	0	6.76038	766.714	768.915	6.67192	99.6344	2.09453	-6.70218	4.75008			73_VU102-Y2	8	4	0.00929013	4.66666	-0.433734	35.4328	0.0827128	1.10746	6.76009	0.530825	769.528	0.0146381	113.413	1.20508	768.915	6.67192	99.6344	2.09453	-6.70218	4.75008
	75_VU102-Y2	8	4	0.0142601	-0.252461	0	8.89323	964.076	740.98	6.35641	99.5595	2.75534	-15.1473	23.5021			75_VU102-Y2	8	4	0.0141934	3.54351	-0.252461	77.5771	0.109235	1.19956	8.89306	0.521066	968.341	0.0152325	108.406	1.13071	740.98	6.35641	99.5595	2.75534	-15.1473	23.5021
	76_VU102-Y2	8	4	0.0156866	-0.341521	0	7.6874	846.05	750.239	6.19062	99.4487	2.38174	-9.67899	14.7173			76_VU102-Y2	8	4	0.0155964	3.28411	-0.341521	76.0252	0.092932	1.26834	7.68717	0.501564	850.74	0.0306396	110.057	1.1068	750.239	6.19062	99.4487	2.38174	-9.67899	14.7173
	77_VU102-Y2	8	4	0.00830801	-0.142313	0	15.8343	1645.73	715.673	5.91058	99.8487	4.90584	-47.8435	133.717			77_VU102-Y2	8	4	0.00827044	6.18178	-0.142313	139.743	0.189498	1.07965	15.8342	0.497653	1648.23	0.0333631	103.935	1.03698	715.673	5.91058	99.8487	4.90584	-47.8435	133.717
	78_VU102-Y2	8	4	0.00302313	-0.00933618	0	2.74503	278.202	700.867	7.71766	99.6758	0.850477	-126.429	5813.47			78_VU102-Y2	8	4	0.00302067	12.2976	-0.00933618	2299.1	0.0334099	1.74403	2.74503	0.660242	279.107	0.0386598	101.348	1.34312	700.867	7.71766	99.6758	0.850477	-126.429	5813.47
	79_VU102-Y2	8	4	0.0130605	-0.0455377	0.000476681	10.4444	1180.92	767.002	6.2036	99.6701	3.23592	-98.6231	957.052			79_VU102-Y2	8	4	0.0130488	3.35608	-0.0455377	485.206	0.12942	1.25428	10.4443	0.494658	1184.83	0.0137756	113.068	1.11932	767.002	6.2036	99.6701	3.23592	-98.6231	957.052
	81_VU102-Y2	8	4	0.0160959	0.00100398	0	13.4095	1425.26	729.031	5.92292	99.6632	4.1546	5743.26	2.67197e+06			81_VU102-Y2	8	4	0.0160962	3.08015	0.00100398	23261.8	0.161192	1.01149	13.4095	0.491476	1430.08	0.0284339	106.287	1.04675	729.031	5.92292	99.6632	4.1546	5743.26	2.67197e+06
	82_VU102-Y2	8	4	0.00118103	-0.00703003	0	1.72028	182.364	727.455	9.53545	99.8062	0.532984	-105.223	5317.58			82_VU102-Y2	8	4	0.00117917	19.0115	-0.00703003	2526.82	0.0196455	1.87239	1.72027	0.791988	182.718	0.0443938	106.009	1.68373	727.455	9.53545	99.8062	0.532984	-105.223	5317.58
	83_VU102-Y2	8	4	0.0107306	-0.161355	0	13.8747	1514.98	745.387	6.17781	99.7882	4.29871	-36.975	80.7053			83_VU102-Y2	8	4	0.010688	4.79565	-0.161355	109.134	0.167403	1.08767	13.8745	0.499725	1518.2	0.0678911	109.19	1.10159	745.387	6.17781	99.7882	4.29871	-36.975	80.7053
	84_VU102-Y2	8	4	0.00212099	0.0538018	0.00123087	1.37588	154.087	761.028	9.64995	99.59	0.426281	10.9964	75.3314			84_VU102-Y2	8	4	0.00213586	16.4634	0.0538018	342.525	0.0182926	1.89301	1.37592	0.771151	154.721	0.0288054	111.991	1.73548	761.028	9.64995	99.59	0.426281	10.9964	75.3314
	85_VU102-Y2	8	4	0.0124729	-0.207233	0	15.2117	1658.04	744.305	6.03878	99.7751	4.71296	-31.5638	65.1255			85_VU102-Y2	8	4	0.0124181	3.65561	-0.207233	103.164	0.184212	1.08268	15.2116	0.493326	1661.78	0.0163515	108.998	1.07616	744.305	6.03878	99.7751	4.71296	-31.5638	65.1255
	91_VU102-Y2	8	4	0.0127056	-0.37595	0	13.6512	1558.33	773.01	6.2076	99.7564	4.22947	-15.6138	20.0493			91_VU102-Y2	8	4	0.0126064	4.50343	-0.37595	64.2017	0.167556	1.13292	13.651	0.491193	1562.14	0.0295219	114.153	1.12372	773.01	6.2076	99.7564	4.22947	-15.6138	20.0493
			S	0.383204	-6.99021	0.00789683	322.764	35030.5											S	0.381363	0.780569	-6.99021	16.6013	3.95245	0.226486	322.759	0.100101	35145.2	0.00641316
	Information on Analysis				Results		40(r)/39(k)	± 2s	Age	± 2s	MSWD	39Ar(k)	K/Ca	± 2s			Information on Analysis and Constants Used in Calculations									Results		40(a)/36(a)	± 2s	40(r)/39(k)	± 2s	Age	± 2s	MSWD	39Ar(k)	K/Ca	± 2s
									(Ma)			(%,n)																				(Ma)			(%,n)
	Sample = YM4(Y2)				Age Plateau Error Mean		108.359	1.62733	740.717	10.9923	63.0017	100	-9.92102	2.54909			Sample = YM4(Y2)				Age Equations = Conventional					Age Plateau Error Mean				108.359	1.62733	740.717	10.9923	63.0017	100	-9.92102	2.54909
	Material = muscovite							0.015018		0.0148401	0	30					Material = muscovite				Negative Intensities = Allowed										0.015018		0.0148401	0	30
	Location = China				Minimal External Error					18.1982	1.52523	2σ Confidence Limit					Location = China				Decay Constant 40K = 5.460 ± 0.053 E-10 1/a					Minimal External Error							18.1982	1.52523	2σ Confidence Limit
	Analyst = Xilin Sun				Analytical Error					9.14953	7.93736	Error Magnification					Analyst = Xilin Sun				Decay Constant 39Ar = 2.940 ± 0.016 E-07 1/h					Analytical Error							9.14953	7.93736	Error Magnification
	Project = VU102																Project = VU102				Decay Constant 37Ar = 8.230 ± 0.012 E-04 1/h
	Mass Discrimination Law = EXP				Total Fusion Age		108.533	0.217802	741.696	6.2205		30	-19.8547	6.59239			Mass Discrimination Law = EXP				Decay Constant 36Cl = 2.257 ± 0.015 E-06 1/a					Total Fusion Age				108.533	0.217802	741.696	6.2205		30	-19.8547	6.59239
	Irradiation = VU102							0.00200678		0.00838687							Irradiation = VU102				Atmospheric Ratio 40/36(a) = 298.56 ± 0.31										0.00200678		0.00838687
	J = 0.00460000 ± 0.00002300				Minimal External Error					15.7986							J = 0.00460000 ± 0.00002300				Atmospheric Ratio 38/36(a) = 0.1885 ± 0.0003					Minimal External Error							15.7986
	DRA = 25.520 ± 0.08 Ma				Analytical Error					1.22392							DRA = 25.520 ± 0.08 Ma				Production Ratio 39/37(ca) = 0.000673 ± 0.000004					Analytical Error							1.22392
																	IGSN = Undefined				Production Ratio 36/37(ca) = 0.000264 ± 0.000002
																	Preferred Age = Undefined				Production Ratio 40/39(k) = 0.000860 ± 0.000070					Normal Isochron No Convergence		1256.14	1248	106.787	2.2415	731.858	14.0274	44.3618	100
																	Classification = Undefined				Production Ratio 38/39(k) = 0.012110 ± 0.000030								0.993521		0.0209904		0.0191669	6.31887e-244	30
																	Experiment Type = Undefined				Production Ratio 36/38(cl) = 262.80 ± 1.71					Minimal External Error							20.0527	1.53452	2σ Confidence Limit
																	Extraction Method = Undefined				Scaling Ratio K/Ca = 0.430					Analytical Error							12.6637	6.66046	Error Magnification
																	Heating = 8 sec																100		Number of Iterations
																	Isolation = 8.00 min																0.00698038		Convergence
																	Instrument = HELIX
																	Lithology = Undefined									Inverse Isochron Error Chron		744.522	275.517	108.283	2.55635	740.29	15.6127	63.3808	100
																	Lat-Lon = Undefined - Undefined												0.370059		0.023608		0.02109	0	30
																	Feature = Undefined									Minimal External Error							21.304	1.53452	2σ Confidence Limit
																										Analytical Error							14.3762	7.96121	Error Magnification
																																	6		Number of Iterations
																																	2.56628e-05		Convergence
																																	0.1819		Spreading Factor

## Sheet: JS(Helix)
	VUA Helix MC
	Total fusion			36Ar(a) [fA]	37Ar(ca) [fA]	38Ar(cl) [fA]	39Ar(k) [fA]	40Ar(r) [fA]	Age	± 2s	40Ar(r)	39Ar(k)	K/Ca	± 2s			Relative Abundances			36Ar(a) [fA]	%1s	37Ar(ca) [fA]	%1s	38Ar(cl) [fA]	%1s	39Ar(k) [fA]	%1s	40Ar(r) [fA]	%1s	40(r)/39(k)	± 2s	Age	± 2s	40Ar(r)	39Ar(k)	K/Ca	± 2s
									(Ma)		(%)	(%)																				(Ma)		(%)	(%)
	10_VU102-Y8	8	4	0.00788745	-0.841405	0	10.3117	300.317	236.812	2.17554	99.2191	1.04411	-5.2698	4.85096			10_VU102-Y8	8	4	0.00766532	5.19932	-0.841405	46.0234	0.123975	1.00855	10.3112	0.487653	302.681	0.0178022	29.1239	0.285225	236.812	2.17554	99.2191	1.04411	-5.2698	4.85096
	11_VU102-Y8	8	4	0.028665	-0.741569	0.00100257	19.3908	573.571	240.284	2.20172	98.527	1.96342	-11.2438	13.8294			11_VU102-Y8	8	4	0.0284699	2.46875	-0.741569	61.4958	0.241229	1.02165	19.3903	0.487201	582.146	0.0155536	29.5795	0.289205	240.284	2.20172	98.527	1.96342	-11.2438	13.8294
	126_VU102-Y8	8	4	0.00187676	-0.141631	0	6.61264	196.356	241.155	2.28711	99.7126	0.669563	-20.0763	64.7443			126_VU102-Y8	8	4	0.00183937	21.741	-0.141631	161.245	0.0791775	1.25822	6.61254	0.501997	196.922	0.018907	29.694	0.300564	241.155	2.28711	99.7126	0.669563	-20.0763	64.7443
	127_VU102-Y8	8	4	0.0189331	-0.573367	0	14.0184	1234.98	639.042	5.34574	99.5434	1.41943	-10.5132	6.90318			127_VU102-Y8	8	4	0.0187818	3.51086	-0.573367	32.8274	0.16891	1.18246	14.018	0.494982	1240.65	0.0152812	88.0975	0.872986	639.042	5.34574	99.5434	1.41943	-10.5132	6.90318
	128_VU102-Y8	8	4	0.0100949	-0.371829	0	10.8491	1242.85	794.303	6.39927	99.7573	1.09853	-12.5464	14.5234			128_VU102-Y8	8	4	0.00999674	5.04931	-0.371829	57.8766	0.131998	1.19578	10.8489	0.496104	1245.87	0.0148555	114.558	1.13749	794.303	6.39927	99.7573	1.09853	-12.5464	14.5234
	129_VU102-Y8	8	4	0.0262058	-0.50759	0	21.4077	1975.15	664.377	5.42563	99.6045	2.16764	-18.1353	16.2243			129_VU102-Y8	8	4	0.0260718	3.40696	-0.50759	44.7286	0.259687	1.1255	21.4074	0.486456	1982.99	0.014498	92.2635	0.898374	664.377	5.42563	99.6045	2.16764	-18.1353	16.2243
	13_VU102-Y8	8	4	0.00546509	-0.248754	0	7.31504	826.258	785.253	6.40087	99.8022	0.740684	-12.6449	34.4475			13_VU102-Y8	8	4	0.00539942	5.96099	-0.248754	136.21	0.0881956	1.14291	7.31487	0.500797	827.896	0.0149306	112.953	1.13216	785.253	6.40087	99.8022	0.740684	-12.6449	34.4475
	131_VU102-Y8	8	4	0.0063462	-0.259838	0	8.97611	258.797	234.582	2.19573	99.2703	0.908876	-14.8544	23.5725			131_VU102-Y8	8	4	0.0062776	7.49372	-0.259838	79.3437	0.107182	1.17556	8.97594	0.49521	260.699	0.0201687	28.8317	0.287522	234.582	2.19573	99.2703	0.908876	-14.8544	23.5725
	132_VU102-Y8	8	4	0.0280775	-0.185789	0	16.7764	1339.22	587.69	4.91443	99.3769	1.69869	-38.8282	79.871			132_VU102-Y8	8	4	0.0280285	2.84172	-0.185789	102.851	0.20654	1.07875	16.7762	0.48823	1347.62	0.0147713	79.8279	0.780361	587.69	4.91443	99.3769	1.69869	-38.8282	79.871
	133_VU102-Y8	8	4	0.00417652	-0.22732	0	12.4836	337.542	220.839	2.11584	99.6288	1.26402	-23.6139	36.9361			133_VU102-Y8	8	4	0.00411651	13.0306	-0.22732	78.2065	0.151043	1.05135	12.4834	0.506032	338.8	0.0156373	27.0389	0.274989	220.839	2.11584	99.6288	1.26402	-23.6139	36.9361
	134_VU102-Y8	8	4	0.00985138	-0.108589	0	13.3054	1326.55	708.751	5.82123	99.7779	1.34723	-52.688	167.421			134_VU102-Y8	8	4	0.00982271	5.02697	-0.108589	158.879	0.160206	1.0727	13.3053	0.494871	1329.51	0.015558	99.7007	0.987516	708.751	5.82123	99.7779	1.34723	-52.688	167.421
	135_VU102-Y8	8	4	0.0444127	-0.380572	0	22.9787	2533.82	770.008	6.10568	99.4786	2.3267	-25.9631	23.7711			135_VU102-Y8	8	4	0.0443123	2.46471	-0.380572	45.7759	0.282722	1.02609	22.9784	0.485151	2547.09	0.0174305	110.268	1.071	770.008	6.10568	99.4786	2.3267	-25.9631	23.7711
	137_VU102-Y8	8	4	0.0133031	-0.194804	0	16.6796	449.557	220.174	2.02516	99.1211	1.68889	-36.8176	79.4266			137_VU102-Y8	8	4	0.0132517	4.92949	-0.194804	107.864	0.199634	1.06627	16.6795	0.485854	453.543	0.0168668	26.9525	0.263108	220.174	2.02516	99.1211	1.68889	-36.8176	79.4266
	138_VU102-Y8	8	4	0.0221105	-0.291704	0	27.0267	2582.25	684.084	5.54184	99.7441	2.73659	-39.8401	64.6212			138_VU102-Y8	8	4	0.0220335	3.15699	-0.291704	81.0993	0.32747	1.11471	27.0265	0.484791	2588.87	0.0229357	95.5442	0.927543	684.084	5.54184	99.7441	2.73659	-39.8401	64.6212
	139_VU102-Y8	8	4	0.00828305	0.177139	0.000190631	6.48734	599.846	665.588	5.68653	99.5885	0.656876	15.7479	36.4333			139_VU102-Y8	8	4	0.00832992	6.90804	0.177139	115.676	0.0803137	1.25969	6.48746	0.508356	602.325	0.0176884	92.4641	0.942196	665.588	5.68653	99.5885	0.656876	15.7479	36.4333
	14_VU102-Y8	8	4	0.00525352	0.127877	0	7.86165	899.44	793.462	6.43741	99.8252	0.796031	26.4357	147.445			14_VU102-Y8	8	4	0.00528728	6.90341	0.127877	278.875	0.0949061	1.10317	7.86174	0.499436	901.015	0.015513	114.408	1.14374	793.462	6.43741	99.8252	0.796031	26.4357	147.445
	140_VU102-Y8	8	4	0.0158691	0.140987	0	24.6407	834.57	272.656	2.47714	99.433	2.49499	75.1523	208.212			140_VU102-Y8	8	4	0.0159063	4.40041	0.140987	138.526	0.298998	1.05304	24.6408	0.487629	839.329	0.0247629	33.8695	0.331185	272.656	2.47714	99.433	2.49499	75.1523	208.212
	141_VU102-Y8	8	4	0.00877304	-0.406793	0	10.0333	971.209	691.562	5.72317	99.7301	1.01592	-10.6057	14.0532			141_VU102-Y8	8	4	0.00866565	4.67144	-0.406793	66.2513	0.122868	1.08812	10.033	0.496383	973.837	0.0165853	96.7984	0.961812	691.562	5.72317	99.7301	1.01592	-10.6057	14.0532
	147_VU102-Y8	8	4	0.0140566	-0.00718185	0	18.6892	542.901	236.24	2.16446	99.23	1.89237	-1118.98	57082			147_VU102-Y8	8	4	0.0140547	3.62034	-0.00718185	2550.63	0.222512	0.995347	18.6892	0.487191	547.113	0.0164983	29.049	0.283683	236.24	2.16446	99.23	1.89237	-1118.98	57082
	148_VU102-Y8	8	4	0.0107766	-0.119919	0	5.51471	652.045	814.886	6.90657	99.5083	0.558392	-19.7744	68.9879			148_VU102-Y8	8	4	0.0107449	4.9255	-0.119919	174.437	0.0679653	1.43601	5.51463	0.524238	655.267	0.014954	118.237	1.24153	814.886	6.90657	99.5083	0.558392	-19.7744	68.9879
	149_VU102-Y8	8	4	0.015544	-0.222537	0	11.4695	338.068	239.491	2.26211	98.643	1.16134	-22.1621	44.7533			149_VU102-Y8	8	4	0.0154853	3.89717	-0.222537	100.967	0.139594	1.24975	11.4694	0.500527	342.719	0.0208385	29.4754	0.297009	239.491	2.26211	98.643	1.16134	-22.1621	44.7533
	15_VU102-Y8	8	4	0.0439325	-0.284155	0	33.8374	948.939	228.557	2.09212	98.6336	3.4262	-51.2047	132.156			15_VU102-Y8	8	4	0.0438574	2.43891	-0.284155	129.046	0.412709	1.01794	33.8372	0.485442	962.085	0.0142859	28.0441	0.273055	228.557	2.09212	98.6336	3.4262	-51.2047	132.156
	150_VU102-Y8	8	4	0.00486696	0.233116	0	7.50288	221.665	240.013	2.31576	99.3459	0.759703	13.8396	22.58			150_VU102-Y8	8	4	0.00492851	6.04269	0.233116	81.5759	0.0903392	1.30529	7.50303	0.512559	223.124	0.023409	29.544	0.30414	240.013	2.31576	99.3459	0.759703	13.8396	22.58
	151_VU102-Y8	8	4	0.0063285	-0.271988	0	8.84016	741.226	612.831	5.27216	99.7447	0.89511	-13.9759	22.9037			151_VU102-Y8	8	4	0.00625669	8.01619	-0.271988	81.9386	0.106786	1.1315	8.83998	0.505487	743.123	0.015213	83.8475	0.848736	612.831	5.27216	99.7447	0.89511	-13.9759	22.9037
	153_VU102-Y8	8	4	0.00544354	-0.20953	0	17.0201	472.394	226.341	2.0748	99.6541	1.72337	-34.9289	77.5401			153_VU102-Y8	8	4	0.00538823	8.18759	-0.20953	110.996	0.20536	1.03911	17.02	0.48609	474.033	0.0180547	27.755	0.270466	226.341	2.0748	99.6541	1.72337	-34.9289	77.5401
	154_VU102-Y8	8	4	0.00152611	-0.0893733	0	3.53315	166.651	369.515	3.74901	99.7255	0.357749	-16.999	66.2496			154_VU102-Y8	8	4	0.00150251	20.5915	-0.0893733	194.863	0.043072	1.51352	3.53309	0.556462	167.109	0.031736	47.1677	0.52845	369.515	3.74901	99.7255	0.357749	-16.999	66.2496
	155_VU102-Y8	8	4	0.00175013	-0.335057	0	3.4018	341.629	713.021	6.66898	99.8464	0.344449	-4.36575	5.64418			155_VU102-Y8	8	4	0.00166167	26.5922	-0.335057	64.6391	0.0405828	1.74946	3.40158	0.5618	342.154	0.0404214	100.426	1.13397	713.021	6.66898	99.8464	0.344449	-4.36575	5.64418
	156_VU102-Y8	8	4	0.00173916	-0.0849181	0	14.7183	89.7507	52.181	0.525371	99.4108	1.4903	-74.529	415.522			156_VU102-Y8	8	4	0.00171674	24.1304	-0.0849181	278.765	0.177611	1.05592	14.7182	0.490313	90.2826	0.0298278	6.0979	0.062274	52.181	0.525371	99.4108	1.4903	-74.529	415.522
	157_VU102-Y8	8	4	0.0127939	-0.226414	0.000948101	11.1917	646.478	443.186	3.86461	99.4111	1.13322	-21.2551	41.0944			157_VU102-Y8	8	4	0.0127346	4.89202	-0.226414	96.6684	0.138891	1.23839	11.1916	0.489745	650.307	0.0167244	57.764	0.567104	443.186	3.86461	99.4111	1.13322	-21.2551	41.0944
	159_VU102-Y8	8	4	0.0169037	-0.526847	0	10.8227	1200.58	773.787	6.33416	99.5806	1.09586	-8.83327	8.54636			159_VU102-Y8	8	4	0.0167646	3.46735	-0.526847	48.3734	0.13282	1.06613	10.8224	0.500857	1205.64	0.0277257	110.932	1.11337	773.787	6.33416	99.5806	1.09586	-8.83327	8.54636
	16_VU102-Y8	8	4	0.0109899	0.105608	0.000682727	13.6971	1444	742.183	5.99866	99.7725	1.3869	55.7699	336.11			16_VU102-Y8	8	4	0.0110182	4.59014	0.105608	301.336	0.168626	1.16757	13.6972	0.491178	1447.3	0.014729	105.424	1.03636	742.183	5.99866	99.7725	1.3869	55.7699	336.11
	17_VU102-Y8	8	4	0.00601472	0.222461	0	29.0748	97.9331	29.007	0.289719	98.1747	2.94397	56.1994	209.491			17_VU102-Y8	8	4	0.00607345	7.00601	0.222461	186.381	0.342006	1.02232	29.075	0.484505	99.7538	0.0254894	3.36831	0.0339095	29.007	0.289719	98.1747	2.94397	56.1994	209.491
	19_VU102-Y8	8	4	0.00661426	-0.0133904	0	2.62929	75.1815	232.765	2.96628	97.4377	0.266228	-84.4333	4920.55			19_VU102-Y8	8	4	0.00661072	6.22825	-0.0133904	2913.87	0.0326728	1.42537	2.62928	0.656687	77.1585	0.0249651	28.5939	0.388037	232.765	2.96628	97.4377	0.266228	-84.4333	4920.55
	20_VU102-Y8	8	4	0.0120139	0.460925	0	17.9154	526.369	238.771	2.19132	99.3203	1.81402	16.7134	25.9543			20_VU102-Y8	8	4	0.0121356	5.66843	0.460925	77.6438	0.216893	1.00981	17.9157	0.487511	529.972	0.0177325	29.3808	0.287601	238.771	2.19132	99.3203	1.81402	16.7134	25.9543
	21_VU102-Y8	8	4	0.0155655	-0.554704	0	11.0821	1256.24	787.537	6.32874	99.6307	1.12212	-8.59071	9.08507			21_VU102-Y8	8	4	0.015419	3.89015	-0.554704	52.875	0.134187	1.1324	11.0817	0.493949	1260.9	0.0147024	113.358	1.1208	787.537	6.32874	99.6307	1.12212	-8.59071	9.08507
	22_VU102-Y8	8	4	0.0257474	-1.23117	0	15.4725	1432.92	666.475	5.54749	99.4655	1.56667	-5.40393	3.55663			22_VU102-Y8	8	4	0.0254224	2.69468	-1.23117	32.9041	0.189239	1.06702	15.4717	0.496121	1440.62	0.0132476	92.6111	0.919605	666.475	5.54749	99.4655	1.56667	-5.40393	3.55663
	23_VU102-Y8	8	4	0.018721	-0.556631	0	23.493	691.042	239.03	2.18057	99.1948	2.37878	-18.1484	22.3203			23_VU102-Y8	8	4	0.018574	2.9861	-0.556631	61.492	0.281229	1.06113	23.4926	0.485666	696.652	0.0162107	29.4149	0.286231	239.03	2.18057	99.1948	2.37878	-18.1484	22.3203
	25_VU102-Y8	8	4	0.0136628	-1.30006	0	13.261	389.256	238.561	2.18423	98.9601	1.34275	-4.38615	3.02954			25_VU102-Y8	8	4	0.0133196	3.83719	-1.30006	34.5319	0.15949	1.30775	13.2602	0.486232	393.346	0.0191702	29.3534	0.286638	238.561	2.18423	98.9601	1.34275	-4.38615	3.02954
	26_VU102-Y8	8	4	0.025639	-0.574478	0	12.8694	1214.05	676.848	5.56188	99.3725	1.3031	-9.63286	20.2893			26_VU102-Y8	8	4	0.0254873	2.4181	-0.574478	105.312	0.156214	1.09456	12.8691	0.490996	1221.71	0.0142964	94.3355	0.927226	676.848	5.56188	99.3725	1.3031	-9.63286	20.2893
	27_VU102-Y8	8	4	0.00455935	-0.829453	0	11.5346	341.955	240.79	2.25863	99.6006	1.16793	-5.97969	8.09712			27_VU102-Y8	8	4	0.00434038	11.5974	-0.829453	67.7033	0.137137	1.12681	11.534	0.498121	343.326	0.017283	29.646	0.296763	240.79	2.25863	99.6006	1.16793	-5.97969	8.09712
	28_VU102-Y8	8	4	0.00489457	0.38698	0	10.6569	310.583	236.964	2.20162	99.5288	1.07906	11.8416	41.7137			28_VU102-Y8	8	4	0.00499673	8.44764	0.38698	176.131	0.126516	1.16149	10.6572	0.492921	312.054	0.0178693	29.1438	0.288668	236.964	2.20162	99.5288	1.07906	11.8416	41.7137
	29_VU102-Y8	8	4	0.0250548	0.33243	0	11.7726	789.94	505.725	4.35555	99.0607	1.19204	15.228	58.7779			29_VU102-Y8	8	4	0.0251425	2.79005	0.33243	192.992	0.143609	1.12163	11.7729	0.491762	797.431	0.0160958	67.0997	0.661348	505.725	4.35555	99.0607	1.19204	15.228	58.7779
	7_VU102-Y8	8	4	0.0667873	-1.6136	0	28.0692	2550.88	655.994	5.34097	99.2234	2.84214	-7.48003	3.52771			7_VU102-Y8	8	4	0.0663613	2.27959	-1.6136	23.5759	0.347639	1.00292	28.0681	0.483813	2570.85	0.01437	90.8786	0.880317	655.994	5.34097	99.2234	2.84214	-7.48003	3.52771
	8_VU102-Y8	8	4	0.0161582	-0.987836	0	20.4011	593.381	236.521	2.16038	99.1906	2.06571	-8.88049	7.44979			8_VU102-Y8	8	4	0.0158974	3.13836	-0.987836	41.9419	0.247398	1.04276	20.4004	0.485801	598.223	0.0185055	29.0857	0.283193	236.521	2.16038	99.1906	2.06571	-8.88049	7.44979
	82_VU102-Y8	8	4	0.0497949	-0.219622	0	28.3685	836.345	239.537	2.17912	98.2506	2.87245	-55.5428	113.121			82_VU102-Y8	8	4	0.0497369	2.29248	-0.219622	101.831	0.351923	1.01175	28.3683	0.48326	851.236	0.0161267	29.4815	0.28612	239.537	2.17912	98.2506	2.87245	-55.5428	113.121
	83_VU102-Y8	8	4	0.0294754	0.106151	0	27.1649	3052.83	782.015	6.14113	99.7118	2.75059	110.04	486.073			83_VU102-Y8	8	4	0.0295034	3.25715	0.106151	220.861	0.333368	1.04985	27.165	0.482126	3061.65	0.0138994	112.381	1.0843	782.015	6.14113	99.7118	2.75059	110.04	486.073
	84_VU102-Y8	8	4	0.0241484	0.0435031	0	18.5695	1873.49	715.754	5.72689	99.6158	1.88025	183.547	1666.83			84_VU102-Y8	8	4	0.0241598	2.85964	0.0435031	454.061	0.228203	1.05316	18.5695	0.482982	1880.72	0.0139196	100.891	0.975234	715.754	5.72689	99.6158	1.88025	183.547	1666.83
	85_VU102-Y8	8	4	0.0284933	-0.60043	0	21.3673	2567.44	825.534	6.41822	99.669	2.16355	-15.3023	12.4966			85_VU102-Y8	8	4	0.0283348	3.01297	-0.60043	40.8296	0.262403	1.05547	21.3669	0.482572	2575.96	0.0149283	120.157	1.16047	825.534	6.41822	99.669	2.16355	-15.3023	12.4966
	9_VU102-Y8	8	4	0.0101397	-1.03635	0	12.2631	362.618	240.211	2.23974	99.1692	1.2417	-5.08818	3.87732			9_VU102-Y8	8	4	0.00986614	4.80078	-1.03635	38.098	0.146608	1.11619	12.2624	0.495495	365.656	0.018927	29.5699	0.294188	240.211	2.23974	99.1692	1.2417	-5.08818	3.87732
	91_VU102-Y8	8	4	0.0244189	-0.620831	0	28.2758	2641.28	671.297	5.44104	99.7238	2.86306	-19.5844	15.3023			91_VU102-Y8	8	4	0.024255	4.13125	-0.620831	39.0645	0.343492	1.02224	28.2754	0.483707	2648.6	0.0147543	93.4115	0.904335	671.297	5.44104	99.7238	2.86306	-19.5844	15.3023
	92_VU102-Y8	8	4	0.00625429	-0.465928	0.000286684	7.47001	651.076	633.284	5.56573	99.713	0.756376	-6.894	7.19692			92_VU102-Y8	8	4	0.00613145	7.42508	-0.465928	52.1944	0.0919275	1.14676	7.4697	0.519095	652.95	0.016684	87.1586	0.906058	633.284	5.56573	99.713	0.756376	-6.894	7.19692
	93_VU102-Y8	8	4	0.00714433	-0.312343	0	13.6137	417.979	248.815	2.29833	99.4895	1.37846	-18.7419	35.4167			93_VU102-Y8	8	4	0.00706187	6.28152	-0.312343	94.4839	0.1613	1.15409	13.6135	0.492569	420.124	0.0178149	30.7027	0.303305	248.815	2.29833	99.4895	1.37846	-18.7419	35.4167
	94_VU102-Y8	8	4	0.00651365	-0.102145	5.8436e-05	10.435	1150.68	770.023	6.26058	99.8305	1.0566	-43.9286	228.518			94_VU102-Y8	8	4	0.00648672	7.33626	-0.102145	260.101	0.127654	1.07877	10.435	0.497415	1152.63	0.0192897	110.271	1.09818	770.023	6.26058	99.8305	1.0566	-43.9286	228.518
	95_VU102-Y8	8	4	0.0235831	-0.43782	0	24.1818	2308.44	683.593	5.53496	99.695	2.44853	-23.7499	27.714			95_VU102-Y8	8	4	0.0234675	3.08708	-0.43782	58.3435	0.294202	1.02757	24.1815	0.48479	2315.51	0.0141961	95.462	0.926143	683.593	5.53496	99.695	2.44853	-23.7499	27.714
	153_VU102-Y8	8	4	0.0176011	-1.83851	0	17.0671	2299.45	904.409	7.04464	99.7714	1.72813	-3.99174	3.23635			153_VU102-Y8	8	4	0.0171157	3.46914	-1.83851	40.5351	0.207914	1.04464	17.0659	0.49327	2304.72	0.0137471	134.73	1.32979	904.409	7.04464	99.7714	1.72813	-3.99174	3.23635
	154_VU102-Y8	8	4	0.0153458	-0.482479	0	22.1385	634.765	233.366	2.14824	99.2804	2.24163	-19.7304	65.1929			154_VU102-Y8	8	4	0.0152184	3.54447	-0.482479	165.208	0.268676	1.00885	22.1381	0.489232	639.366	0.0149019	28.6725	0.281116	233.366	2.14824	99.2804	2.24163	-19.7304	65.1929
	155_VU102-Y8	8	4	0.0393045	-0.19225	0	18.0939	2037.91	783.422	6.23256	99.4267	1.8321	-40.4701	386.783			155_VU102-Y8	8	4	0.0392538	2.22726	-0.19225	477.862	0.223883	0.976151	18.0938	0.488509	2049.66	0.0139457	112.63	1.10129	783.422	6.23256	99.4267	1.8321	-40.4701	386.783
	156_VU102-Y8	8	4	0.0105351	-0.424611	0	24.1107	731.461	246.046	2.23215	99.569	2.44133	-24.4167	108.437			156_VU102-Y8	8	4	0.010423	5.26943	-0.424611	222.055	0.29395	1.03024	24.1104	0.483896	734.627	0.0149347	30.3376	0.294126	246.046	2.23215	99.569	2.44133	-24.4167	108.437
	157_VU102-Y8	8	4	0.00833928	1.61461	0	16.3742	473.052	235.028	2.16953	99.4735	1.65796	4.36072	4.2578			157_VU102-Y8	8	4	0.00876554	4.39002	1.61461	48.8174	0.195868	1.06063	16.3752	0.49073	475.556	0.0154325	28.8902	0.284161	235.028	2.16953	99.4735	1.65796	4.36072	4.2578
	159_VU102-Y8	8	4	0.00764445	1.15966	0	9.89379	256.389	212.165	2.04398	99.1144	1.0018	3.66861	5.98167			159_VU102-Y8	8	4	0.0079506	5.2191	1.15966	81.5236	0.119572	1.08085	9.89457	0.506653	258.68	0.0165465	25.9142	0.264395	212.165	2.04398	99.1144	1.0018	3.66861	5.98167
	160_VU102-Y8	8	4	0.00495049	-1.34309	0	10.3662	1185.49	793.196	6.61742	99.8747	1.04963	-3.31881	5.46127			160_VU102-Y8	8	4	0.00459591	9.75327	-1.34309	82.2758	0.124142	1.2707	10.3653	0.51356	1186.98	0.0150647	114.361	1.17555	793.196	6.61742	99.8747	1.04963	-3.31881	5.46127
	161_VU102-Y8	8	4	0.0306092	0.605856	0	24.0544	2670.55	774.296	6.16346	99.6582	2.43563	17.0724	51.9367			161_VU102-Y8	8	4	0.0307691	2.50082	0.605856	152.106	0.292861	1.04655	24.0549	0.487675	2679.71	0.0162299	111.021	1.08367	774.296	6.16346	99.6582	2.43563	17.0724	51.9367
	162_VU102-Y8	8	4	0.0220853	0.402817	0	13.0056	1469.06	785.269	6.34384	99.5524	1.31688	13.8832	68.8503			162_VU102-Y8	8	4	0.0221917	2.82001	0.402817	247.962	0.158513	1.277	13.0058	0.496273	1475.66	0.0135937	112.956	1.12208	785.269	6.34384	99.5524	1.31688	13.8832	68.8503
	163_VU102-Y8	8	4	0.0234098	-0.802599	0	15.1665	1441.97	681.284	5.71824	99.5167	1.53568	-8.1256	21.0542			163_VU102-Y8	8	4	0.0231979	2.8777	-0.802599	129.554	0.186135	1.20334	15.166	0.50206	1448.97	0.0161394	95.0759	0.955604	681.284	5.71824	99.5167	1.53568	-8.1256	21.0542
			S	1.04346	-18.2797	0.00316915	987.606	65620.6											S	1.03864	0.496254	-18.2797	20.5728	11.9987	0.147158	987.594	0.0673223	65933	0.00251846
	Information on Analysis				Results		40(r)/39(k)	± 2s	Age	± 2s	MSWD	39Ar(k)	K/Ca	± 2s			Information on Analysis and Constants Used in Calculations									Results		40(a)/36(a)	± 2s	40(r)/39(k)	± 2s	Age	± 2s	MSWD	39Ar(k)	K/Ca	± 2s
									(Ma)			(%,n)																				(Ma)			(%,n)
	Sample = JS(Y8)				Age Plateau Error Mean		11.6858	4.35573	98.7266	35.8377	28070.4	100	-4.9722	1.24027			Sample = JS(Y8)				Age Equations = Conventional					Age Plateau Error Mean				11.6858	4.35573	98.7266	35.8377	28070.4	100	-4.9722	1.24027
	Material = muscovite							0.372737		0.363	0	64					Material = muscovite				Negative Intensities = Allowed										0.372737		0.363	0	64
	Location = China				Minimal External Error					35.8898	1.35635	2σ Confidence Limit					Location = China				Decay Constant 40K = 5.460 ± 0.053 E-10 1/a					Minimal External Error							35.8898	1.35635	2σ Confidence Limit
	Analyst = Xilin Sun				Analytical Error					35.8248	167.542	Error Magnification					Analyst = Xilin Sun				Decay Constant 39Ar = 2.940 ± 0.016 E-07 1/h					Analytical Error							35.8248	167.542	Error Magnification
	Project = VU102																Project = VU102				Decay Constant 37Ar = 8.230 ± 0.012 E-04 1/h
	Mass Discrimination Law = EXP				Total Fusion Age		66.4441	0.0895824	501.403	4.42595		64	-23.2319	9.55894			Mass Discrimination Law = EXP				Decay Constant 36Cl = 2.257 ± 0.015 E-06 1/a					Total Fusion Age				66.4441	0.0895824	501.403	4.42595		64	-23.2319	9.55894
	Irradiation = VU102							0.00134824		0.00882713							Irradiation = VU102				Atmospheric Ratio 40/36(a) = 298.56 ± 0.31										0.00134824		0.00882713
	J = 0.00473943 ± 0.00002370				Minimal External Error					10.769							J = 0.00473943 ± 0.00002370				Atmospheric Ratio 38/36(a) = 0.1885 ± 0.0003					Minimal External Error							10.769
	DRA = 25.520 ± 0.08 Ma				Analytical Error					0.591372							DRA = 25.520 ± 0.08 Ma				Production Ratio 39/37(ca) = 0.000673 ± 0.000004					Analytical Error							0.591372
																	IGSN = Undefined				Production Ratio 36/37(ca) = 0.000264 ± 0.000002
																	Preferred Age = Undefined				Production Ratio 40/39(k) = 0.000860 ± 0.000070					Normal Isochron Error Chron		209068	52604.3	-245.775	74.4239	0	3921.32	83.6373	100
																	Classification = Undefined				Production Ratio 38/39(k) = 0.012110 ± 0.000030								0.251613		0.302813			0	64
																	Experiment Type = Undefined				Production Ratio 36/38(cl) = 262.80 ± 1.71					Minimal External Error							3921.32	1.35921	2σ Confidence Limit
																	Extraction Method = Undefined				Scaling Ratio K/Ca = 0.430					Analytical Error							3919.18	9.14534	Error Magnification
																	Heating = 8 sec																16		Number of Iterations
																	Isolation = 8.00 min																0.00140159		Convergence
																	Instrument = HELIX
																	Lithology = Undefined									Inverse Isochron Error Chron		142444	50707.1	-64.8866	27.7437	-673.048	347.867	> 100	100
																	Lat-Lon = Undefined - Undefined												0.355978		0.427572		0.516853	0	64
																	Feature = Undefined									Minimal External Error							348.116	1.35921	2σ Confidence Limit
																										Analytical Error							347.772	> 10	Error Magnification
																																	4		Number of Iterations
																																	0.011338		Convergence
																																	18.4365		Spreading Factor

## Sheet: P1(Helix)
VUA Helix MC
Total fusion			36Ar(a) [fA]	37Ar(ca) [fA]	38Ar(cl) [fA]	39Ar(k) [fA]	40Ar(r) [fA]	Age	± 2s	40Ar(r)	39Ar(k)	K/Ca	± 2s			Relative Abundances			36Ar(a) [fA]	%1s	37Ar(ca) [fA]	%1s	38Ar(cl) [fA]	%1s	39Ar(k) [fA]	%1s	40Ar(r) [fA]	%1s	40(r)/39(k)	± 2s	Age	± 2s	40Ar(r)	39Ar(k)	K/Ca	± 2s
								(Ma)		(%)	(%)																				(Ma)		(%)	(%)
160_VU102-Y9	8	4	0.0285172	-0.0111728	0.000218483	9.34925	13.2289	11.8823	0.57305	60.8195	3.32523	-359.818	169970		160_VU102-Y9	8	4	0.0285144	2.74398	-0.0111728	23618.9	0.118813	3.28829	9.34924	0.499402	21.751	0.05377	1.41497	0.0684613	11.8823	0.57305	60.8195	3.32523	-359.818	169970
161_VU102-Y9	8	4	0.00175126	-0.331881	0	2.77926	79.5098	226.43	3.00319	99.3437	0.988493	-3.60093	57.4533		161_VU102-Y9	8	4	0.00166364	20.5507	-0.331881	797.755	0.0337047	10.9451	2.77903	0.637719	80.0351	0.0302051	28.6083	0.403376	226.43	3.00319	99.3437	0.988493	-3.60093	57.4533
162_VU102-Y9	8	4	0.00320888	-0.124958	0	6.92769	203.099	231.699	2.32873	99.5276	2.46396	-23.8392	1006.66		162_VU102-Y9	8	4	0.00317589	11.2539	-0.124958	2111.36	0.0829754	4.53525	6.92761	0.521701	204.063	0.0121095	29.317	0.313687	231.699	2.32873	99.5276	2.46396	-23.8392	1006.66
163_VU102-Y9	8	4	0.00926962	0.0149902	0	6.09281	180.074	233.467	2.34044	98.4836	2.16702	174.775	61672.2		163_VU102-Y9	8	4	0.00927358	5.75957	0.0149902	17643.3	0.074005	5.09435	6.09282	0.512469	182.847	0.0165839	29.5552	0.315567	233.467	2.34044	98.4836	2.16702	174.775	61672.2
165_VU102-Y9	8	4	0.00284411	0.308241	0	7.6224	213.455	221.923	2.1694	99.6007	2.71105	10.6333	182.348		165_VU102-Y9	8	4	0.00292549	12.7269	0.308241	857.433	0.0905598	4.2169	7.62261	0.506171	214.311	0.0183553	28.0037	0.290669	221.923	2.1694	99.6007	2.71105	10.6333	182.348
166_VU102-Y9	8	4	0.00247371	0.472826	0.000108223	10.9081	15.4535	11.8969	0.386429	95.3835	3.87965	9.92006	111.067		166_VU102-Y9	8	4	0.00259859	15.0883	0.472826	559.812	0.132671	2.95083	10.9084	0.496987	16.2014	0.0999754	1.4167	0.0461663	11.8969	0.386429	95.3835	3.87965	9.92006	111.067
167_VU102-Y9	8	4	0.00193617	0.259036	0	4.04059	5.14144	10.689	0.952505	89.8386	1.43711	6.70737	136.856		167_VU102-Y9	8	4	0.00200455	15.268	0.259036	1020.19	0.0488982	7.56818	4.04076	0.568732	5.72298	0.23913	1.27245	0.11372	10.689	0.952505	89.8386	1.43711	6.70737	136.856
168_VU102-Y9	8	4	0.00235224	0.0563989	0	2.98099	85.0189	225.776	2.87509	99.1778	1.06024	22.7278	2132.87		168_VU102-Y9	8	4	0.00236713	15.0053	0.0563989	4692.21	0.0362152	10.1263	2.98102	0.614564	85.7238	0.0312592	28.5204	0.386033	225.776	2.87509	99.1778	1.06024	22.7278	2132.87
169_VU102-Y9	8	4	0.000564331	0.588322	0	2.79642	80.9096	228.848	2.97148	99.7892	0.994599	2.04389	18.4101		169_VU102-Y9	8	4	0.000719647	54.6831	0.588322	450.369	0.0338819	10.8326	2.79682	0.619944	81.0804	0.0274381	28.9332	0.399644	228.848	2.97148	99.7892	0.994599	2.04389	18.4101
175_VU102-Y9	8	4	0.00191502	-0.346428	0.000705612	6.04498	14.4945	20.0904	0.663389	96.1719	2.15001	-7.50326	114.946		175_VU102-Y9	8	4	0.00182394	16.3531	-0.346428	765.971	0.0742713	5.01595	6.04475	0.534487	15.0714	0.0944967	2.39777	0.0796099	20.0904	0.663389	96.1719	2.15001	-7.50326	114.946
176_VU102-Y9	8	4	0.00346559	-0.299854	6.60155e-05	2.47561	73.0552	233.131	3.0721	98.6006	0.880496	-3.55011	62.7057		176_VU102-Y9	8	4	0.00338646	12.6163	-0.299854	883.152	0.0306989	11.9499	2.47541	0.611365	74.092	0.0365661	29.51	0.414144	233.131	3.0721	98.6006	0.880496	-3.55011	62.7057
177_VU102-Y9	8	4	0.00327018	0.0375333	0	4.52247	10.2693	19.0315	0.864684	91.2864	1.6085	51.8117	7322.77		177_VU102-Y9	8	4	0.00328009	9.11684	0.0375333	7066.72	0.0549508	6.76865	4.52249	0.542415	11.2495	0.124063	2.27073	0.103706	19.0315	0.864684	91.2864	1.6085	51.8117	7322.77
178_VU102-Y9	8	4	0.0051593	0.028378	0.000728093	4.02531	108.706	214.46	2.47424	98.5997	1.43167	60.9939	11416.9		178_VU102-Y9	8	4	0.00516719	5.27999	0.028378	9359.05	0.0504471	7.32423	4.02533	0.573127	110.25	0.0224836	27.0057	0.330164	214.46	2.47424	98.5997	1.43167	60.9939	11416.9
179_VU102-Y9	8	4	0.00161138	0.361608	0	5.51264	8.95126	13.6293	0.720297	94.8519	1.96067	6.55526	96.3548		179_VU102-Y9	8	4	0.00170684	19.8445	0.361608	734.943	0.0667637	5.64284	5.51289	0.511112	9.4371	0.133308	1.62377	0.0861348	13.6293	0.720297	94.8519	1.96067	6.55526	96.3548
181_VU102-Y9	8	4	0.00213776	0.273902	0	4.86153	47.4334	80.4097	1.18617	98.6637	1.72909	7.63212	148.132		181_VU102-Y9	8	4	0.00221007	18.5951	0.273902	970.448	0.0591397	6.29336	4.86171	0.55048	48.0758	0.0434138	9.75689	0.147112	80.4097	1.18617	98.6637	1.72909	7.63212	148.132
159_VU102-Y9	8	4	0.0152153	-0.549607	0	12.3581	14.6242	9.94279	0.411662	76.2571	4.39537	-9.66867	112.187		159_VU102-Y9	8	4	0.0150702	3.42744	-0.549607	580.156	0.151205	2.74243	12.3577	0.487287	19.1776	0.0521556	1.18338	0.0491285	9.94279	0.411662	76.2571	4.39537	-9.66867	112.187
160_VU102-Y9	8	4	0.00799512	-0.316174	0	11.0616	267.174	192.958	1.8624	99.111	3.93426	-15.0439	303.965		160_VU102-Y9	8	4	0.00791165	6.40554	-0.316174	1010.26	0.135283	2.96367	11.0614	0.495814	269.571	0.0154141	24.1533	0.245619	192.958	1.8624	99.111	3.93426	-15.0439	303.965
161_VU102-Y9	8	4	0.00383677	-0.461413	0	5.98572	175.26	231.421	2.41998	99.3477	2.12893	-5.57821	77.2891		161_VU102-Y9	8	4	0.00371496	9.5367	-0.461413	692.776	0.0729715	5.2107	5.98541	0.532864	176.41	0.0161409	29.2796	0.325928	231.421	2.41998	99.3477	2.12893	-5.57821	77.2891
162_VU102-Y9	8	4	0.00744306	0.397933	0	4.99746	137.831	218.76	2.42835	98.4103	1.77744	5.40018	86.7771		162_VU102-Y9	8	4	0.00754812	5.04609	0.397933	803.464	0.0602835	6.22908	4.99773	0.550819	140.057	0.0340421	27.5802	0.324802	218.76	2.42835	98.4103	1.77744	5.40018	86.7771
163_VU102-Y9	8	4	0.00291044	0.332211	0	1.81209	2.26554	10.503	2.59225	72.2421	0.644501	2.34549	45.1119		163_VU102-Y9	8	4	0.00299814	13.5457	0.332211	961.675	0.0224251	16.4823	1.81231	0.773917	3.13604	0.436478	1.25024	0.309459	10.503	2.59225	72.2421	0.644501	2.34549	45.1119
165_VU102-Y9	8	4	0.000830239	0.105939	0.00109259	8.95278	22.309	20.8742	0.54746	98.8674	3.18422	36.3387	2190.65		165_VU102-Y9	8	4	0.000858815	39.4955	0.105939	3014.21	0.109667	3.51698	8.95285	0.505032	22.5646	0.0679894	2.49185	0.065726	20.8742	0.54746	98.8674	3.18422	36.3387	2190.65
166_VU102-Y9	8	4	0.0195534	-0.0812797	5.73122e-05	6.78216	20.5048	25.296	0.832759	77.8216	2.4122	-35.8801	2826.64		166_VU102-Y9	8	4	0.019532	3.47298	-0.0812797	3939	0.0858751	4.42137	6.7821	0.498729	26.3485	0.0617654	3.02335	0.10022	25.296	0.832759	77.8216	2.4122	-35.8801	2826.64
167_VU102-Y9	8	4	0.0146408	-0.137047	0	5.18507	151.966	231.636	2.38365	97.2013	1.84416	-16.2688	760.768		167_VU102-Y9	8	4	0.0146046	3.63518	-0.137047	2338.12	0.0648058	5.83569	5.18498	0.509483	156.342	0.0145931	29.3085	0.321073	231.636	2.38365	97.2013	1.84416	-16.2688	760.768
168_VU102-Y9	8	4	0.00564953	-0.207942	0	4.84951	5.77905	10.0123	0.966202	77.364	1.72482	-10.0282	308.688		168_VU102-Y9	8	4	0.00559463	6.92044	-0.207942	1539.1	0.0590508	6.36944	4.84937	0.565743	7.46994	0.136936	1.19168	0.115313	10.0123	0.966202	77.364	1.72482	-10.0282	308.688
169_VU102-Y9	8	4	0.00504496	-0.219163	0	7.77443	8.80464	9.51655	0.623322	85.3366	2.76512	-15.2535	444.98		169_VU102-Y9	8	4	0.0049871	9.01094	-0.219163	1458.61	0.0939972	4.08221	7.77428	0.493432	10.3175	0.134359	1.13251	0.074371	9.51655	0.623322	85.3366	2.76512	-15.2535	444.98
175_VU102-Y9	8	4	0.0247922	-0.044047	0.000282375	5.51843	154.738	222.196	2.40497	95.4321	1.96273	-53.8726	7853.66		175_VU102-Y9	8	4	0.0247807	2.62111	-0.044047	7289.1	0.0717839	5.23731	5.5184	0.534686	162.145	0.0179579	28.0403	0.32228	222.196	2.40497	95.4321	1.96273	-53.8726	7853.66
176_VU102-Y9	8	4	0.00129399	0.511858	0	3.83321	113.081	233.061	2.90403	99.6566	1.36335	3.22019	40.3405		176_VU102-Y9	8	4	0.00142912	27.3047	0.511858	626.369	0.0461958	8.07293	3.83355	0.613079	113.471	0.0239339	29.5005	0.391471	233.061	2.90403	99.6566	1.36335	3.22019	40.3405
177_VU102-Y9	8	4	0.00204155	-0.38375	0.000440755	4.43509	9.37555	17.7238	1.032	93.8598	1.57742	-4.96962	83.1205		177_VU102-Y9	8	4	0.00194049	15.1114	-0.38375	836.286	0.0545345	6.85002	4.43483	0.628359	9.98889	0.0932951	2.11395	0.123685	17.7238	1.032	93.8598	1.57742	-4.96962	83.1205
178_VU102-Y9	8	4	0.0144016	-0.185421	0	26.4659	779.887	232.817	2.13113	99.4488	9.41309	-61.3758	2124.9		178_VU102-Y9	8	4	0.0143526	3.71308	-0.185421	1731.05	0.320725	1.54004	26.4658	0.485701	784.209	0.0104857	29.4676	0.287244	232.817	2.13113	99.4488	9.41309	-61.3758	2124.9
179_VU102-Y9	8	4	0.00359099	0.169363	0.000677929	3.66898	107.84	232.258	2.98022	99.0127	1.30494	9.31525	353.621		179_VU102-Y9	8	4	0.00363608	9.37926	0.169363	1898.07	0.0457862	8.15572	3.66909	0.631159	108.915	0.02543	29.3923	0.401566	232.258	2.98022	99.0127	1.30494	9.31525	353.621
119_VU102-Y9	8	4	0.00395462	-1.06729	0.00111248	20.9298	25.1671	10.1026	0.25274	95.4536	7.44406	-8.43241	5.85139		119_VU102-Y9	8	4	0.00367354	8.32697	-1.06729	34.6681	0.255318	1.91818	20.9291	0.962663	26.3658	0.0363777	1.20245	0.0301651	10.1026	0.25274	95.4536	7.44406	-8.43241	5.85139
121_VU102-Y9	8	4	0.0268208	-1.12122	5.38437e-05	0.137917	3.03711	176.721	39.934	27.498	0.0490526	-0.0528928	0.0431309		121_VU102-Y9	8	4	0.0265248	3.88129	-1.12122	40.3152	0.00677974	3.43201	0.137162	6.03216	11.0448	0.0714893	22.0213	5.22015	176.721	39.934	27.498	0.0490526	-0.0528928	0.0431309
122_VU102-Y9	8	4	0.00324402	-0.967259	0	4.82351	139.567	228.86	5.21223	99.3079	1.71557	-2.14432	2.17849		122_VU102-Y9	8	4	0.00298866	10.0873	-0.967259	50.7775	0.0585151	1.99072	4.82286	0.980892	140.54	0.0231612	28.9348	0.701013	228.86	5.21223	99.3079	1.71557	-2.14432	2.17849
123_VU102-Y9	8	4	0.00301038	0.581526	0.000194406	4.97813	145.834	231.536	5.25227	99.3846	1.77056	3.68099	7.36453		123_VU102-Y9	8	4	0.00316402	12.7639	0.581526	100.025	0.061047	1.97906	4.97852	0.974248	146.737	0.0259388	29.295	0.707432	231.536	5.25227	99.3846	1.77056	3.68099	7.36453
124_VU102-Y9	8	4	0.00385376	-0.995642	0	7.49419	12.6938	14.2149	0.419238	91.6465	2.66545	-3.23661	2.66567		124_VU102-Y9	8	4	0.00359091	9.78681	-0.995642	41.1564	0.0905836	1.94165	7.49352	0.969288	13.8508	0.0582157	1.69381	0.0501494	14.2149	0.419238	91.6465	2.66545	-3.23661	2.66567
126_VU102-Y9	8	4	0.00188788	-0.828841	0	9.74349	11.5001	9.91687	0.293787	95.2616	3.46545	-5.05489	5.49436		126_VU102-Y9	8	4	0.00166907	18.9819	-0.828841	54.3293	0.117346	1.93952	9.74293	0.96314	12.0721	0.0773692	1.18028	0.0350605	9.91687	0.293787	95.2616	3.46545	-5.05489	5.49436
127_VU102-Y9	8	4	0.00243843	-0.583116	0	11.6906	12.7066	9.13427	0.249255	94.5103	4.15798	-8.62086	11.1193		127_VU102-Y9	8	4	0.00228448	11.5096	-0.583116	64.4754	0.141312	1.96358	11.6902	0.963376	13.4447	0.0772891	1.08691	0.0297334	9.13427	0.249255	94.5103	4.15798	-8.62086	11.1193
128_VU102-Y9	8	4	0.00143815	-0.434687	0	4.8258	5.05215	8.7989	0.397438	92.0972	1.71639	-4.77377	8.22956		128_VU102-Y9	8	4	0.00132339	23.241	-0.434687	86.1843	0.0585328	1.98314	4.82551	0.969223	5.48568	0.185201	1.0469	0.0474013	8.7989	0.397438	92.0972	1.71639	-4.77377	8.22956
129_VU102-Y9	8	4	0.00722671	-0.426154	0	15.2739	455.903	235.64	5.28799	99.5261	5.43245	-15.4118	30.841		129_VU102-Y9	8	4	0.00711421	5.25634	-0.426154	100.047	0.185236	1.91494	15.2736	0.963577	458.074	0.027765	29.8484	0.713841	235.64	5.28799	99.5261	5.43245	-15.4118	30.841
131_VU102-Y9	8	4	0.00529099	-0.723529	0	6.64301	194.398	231.303	5.22292	99.1911	2.36271	-3.948	4.95535		131_VU102-Y9	8	4	0.00509998	9.66221	-0.723529	62.7422	0.0803627	2.08318	6.64252	0.968554	195.984	0.0176073	29.2636	0.703389	231.303	5.22292	99.1911	2.36271	-3.948	4.95535
		S	0.258882	-6.3478	0.00573811	281.161	4116.1										S	0.25721	1.09514	-6.3478	254.445	3.43762	0.64949	281.157	0.136952	4193.63	0.00499113
Information on Analysis				Results		40(r)/39(k)	± 2s	Age	± 2s	MSWD	39Ar(k)	K/Ca	± 2s		Information on Analysis and Constants Used in Calculations									Results		40(a)/36(a)	± 2s	40(r)/39(k)	± 2s	Age	± 2s	MSWD	39Ar(k)	K/Ca	± 2s
								(Ma)			(%,n)																			(Ma)			(%,n)
Sample = P1(Y9)				Age Plateau Error Mean		2.08311	1.35618	17.4665	11.3185	11603.5	100	-0.0557488	0.0431107		Sample = P1(Y9)				Age Equations = Conventional					Age Plateau Error Mean				2.08311	1.35618	17.4665	11.3185	11603.5	100	-0.0557488	0.0431107
Material = muscovite							0.651033		0.648015	0	40				Material = muscovite				Negative Intensities = Allowed										0.651033		0.648015	0	40
Location = China				Minimal External Error					11.3237	1.45291	2σ Confidence Limit				Location = China				Decay Constant 40K = 5.460 ± 0.053 E-10 1/a					Minimal External Error							11.3237	1.45291	2σ Confidence Limit
Analyst = Xilin Sun				Analytical Error					11.3172	107.72	Error Magnification				Analyst = Xilin Sun				Decay Constant 39Ar = 2.940 ± 0.016 E-07 1/h					Analytical Error							11.3172	107.72	Error Magnification
Project = VU102															Project = VU102				Decay Constant 37Ar = 8.230 ± 0.012 E-04 1/h
Mass Discrimination Law = EXP				Total Fusion Age		14.6397	0.0480816	119.362	1.21629		40	-19.0458	96.9225		Mass Discrimination Law = EXP				Decay Constant 36Cl = 2.257 ± 0.015 E-06 1/a					Total Fusion Age				14.6397	0.0480816	119.362	1.21629		40	-19.0458	96.9225
Irradiation = VU102							0.00328434		0.0101899						Irradiation = VU102				Atmospheric Ratio 40/36(a) = 298.56 ± 0.31										0.00328434		0.0101899
J = 0.00460000 ± 0.00002300				Minimal External Error					2.63467						J = 0.00460000 ± 0.00002300				Atmospheric Ratio 38/36(a) = 0.1885 ± 0.0003					Minimal External Error							2.63467
DRA = 25.520 ± 0.08 Ma				Analytical Error					0.379525						DRA = 25.520 ± 0.08 Ma				Production Ratio 39/37(ca) = 0.000673 ± 0.000004					Analytical Error							0.379525
															IGSN = Undefined				Production Ratio 36/37(ca) = 0.000264 ± 0.000002
															Preferred Age = Undefined				Production Ratio 40/39(k) = 0.000860 ± 0.000070					Normal Isochron No Convergence		475.018	243.863	1.04514	0.202532	8.78412	1.70041	79.1151	71.2122
															Classification = Undefined				Production Ratio 38/39(k) = 0.012110 ± 0.000030								0.513376		0.193784		0.193577	0	25
															Experiment Type = Undefined				Production Ratio 36/38(cl) = 262.80 ± 1.71					Minimal External Error							1.70908	1.58977	2σ Confidence Limit
															Extraction Method = Undefined				Scaling Ratio K/Ca = 0.430					Analytical Error							1.69815	8.89467	Error Magnification
															Heating = 8 sec																100		Number of Iterations
															Isolation = 8.00 min																0.000219677		Convergence
															Instrument = HELIX
															Lithology = Undefined									Inverse Isochron Error Chron		78978.4	83300.6	-18.9605	20.2613	-167.14	187.019	77.0868	71.2122
															Lat-Lon = Undefined - Undefined												1.05473		1.06861		1.11893	0	25
															Feature = Undefined									Minimal External Error							187.047	1.58977	2σ Confidence Limit
																								Analytical Error							187.011	8.77991	Error Magnification
																															6		Number of Iterations
																															0.0053318		Convergence
																															16.4557		Spreading Factor

## Sheet: P4(Helix)
VUA Helix MC
Total fusion			36Ar(a) [fA]	37Ar(ca) [fA]	38Ar(cl) [fA]	39Ar(k) [fA]	40Ar(r) [fA]	Age	± 2s	40Ar(r)	39Ar(k)	K/Ca	± 2s			Relative Abundances			36Ar(a) [fA]	%1s	37Ar(ca) [fA]	%1s	38Ar(cl) [fA]	%1s	39Ar(k) [fA]	%1s	40Ar(r) [fA]	%1s	40(r)/39(k)	± 2s	Age	± 2s	40Ar(r)	39Ar(k)	K/Ca	± 2s
								(Ma)		(%)	(%)																				(Ma)		(%)	(%)
182_VU102-Y10	8	4	0.0320505	0.116448	0.000777879	5.64567	162.96	228.337	2.43987	94.451	2.90269	20.8474	949.772		182_VU102-Y10	8	4	0.0320817	2.69012	0.116448	2277.91	0.0751885	4.99446	5.64575	0.52927	172.534	0.0160883	28.8646	0.328054	228.337	2.43987	94.451	2.90269	20.8474	949.772
183_VU102-Y10	8	4	0.00777957	0.405739	0	1.74386	48.5887	220.871	3.88287	95.435	0.896595	1.84813	24.2024		183_VU102-Y10	8	4	0.00788668	4.95325	0.405739	654.779	0.0220781	16.6113	1.74413	0.784578	50.9128	0.0294559	27.8627	0.51995	220.871	3.88287	95.435	0.896595	1.84813	24.2024
184_VU102-Y10	8	4	0.00548951	0.426231	0.000807033	3.20585	90.5532	223.733	2.8977	98.2193	1.64827	3.23419	40.4022		184_VU102-Y10	8	4	0.00560247	7.89508	0.426231	624.61	0.0406646	9.03931	3.20613	0.627936	92.1949	0.0276192	28.2463	0.388634	223.733	2.8977	98.2193	1.64827	3.23419	40.4022
185_VU102-Y10	8	4	0.00477489	0.0230079	0.000216166	1.49496	43.6398	230.766	4.41694	96.8339	0.768624	27.9396	6453.46		185_VU102-Y10	8	4	0.00478108	7.52834	0.0230079	11548.9	0.0192202	19.0172	1.49497	0.854577	45.0667	0.0421022	29.1914	0.594671	230.766	4.41694	96.8339	0.768624	27.9396	6453.46
187_VU102-Y10	8	4	0.00527509	-0.50336	0.00127168	7.25731	208.326	227.155	2.26768	99.2467	3.73131	-6.19963	65.608		187_VU102-Y10	8	4	0.00514289	7.55749	-0.50336	529.128	0.0901521	4.25107	7.25698	0.516939	209.907	0.0246876	28.7056	0.304706	227.155	2.26768	99.2467	3.73131	-6.19963	65.608
188_VU102-Y10	8	4	0.00302078	-0.292659	0.000449393	3.13965	89.6738	226.084	2.87085	99.0013	1.61423	-4.61304	83.9814		188_VU102-Y10	8	4	0.00294376	9.7019	-0.292659	910.26	0.0390399	9.37991	3.13945	0.622546	90.5784	0.0287633	28.5618	0.385527	226.084	2.87085	99.0013	1.61423	-4.61304	83.9814
189_VU102-Y10	8	4	0.0101951	-0.548227	0	10.0177	284.362	224.775	2.13409	98.938	5.15053	-7.85733	76.3431		189_VU102-Y10	8	4	0.0100504	4.58559	-0.548227	485.807	0.12177	3.21847	10.0173	0.495927	287.415	0.0204277	28.386	0.286383	224.775	2.13409	98.938	5.15053	-7.85733	76.3431
190_VU102-Y10	8	4	0.0154683	-0.27748	0.000300545	1.39	39.86	226.937	5.15382	89.6145	0.714659	-2.15403	41.3547		190_VU102-Y10	8	4	0.0153952	4.19577	-0.27748	959.94	0.0200492	18.2209	1.38981	0.962579	44.4794	0.0492154	28.6763	0.69243	226.937	5.15382	89.6145	0.714659	-2.15403	41.3547
191_VU102-Y10	8	4	0.0048667	-0.357443	0	5.22827	5.82924	9.36931	0.752751	79.998	2.68809	-6.28956	93.7581		191_VU102-Y10	8	4	0.00477233	7.01095	-0.357443	745.347	0.0633909	5.92113	5.22803	0.506017	7.28674	0.175663	1.11495	0.0898065	9.36931	0.752751	79.998	2.68809	-6.28956	93.7581
193_VU102-Y10	8	4	0.0224074	0.147916	0.000780722	4.20813	120.385	226.426	2.66143	94.7327	2.16359	12.2333	441.551		193_VU102-Y10	8	4	0.0224468	2.55583	0.147916	1804.71	0.055965	6.63053	4.20823	0.580587	127.079	0.0233314	28.6077	0.357471	226.426	2.66143	94.7327	2.16359	12.2333	441.551
194_VU102-Y10	8	4	0.00255327	0.0423774	0	2.52357	71.4375	224.194	3.12008	98.9412	1.29748	25.6065	3227.83		194_VU102-Y10	8	4	0.00256446	14.7959	0.0423774	6302.75	0.0308635	11.8723	2.5236	0.654411	72.202	0.0347706	28.3081	0.418564	224.194	3.12008	98.9412	1.29748	25.6065	3227.83
195_VU102-Y10	8	4	0.00396524	-0.148888	0	4.28815	95.1983	178.09	2.03994	98.7679	2.20473	-12.3845	443.552		195_VU102-Y10	8	4	0.00392593	10.4001	-0.148888	1790.75	0.0518561	7.22255	4.28805	0.541115	96.3859	0.0389966	22.2003	0.266859	178.09	2.03994	98.7679	2.20473	-12.3845	443.552
196_VU102-Y10	8	4	0.0127162	-0.128334	0	10.7682	306.719	225.504	2.15138	98.7744	5.5364	-36.0802	1502.26		196_VU102-Y10	8	4	0.0126823	3.5975	-0.128334	2081.84	0.131881	2.97676	10.7681	0.499625	310.525	0.0208627	28.4839	0.288818	225.504	2.15138	98.7744	5.5364	-36.0802	1502.26
197_VU102-Y10	8	4	0.00799232	0.0272624	0.000560056	1.26453	36.8359	230.311	4.67166	93.9136	0.650153	19.945	3903.61		197_VU102-Y10	8	4	0.00799983	5.28496	0.0272624	9785.94	0.0173801	20.9902	1.26455	0.835808	39.2232	0.0497193	29.13	0.628809	230.311	4.67166	93.9136	0.650153	19.945	3903.61
203_VU102-Y10	8	4	0.00247931	-0.247039	0.000876451	2.13726	62.2001	230.108	3.95543	98.821	1.09886	-3.72015	80.5578		203_VU102-Y10	8	4	0.00241457	16.1848	-0.247039	1082.72	0.027226	13.4798	2.13709	0.824047	62.9422	0.0190579	29.1027	0.532345	230.108	3.95543	98.821	1.09886	-3.72015	80.5578
181_VU102-Y10	8	4	0.00618104	-0.334296	0	5.71566	162.958	225.704	2.28918	98.8773	2.93867	-7.35197	141.511		181_VU102-Y10	8	4	0.00609278	5.91266	-0.334296	962.399	0.0694631	5.4446	5.71543	0.510333	164.808	0.0100224	28.5107	0.30735	225.704	2.28918	98.8773	2.93867	-7.35197	141.511
182_VU102-Y10	8	4	0.00311779	-0.224963	0	6.87017	196.145	225.998	2.20128	99.5247	3.53226	-13.1318	376.179		182_VU102-Y10	8	4	0.0030584	10.1194	-0.224963	1432.32	0.083107	4.60828	6.87002	0.497104	197.082	0.0299996	28.5503	0.295597	225.998	2.20128	99.5247	3.53226	-13.1318	376.179
183_VU102-Y10	8	4	0.0442844	-0.0674425	0	8.607	242.011	222.776	2.1819	94.817	4.42524	-54.8765	5243.61		183_VU102-Y10	8	4	0.0442666	2.35106	-0.0674425	4777.65	0.112043	3.4639	8.60695	0.492017	255.24	0.015143	28.1179	0.292479	222.776	2.1819	94.817	4.42524	-54.8765	5243.61
184_VU102-Y10	8	4	0.0187345	-0.3292	6.61529e-05	3.2485	91.6245	223.427	3.00947	94.2439	1.6702	-4.24318	82.8938		184_VU102-Y10	8	4	0.0186476	3.25643	-0.3292	976.789	0.0429369	8.7115	3.24828	0.625416	97.2207	0.0220602	28.2052	0.403557	223.427	3.00947	94.2439	1.6702	-4.24318	82.8938
185_VU102-Y10	8	4	0.0344068	-0.3294	0	2.19766	64.181	230.862	3.912	86.2006	1.12991	-2.86883	56.0903		185_VU102-Y10	8	4	0.0343199	2.43557	-0.3294	977.582	0.0326971	11.3336	2.19744	0.702507	74.4554	0.0404343	29.2042	0.526716	230.862	3.912	86.2006	1.12991	-2.86883	56.0903
187_VU102-Y10	8	4	0.00717961	-0.26546	0.000471602	9.76112	280.455	227.35	2.16975	99.2385	5.01863	-15.8114	384.215		187_VU102-Y10	8	4	0.00710979	4.99283	-0.26546	1215	0.120032	3.25384	9.76095	0.497286	282.607	0.00658675	28.7318	0.291578	227.35	2.16975	99.2385	5.01863	-15.8114	384.215
188_VU102-Y10	8	4	0.00306579	-0.168965	0.000761449	1.98188	56.5278	225.79	4.28246	98.4036	1.01897	-5.04371	192.425		188_VU102-Y10	8	4	0.0030216	14.7595	-0.168965	1907.57	0.0253399	14.5588	1.98177	0.863374	57.4449	0.0349241	28.5223	0.575001	225.79	4.28246	98.4036	1.01897	-5.04371	192.425
189_VU102-Y10	8	4	0.014496	-0.44994	0	12.8079	359.573	222.451	2.09449	98.8077	6.5851	-12.2403	175.302		189_VU102-Y10	8	4	0.0143772	3.96252	-0.44994	716.085	0.156844	2.57395	12.8076	0.492186	363.912	0.0137856	28.0744	0.280713	222.451	2.09449	98.8077	6.5851	-12.2403	175.302
190_VU102-Y10	8	4	0.0115057	-0.0222717	0.00142292	2.76641	78.8867	225.742	3.30623	95.8244	1.42234	-53.4112	15453.1		190_VU102-Y10	8	4	0.0115006	3.55492	-0.0222717	14466.2	0.037093	9.97858	2.7664	0.6865	82.3242	0.0276273	28.5159	0.443912	225.742	3.30623	95.8244	1.42234	-53.4112	15453.1
191_VU102-Y10	8	4	0.00349378	0.0104612	0.00132873	5.06811	142.68	223.033	2.51049	99.2712	2.60574	208.322	128344		191_VU102-Y10	8	4	0.00349728	10.6052	0.0104612	30804.3	0.0633621	5.92526	5.06812	0.563472	143.727	0.0166156	28.1524	0.336573	223.033	2.51049	99.2712	2.60574	208.322	128344
193_VU102-Y10	8	4	0.00148024	-0.0421607	0	5.54623	5.92318	8.97548	0.856601	92.9872	2.85156	-56.5664	8672.45		193_VU102-Y10	8	4	0.00146911	27.2891	-0.0421607	7665.73	0.0674238	5.58662	5.5462	0.519699	6.36989	0.164515	1.06796	0.102174	8.97548	0.856601	92.9872	2.85156	-56.5664	8672.45
194_VU102-Y10	8	4	0.00666719	-0.0330605	0	5.77915	166.658	228.139	2.40138	98.8168	2.97132	-75.1662	14680.2		194_VU102-Y10	8	4	0.00665846	6.60947	-0.0330605	9765.14	0.0704445	5.33925	5.77913	0.531191	168.654	0.0147797	28.8379	0.322844	228.139	2.40138	98.8168	2.97132	-75.1662	14680.2
195_VU102-Y10	8	4	0.00365402	-0.0065948	0	3.23029	91.8773	225.195	2.75752	98.8236	1.66083	-210.624	206054		195_VU102-Y10	8	4	0.00365228	8.86625	-0.0065948	48915.2	0.0396611	9.4392	3.23028	0.574709	92.9711	0.0295956	28.4425	0.370129	225.195	2.75752	98.8236	1.66083	-210.624	206054
196_VU102-Y10	8	4	0.0135564	-0.0585958	0.000772378	5.10271	146.552	227.265	2.51085	97.3096	2.62353	-37.4458	4132.45		196_VU102-Y10	8	4	0.0135413	3.62682	-0.0585958	5517.91	0.0651216	5.73261	5.10267	0.550066	150.604	0.0189573	28.7204	0.3374	227.265	2.51085	97.3096	2.62353	-37.4458	4132.45
197_VU102-Y10	8	4	0.00737139	-0.191467	0.00101476	4.12161	117.665	225.983	2.61557	98.161	2.1191	-9.25639	312.454		197_VU102-Y10	8	4	0.00732141	5.74776	-0.191467	1687.78	0.0523169	7.15944	4.12148	0.563003	119.869	0.0196369	28.5483	0.351226	225.983	2.61557	98.161	2.1191	-9.25639	312.454
132_VU102-Y10	8	4	0.00302328	-0.700505	0.000209262	1.20406	35.1779	230.95	3.48593	97.4955	0.61906	-0.739102	0.864649		132_VU102-Y10	8	4	0.00283848	13.405	-0.700505	58.4887	0.0153603	1.77606	1.20359	0.728939	36.0816	0.0318737	29.2161	0.469372	230.95	3.48593	97.4955	0.61906	-0.739102	0.864649
133_VU102-Y10	8	4	0.00323896	-0.539292	0	5.91644	175.65	234.455	2.21006	99.4496	3.04191	-4.71742	5.99059		133_VU102-Y10	8	4	0.00309658	12.9796	-0.539292	63.4923	0.0708312	1.13613	5.91608	0.496657	176.622	0.0239061	29.6885	0.298149	234.455	2.21006	99.4496	3.04191	-4.71742	5.99059
134_VU102-Y10	8	4	0.00894976	-0.688062	0	5.7546	167.568	230.228	2.17041	98.4276	2.9587	-3.5963	3.56636		134_VU102-Y10	8	4	0.00876812	4.89137	-0.688062	49.5812	0.0705495	1.0169	5.75414	0.494913	170.245	0.0240282	29.1189	0.292126	230.228	2.17041	98.4276	2.9587	-3.5963	3.56636
136_VU102-Y10	8	4	0.00412504	-1.03219	0	5.1976	153.352	233.089	2.22024	99.2004	2.67232	-2.16527	1.62466		136_VU102-Y10	8	4	0.00385254	6.90202	-1.03219	37.513	0.0633093	1.14273	5.19691	0.503567	154.588	0.0253249	29.5043	0.2993	233.089	2.22024	99.2004	2.67232	-2.16527	1.62466
138_VU102-Y10	8	4	0.00705409	-1.89848	0	4.5146	133.588	233.727	2.24548	98.4451	2.32116	-1.02254	0.447699		138_VU102-Y10	8	4	0.00655289	5.57861	-1.89848	21.8857	0.0552736	1.33004	4.51332	0.50422	135.698	0.0194875	29.5903	0.302808	233.727	2.24548	98.4451	2.32116	-1.02254	0.447699
139_VU102-Y10	8	4	0.012655	-1.37292	0	7.12957	207.996	230.635	2.13791	98.213	3.66563	-2.23299	1.36347		139_VU102-Y10	8	4	0.0122926	3.48313	-1.37292	30.5262	0.0875013	1.0686	7.12865	0.488927	211.78	0.0166781	29.1736	0.287815	230.635	2.13791	98.213	3.66563	-2.23299	1.36347
142_VU102-Y10	8	4	0.00458975	-0.901888	0	7.9106	233.509	233.194	2.18614	99.4137	4.06719	-3.7716	4.1973		142_VU102-Y10	8	4	0.00435165	6.0866	-0.901888	55.6413	0.0957262	1.03321	7.91	0.497522	234.886	0.0163067	29.5185	0.294719	233.194	2.18614	99.4137	4.06719	-3.7716	4.1973
143_VU102-Y10	8	4	0.00595938	-0.5178	0.000212027	5.32391	158.379	234.9	2.21128	98.8862	2.73726	-4.42117	7.07672		143_VU102-Y10	8	4	0.00582281	6.46336	-0.5178	80.0306	0.065808	1.05013	5.32357	0.495605	160.162	0.0207037	29.7485	0.298387	234.9	2.21128	98.8862	2.73726	-4.42117	7.07672
144_VU102-Y10	8	4	0.00926423	-0.0282669	0	4.429	130.155	232.218	2.23074	97.9163	2.27714	-67.3744	1767.84		144_VU102-Y10	8	4	0.00925677	3.4475	-0.0282669	1311.95	0.0552475	1.14535	4.42898	0.504538	132.924	0.0321229	29.3869	0.300571	232.218	2.23074	97.9163	2.27714	-67.3744	1767.84
		S	0.379088	-11.5072	0.0122992	194.498	5265.66										S	0.376057	0.787749	-11.5072	141.17	2.42422	0.854182	194.49	0.0949833	5379.01	0.00382802
Information on Analysis				Results		40(r)/39(k)	± 2s	Age	± 2s	MSWD	39Ar(k)	K/Ca	± 2s		Information on Analysis and Constants Used in Calculations									Results		40(a)/36(a)	± 2s	40(r)/39(k)	± 2s	Age	± 2s	MSWD	39Ar(k)	K/Ca	± 2s
								(Ma)			(%,n)																			(Ma)			(%,n)
Sample = P4(Y10)				Age Plateau Error Mean		17.2237	4.3935	139.646	34.3238	10302.1	100	-1.18851	0.366838		Sample = P4(Y10)				Age Equations = Conventional					Age Plateau Error Mean				17.2237	4.3935	139.646	34.3238	10302.1	100	-1.18851	0.366838
Material = muscovite							0.255084		0.245791	0	39				Material = muscovite				Negative Intensities = Allowed										0.255084		0.245791	0	39
Location = China				Minimal External Error					34.4325	1.45883	2σ Confidence Limit				Location = China				Decay Constant 40K = 5.460 ± 0.053 E-10 1/a					Minimal External Error							34.4325	1.45883	2σ Confidence Limit
Analyst = Xilin Sun				Analytical Error					34.2975	101.499	Error Magnification				Analyst = Xilin Sun				Decay Constant 39Ar = 2.940 ± 0.016 E-07 1/h					Analytical Error							34.2975	101.499	Error Magnification
Project = VU102															Project = VU102				Decay Constant 37Ar = 8.230 ± 0.012 E-04 1/h
Mass Discrimination Law = EXP				Total Fusion Age		27.0731	0.053988	214.965	2.06822		39	-7.26797	20.5204		Mass Discrimination Law = EXP				Decay Constant 36Cl = 2.257 ± 0.015 E-06 1/a					Total Fusion Age				27.0731	0.053988	214.965	2.06822		39	-7.26797	20.5204
Irradiation = VU102							0.00199416		0.00962123						Irradiation = VU102				Atmospheric Ratio 40/36(a) = 298.56 ± 0.31										0.00199416		0.00962123
J = 0.00460000 ± 0.00002300				Minimal External Error					4.6897						J = 0.00460000 ± 0.00002300				Atmospheric Ratio 38/36(a) = 0.1885 ± 0.0003					Minimal External Error							4.6897
DRA = 25.520 ± 0.08 Ma				Analytical Error					0.404473						DRA = 25.520 ± 0.08 Ma				Production Ratio 39/37(ca) = 0.000673 ± 0.000004					Analytical Error							0.404473
															IGSN = Undefined				Production Ratio 36/37(ca) = 0.000264 ± 0.000002
															Preferred Age = Undefined				Production Ratio 40/39(k) = 0.000860 ± 0.000070					Normal Isochron No Convergence		827.4	366.419	25.6032	1.51432	203.919	11.5758	69.2104	66.9338
															Classification = Undefined				Production Ratio 38/39(k) = 0.012110 ± 0.000030								0.442856		0.0591459		0.0567665	0	24
															Experiment Type = Undefined				Production Ratio 36/38(cl) = 262.80 ± 1.71					Minimal External Error							12.245	1.60302	2σ Confidence Limit
															Extraction Method = Undefined				Scaling Ratio K/Ca = 0.430					Analytical Error							11.4138	8.31928	Error Magnification
															Heating = 8 sec																100		Number of Iterations
															Isolation = 8.00 min																0.0354769		Convergence
															Instrument = HELIX
															Lithology = Undefined									Inverse Isochron Error Chron		22620.4	63906.7	3.12854	1.52957	26.1698	12.7063	> 100	66.9338
															Lat-Lon = Undefined - Undefined												2.82518		0.488908		0.485533	0	24
															Feature = Undefined									Minimal External Error							12.7166	1.60302	2σ Confidence Limit
																								Analytical Error							12.7037	> 10	Error Magnification
																															11		Number of Iterations
																															0.041193		Convergence
																															2.6337		Spreading Factor

## Sheet: P5(Helix)
VUA Helix MC
Total fusion			36Ar(a) [fA]	37Ar(ca) [fA]	38Ar(cl) [fA]	39Ar(k) [fA]	40Ar(r) [fA]	Age	± 2s	40Ar(r)	39Ar(k)	K/Ca	± 2s			Relative Abundances			36Ar(a) [fA]	%1s	37Ar(ca) [fA]	%1s	38Ar(cl) [fA]	%1s	39Ar(k) [fA]	%1s	40Ar(r) [fA]	%1s	40(r)/39(k)	± 2s	Age	± 2s	40Ar(r)	39Ar(k)	K/Ca	± 2s
								(Ma)		(%)	(%)																				(Ma)		(%)	(%)
204_VU102-Y11	8	4	0.000654741	-0.316984	8.57684e-05	1.04144	28.2586	215.421	7.43178	99.3099	0.272749	-1.41276	23.8553		204_VU102-Y11	8	4	0.000571104	43.7458	-0.316984	844.28	0.0128211	28.3695	1.04123	1.63805	28.455	0.0631096	27.134	0.992223	215.421	7.43178	99.3099	0.272749	-1.41276	23.8553
205_VU102-Y11	8	4	0.00241227	0.0574979	0	2.92929	4.8125	13.7892	1.33781	86.9431	0.767164	21.9068	2041.92		205_VU102-Y11	8	4	0.00242745	13.2795	0.0574979	4660.49	0.0351943	10.3968	2.92932	0.624799	5.53522	0.201465	1.64289	0.159992	13.7892	1.33781	86.9431	0.767164	21.9068	2041.92
206_VU102-Y11	8	4	0.000382554	-0.361747	0.000819748	1.08672	31.6857	230.512	5.7197	99.6379	0.284607	-1.29176	19.1422		206_VU102-Y11	8	4	0.000287498	90.324	-0.361747	740.932	0.0140521	25.967	1.08648	1.09967	31.8008	0.0513088	29.1571	0.769959	230.512	5.7197	99.6379	0.284607	-1.29176	19.1422
207_VU102-Y11	8	4	0.00658308	-0.542186	0	8.9003	12.4618	11.7583	0.466827	86.331	2.33094	-7.0587	69.764		207_VU102-Y11	8	4	0.00643994	5.92586	-0.542186	494.17	0.107126	3.5691	8.89993	0.500941	14.4349	0.0697917	1.40015	0.0557672	11.7583	0.466827	86.331	2.33094	-7.0587	69.764
210_VU102-Y11	8	4	0.00102233	-0.206667	0	3.09526	78.8625	202.979	2.50224	99.6111	0.810633	-6.44012	166.967		210_VU102-Y11	8	4	0.000967768	28.7072	-0.206667	1296.3	0.0369722	9.93874	3.09512	0.580073	79.1704	0.0374597	25.4784	0.331815	202.979	2.50224	99.6111	0.810633	-6.44012	166.967
211_VU102-Y11	8	4	0.00535532	0.048984	0	9.20954	246.393	212.573	2.0379	99.3521	2.41193	80.8448	8833.45		211_VU102-Y11	8	4	0.00536826	6.30837	0.048984	5463.21	0.112032	3.5003	9.20957	0.49823	248	0.011032	26.7541	0.271658	212.573	2.0379	99.3521	2.41193	80.8448	8833.45
212_VU102-Y11	8	4	0.00116381	0.0836523	0	3.11996	81.6929	208.291	2.65323	99.5732	0.817101	16.0376	1027.73		212_VU102-Y11	8	4	0.0011859	32.755	0.0836523	3204.12	0.0378748	9.71088	3.12002	0.602677	82.0431	0.0201227	26.184	0.352858	208.291	2.65323	99.5732	0.817101	16.0376	1027.73
213_VU102-Y11	8	4	0.00152105	0.198958	0	3.17044	79.9705	201.057	2.48294	99.432	0.830322	6.85214	184.628		213_VU102-Y11	8	4	0.00157358	20.4656	0.198958	1347.23	0.038615	9.55451	3.17057	0.580263	80.4274	0.0291581	25.2238	0.328909	201.057	2.48294	99.432	0.830322	6.85214	184.628
215_VU102-Y11	8	4	0.0163273	0.140032	0	8.54323	253.667	234.482	2.26534	98.1118	2.23743	26.2339	1005.84		215_VU102-Y11	8	4	0.0163643	3.40366	0.140032	1917.05	0.106246	3.57861	8.54333	0.502848	258.549	0.0164163	29.6922	0.305612	234.482	2.26534	98.1118	2.23743	26.2339	1005.84
216_VU102-Y11	8	4	0.019026	0.0732654	0	30.717	61.7309	16.8535	0.223965	91.5377	8.04462	180.28	13227.1		216_VU102-Y11	8	4	0.0190453	3.25809	0.0732654	3668.47	0.373369	1.3972	30.717	0.485946	67.4377	0.034858	2.00967	0.0268294	16.8535	0.223965	91.5377	8.04462	180.28	13227.1
217_VU102-Y11	8	4	0.0028676	-0.0821669	0.00116872	0.823021	23.0111	221.593	7.7254	96.41	0.215545	-4.30708	282.203		217_VU102-Y11	8	4	0.00284654	12.1655	-0.0821669	3276.04	0.011676	31.1593	0.822966	1.52232	23.868	0.0839637	27.9594	1.03491	221.593	7.7254	96.41	0.215545	-4.30708	282.203
218_VU102-Y11	8	4	0.00630325	0.0446482	0.00171786	6.98976	202.098	228.701	2.24737	99.0745	1.83058	67.3173	8095.71		218_VU102-Y11	8	4	0.00631597	6.44283	0.0446482	6013.09	0.087552	4.34229	6.98979	0.507679	203.986	0.0131083	28.9135	0.302232	228.701	2.24737	99.0745	1.83058	67.3173	8095.71
219_VU102-Y11	8	4	0.00132233	0.263773	0.00103299	0.557346	14.9316	212.846	9.44435	97.421	0.145966	0.908579	18.5024		219_VU102-Y11	8	4	0.00139253	22.4595	0.263773	1018.21	0.00803171	45.3047	0.557524	1.73272	15.3268	0.106662	26.7905	1.25915	212.846	9.44435	97.421	0.145966	0.908579	18.5024
221_VU102-Y11	8	4	0.00355301	0.345228	0	10.1587	259.107	203.185	1.95014	99.5889	2.66052	12.6532	197.228		221_VU102-Y11	8	4	0.00364415	10.5088	0.345228	779.36	0.122191	3.14881	10.159	0.497825	260.177	0.0156782	25.5059	0.258632	203.185	1.95014	99.5889	2.66052	12.6532	197.228
203_VU102-Y11	8	4	0.00727928	-0.329913	0	5.52739	144.39	207.831	2.21916	98.514	1.44759	-7.20426	141.908		203_VU102-Y11	8	4	0.00719219	5.55926	-0.329913	984.892	0.0682214	5.53885	5.52717	0.527615	146.569	0.0265321	26.1227	0.295057	207.831	2.21916	98.514	1.44759	-7.20426	141.908
204_VU102-Y11	8	4	0.0153452	0.230876	0	16.2389	462.761	225.603	2.09453	99.0167	4.25287	30.2445	849.731		204_VU102-Y11	8	4	0.0154061	3.31362	0.230876	1404.77	0.196524	2.13055	16.239	0.488459	467.357	0.022449	28.4971	0.281201	225.603	2.09453	99.0167	4.25287	30.2445	849.731
205_VU102-Y11	8	4	0.0148656	-0.032506	0.000365991	21.7445	24.728	9.55592	0.249078	84.7286	5.69476	-287.642	57381.5		205_VU102-Y11	8	4	0.0148572	3.52365	-0.032506	9974.44	0.266493	1.72444	21.7444	0.484716	29.185	0.0558924	1.13721	0.0297192	9.55592	0.249078	84.7286	5.69476	-287.642	57381.5
206_VU102-Y11	8	4	0.0243525	-0.266065	0.00189801	9.68073	272.041	222.652	2.20449	97.394	2.53533	-15.6455	380.919		206_VU102-Y11	8	4	0.0242833	2.66766	-0.266065	1217.35	0.123722	3.18897	9.68055	0.509625	279.32	0.0470357	28.1013	0.295487	222.652	2.20449	97.394	2.53533	-15.6455	380.919
207_VU102-Y11	8	4	0.0160287	-0.408427	0.00157366	8.08183	18.2554	18.9321	0.69656	79.2064	2.11659	-8.50872	135.042		207_VU102-Y11	8	4	0.0159218	4.21355	-0.408427	793.55	0.102466	3.78264	8.08155	0.497204	23.0478	0.0734112	2.25882	0.0835377	18.9321	0.69656	79.2064	2.11659	-8.50872	135.042
209_VU102-Y11	8	4	0.0336654	0.0880891	0.000338143	20.3643	553.088	215.613	1.99161	98.2121	5.3333	99.4067	7320.24		209_VU102-Y11	8	4	0.0336889	2.35725	0.0880891	3681.96	0.253296	1.81031	20.3644	0.485285	563.156	0.00883024	27.1597	0.26593	215.613	1.99161	98.2121	5.3333	99.4067	7320.24
210_VU102-Y11	8	4	0.00594134	0.478502	0	15.6647	396.261	201.606	1.88004	99.551	4.1025	14.0769	191.126		210_VU102-Y11	8	4	0.00606767	7.00108	0.478502	678.862	0.187597	2.25009	15.665	0.486704	398.049	0.0130685	25.2964	0.249119	201.606	1.88004	99.551	4.1025	14.0769	191.126
211_VU102-Y11	8	4	0.00886316	-0.104524	0	6.53177	178.855	217.28	2.25666	98.539	1.71064	-26.871	1668.69		211_VU102-Y11	8	4	0.00883557	5.17563	-0.104524	3105.01	0.079472	4.79768	6.5317	0.52505	181.507	0.0141773	27.3823	0.301595	217.28	2.25666	98.539	1.71064	-26.871	1668.69
212_VU102-Y11	8	4	0.00401005	-0.0783203	0	14.5649	339.229	186.407	1.77143	99.6446	3.81446	-79.9652	6639.79		212_VU102-Y11	8	4	0.00398937	9.51949	-0.0783203	4151.68	0.176433	2.32146	14.5648	0.492078	340.439	0.0233727	23.2909	0.232788	186.407	1.77143	99.6446	3.81446	-79.9652	6639.79
213_VU102-Y11	8	4	0.0248287	-0.326063	0.0025254	16.778	427.942	203.188	1.90998	98.294	4.39406	-22.1262	441.747		213_VU102-Y11	8	4	0.024744	2.91808	-0.326063	998.245	0.210387	2.04975	16.7778	0.490043	435.369	0.0110374	25.5062	0.253305	203.188	1.90998	98.294	4.39406	-22.1262	441.747
215_VU102-Y11	8	4	0.0149369	0.0924502	0.000685263	9.08383	265.337	230.903	2.21902	98.3442	2.37901	42.2503	2977.2		215_VU102-Y11	8	4	0.0149617	3.07979	0.0924502	3523.29	0.113506	3.41795	9.08389	0.498723	269.804	0.0139337	29.2098	0.298778	230.903	2.21902	98.3442	2.37901	42.2503	2977.2
216_VU102-Y11	8	4	0.0290376	-0.0837881	0	21.0627	536.396	202.889	1.87975	98.4062	5.51622	-108.094	8396.33		216_VU102-Y11	8	4	0.0290155	2.58251	-0.0837881	3883.81	0.259108	1.76211	21.0627	0.48502	545.084	0.0103733	25.4666	0.249256	202.889	1.87975	98.4062	5.51622	-108.094	8396.33
217_VU102-Y11	8	4	0.00522396	0.220672	0	7.24289	206.344	225.544	2.2502	99.2468	1.89688	14.1134	416.073		217_VU102-Y11	8	4	0.00528222	7.57732	0.220672	1474.03	0.0870804	4.40861	7.24304	0.509086	207.91	0.0466541	28.4892	0.302091	225.544	2.2502	99.2468	1.89688	14.1134	416.073
218_VU102-Y11	8	4	0.0300026	-0.00811049	0	13.358	368.83	218.992	2.08021	97.626	3.49839	-708.211	568489		218_VU102-Y11	8	4	0.0300005	2.13821	-0.00811049	40135.6	0.165309	2.48204	13.358	0.494373	377.799	0.0403944	27.6112	0.278272	218.992	2.08021	97.626	3.49839	-708.211	568489
219_VU102-Y11	8	4	0.00318264	0.00674449	0	6.13945	7.9485	10.875	0.815667	89.269	1.60789	391.426	378362		219_VU102-Y11	8	4	0.00318442	15.3781	0.00674449	48331.3	0.0740526	5.22883	6.13946	0.534674	8.90399	0.15005	1.29466	0.0973927	10.875	0.815667	89.269	1.60789	391.426	378362
145_VU102-Y11	8	4	0.0118384	-1.04295	0	11.5097	13.6372	9.95506	0.307097	79.3711	3.01433	-4.74536	3.87094		145_VU102-Y11	8	4	0.011563	4.66908	-1.04295	40.7752	0.141087	1.93568	11.509	0.963676	17.1815	0.0571247	1.18484	0.0366498	9.95506	0.307097	79.3711	3.01433	-4.74536	3.87094
151_VU102-Y11	8	4	0.0101521	-1.25442	0	7.18428	317.321	338.764	5.99073	99.0519	1.88152	-2.46268	1.38243		151_VU102-Y11	8	4	0.00982089	4.6925	-1.25442	28.051	0.0881364	1.94453	7.18343	0.967478	320.358	0.0148044	44.1688	0.855547	338.764	5.99073	99.0519	1.88152	-2.46268	1.38243
152_VU102-Y11	8	4	0.0109302	-0.922814	0	16.1585	480.304	234.722	4.24343	99.3223	4.23183	-7.52933	9.07092		152_VU102-Y11	8	4	0.0106866	5.51984	-0.922814	60.2296	0.19619	1.94466	16.1579	0.962266	483.581	0.0147909	29.7245	0.572546	234.722	4.24343	99.3223	4.23183	-7.52933	9.07092
153_VU102-Y11	8	4	0.00597698	-1.18519	0	11.6007	346.92	236.059	4.26872	99.4854	3.03817	-4.20888	2.85304		153_VU102-Y11	8	4	0.00566409	6.02315	-1.18519	33.8794	0.138851	1.94488	11.5999	0.96308	348.714	0.0183891	29.905	0.576379	236.059	4.26872	99.4854	3.03817	-4.20888	2.85304
154_VU102-Y11	8	4	0.00319366	0.016568	0	7.00346	19.6067	23.4355	0.500483	95.3345	1.83417	181.765	5982.25		154_VU102-Y11	8	4	0.00319803	9.36202	0.016568	1645.6	0.0848397	1.99276	7.00348	0.965809	20.5662	0.0440801	2.79957	0.0601701	23.4355	0.500483	95.3345	1.83417	181.765	5982.25
156_VU102-Y11	8	4	0.00522244	-0.395476	0	6.78291	8.32855	10.3156	0.31539	84.1812	1.77641	-7.37504	12.6301		156_VU102-Y11	8	4	0.00511804	6.20409	-0.395476	85.6221	0.0827847	1.94976	6.78264	0.968654	9.89359	0.0964782	1.22787	0.0376468	10.3156	0.31539	84.1812	1.77641	-7.37504	12.6301
157_VU102-Y11	8	4	0.00377534	-0.497435	0	11.5192	301.912	208.483	3.80048	99.6248	3.01682	-9.95759	15.2716		157_VU102-Y11	8	4	0.00364402	8.38111	-0.497435	76.677	0.140164	1.91737	11.5189	0.963686	303.049	0.0160836	26.2094	0.505486	208.483	3.80048	99.6248	3.01682	-9.95759	15.2716
158_VU102-Y11	8	4	0.00974965	-0.715664	0	14.2914	16.1749	9.51051	0.259314	84.694	3.74285	-8.58687	6.01101		158_VU102-Y11	8	4	0.00956071	5.44302	-0.715664	34.9879	0.172157	1.92352	14.291	0.962941	19.0981	0.0473968	1.13179	0.0309397	9.51051	0.259314	84.694	3.74285	-8.58687	6.01101
159_VU102-Y11	8	4	0.00774519	-0.408216	0	7.99043	233.813	231.288	4.20266	99.0178	2.09265	-8.41683	14.8152		159_VU102-Y11	8	4	0.00763743	5.85266	-0.408216	88.0041	0.0963123	1.92389	7.99015	0.964944	236.132	0.0284941	29.2616	0.565982	231.288	4.20266	99.0178	2.09265	-8.41683	14.8152
161_VU102-Y11	8	4	0.0151171	-1.02144	0	5.38633	148.972	219.337	4.0613	97.0565	1.41065	-2.26751	1.7175		161_VU102-Y11	8	4	0.0148474	4.50695	-1.02144	37.8596	0.0672742	1.98027	5.38565	0.971064	153.49	0.0603252	27.6574	0.543389	219.337	4.0613	97.0565	1.41065	-2.26751	1.7175
		S	0.389759	-8.20113	0.0122115	381.833	7468.08										S	0.387601	0.776431	-8.20113	196.824	4.67522	0.489539	381.827	0.119135	7584.77	0.00453422
Information on Analysis				Results		40(r)/39(k)	± 2s	Age	± 2s	MSWD	39Ar(k)	K/Ca	± 2s		Information on Analysis and Constants Used in Calculations									Results		40(a)/36(a)	± 2s	40(r)/39(k)	± 2s	Age	± 2s	MSWD	39Ar(k)	K/Ca	± 2s
								(Ma)			(%,n)																			(Ma)			(%,n)
Sample =P5(Y11)				Age Plateau Error Mean		2.55872	1.67208	21.4311	13.9249	17229.2	100	-3.00769	0.947172		Sample =P5(Y11)				Age Equations = Conventional					Age Plateau Error Mean				2.55872	1.67208	21.4311	13.9249	17229.2	100	-3.00769	0.947172
Material = muscovite							0.653485		0.649753	0	39				Material = muscovite				Negative Intensities = Allowed										0.653485		0.649753	0	39
Location = China				Minimal External Error					13.9312	1.45883	2σ Confidence Limit				Location = China				Decay Constant 40K = 5.460 ± 0.053 E-10 1/a					Minimal External Error							13.9312	1.45883	2σ Confidence Limit
Analyst = Xilin Sun				Analytical Error					13.9233	131.26	Error Magnification				Analyst = Xilin Sun				Decay Constant 39Ar = 2.940 ± 0.016 E-07 1/h					Analytical Error							13.9233	131.26	Error Magnification
Project = VU102															Project = VU102				Decay Constant 37Ar = 8.230 ± 0.012 E-04 1/h
Mass Discrimination Law = EXP				Total Fusion Age		19.5585	0.0473578	157.783	1.55546		39	-20.0202	78.8092		Mass Discrimination Law = EXP				Decay Constant 36Cl = 2.257 ± 0.015 E-06 1/a					Total Fusion Age				19.5585	0.0473578	157.783	1.55546		39	-20.0202	78.8092
Irradiation = VU102							0.00242134		0.00985823						Irradiation = VU102				Atmospheric Ratio 40/36(a) = 298.56 ± 0.31										0.00242134		0.00985823
J = 0.00460000 ± 0.00002300				Minimal External Error					3.45887						J = 0.00460000 ± 0.00002300				Atmospheric Ratio 38/36(a) = 0.1885 ± 0.0003					Minimal External Error							3.45887
DRA = 25.520 ± 0.08 Ma				Analytical Error					0.366051						DRA = 25.520 ± 0.08 Ma				Production Ratio 39/37(ca) = 0.000673 ± 0.000004					Analytical Error							0.366051
															IGSN = Undefined				Production Ratio 36/37(ca) = 0.000264 ± 0.000002
															Preferred Age = Undefined				Production Ratio 40/39(k) = 0.000860 ± 0.000070					Normal Isochron No Convergence		2526.55	2179.7	22.738	3.34036	182.195	25.5364	> 100	76.3399
															Classification = Undefined				Production Ratio 38/39(k) = 0.012110 ± 0.000030								0.862719		0.146907		0.14016	0	25
															Experiment Type = Undefined				Production Ratio 36/38(cl) = 262.80 ± 1.71					Minimal External Error							25.7844	1.58977	2σ Confidence Limit
															Extraction Method = Undefined				Scaling Ratio K/Ca = 0.430					Analytical Error							25.4774	> 10	Error Magnification
															Heating = 8 sec																100		Number of Iterations
															Isolation = 8.00 min																0.00293897		Convergence
															Instrument = HELIX
															Lithology = Undefined									Inverse Isochron Error Chron		186986	563735	-132.558	331.825	-1723.46	7163.93	88.9655	76.3399
															Lat-Lon = Undefined - Undefined												3.01485		2.50325		4.15672	0	25
															Feature = Undefined									Minimal External Error							7164.01	1.58977	2σ Confidence Limit
																								Analytical Error							7163.87	9.43215	Error Magnification
																															4		Number of Iterations
																															0.00867909		Convergence
																															96.2864		Spreading Factor

## Sheet: P6(Helix)
VUA Helix MC
Total fusion			36Ar(a) [fA]	37Ar(ca) [fA]	38Ar(cl) [fA]	39Ar(k) [fA]	40Ar(r) [fA]	Age	± 2s	40Ar(r)	39Ar(k)	K/Ca	± 2s			Relative Abundances			36Ar(a) [fA]	%1s	37Ar(ca) [fA]	%1s	38Ar(cl) [fA]	%1s	39Ar(k) [fA]	%1s	40Ar(r) [fA]	%1s	40(r)/39(k)	± 2s	Age	± 2s	40Ar(r)	39Ar(k)	K/Ca	± 2s
								(Ma)		(%)	(%)																				(Ma)		(%)	(%)
222_VU102-Y12	8	4	0.0115262	-0.0713821	0	2.21617	38.5838	141.65	2.79673	91.8072	1.76999	-13.35	1005.93		222_VU102-Y12	8	4	0.0115073	3.8117	-0.0713821	3767.53	0.026537	13.7313	2.21612	0.791766	42.0269	0.0384822	17.4101	0.357209	141.65	2.79673	91.8072	1.76999	-13.35	1005.93
223_VU102-Y12	8	4	0.00080222	-0.00857179	0	3.67237	61.6764	136.826	1.81001	99.6081	2.93302	-184.223	115575		223_VU102-Y12	8	4	0.000799957	44.1344	-0.00857179	31368.2	0.0435231	8.5107	3.67236	0.565577	61.919	0.0400821	16.7947	0.230573	136.826	1.81001	99.6081	2.93302	-184.223	115575
224_VU102-Y12	8	4	0.000637662	0.300754	0.000418307	1.06918	19.5625	148.578	4.97063	99.0316	0.853928	1.52865	27.3522		224_VU102-Y12	8	4	0.000717289	50.5834	0.300754	894.65	0.0134863	27.0609	1.06939	1.23197	19.7538	0.0614583	18.2966	0.637272	148.578	4.97063	99.0316	0.853928	1.52865	27.3522
225_VU102-Y12	8	4	0.000393535	0.289035	0.000369489	1.12457	17.4047	126.45	4.37771	99.324	0.898164	1.67303	31.1757		225_VU102-Y12	8	4	0.000470041	72.3871	0.289035	931.712	0.0140622	25.9373	1.12477	1.16179	17.5232	0.0707699	15.4768	0.554515	126.45	4.37771	99.324	0.898164	1.67303	31.1757
231_VU102-Y12	8	4	0.000515411	0.140464	0	1.01912	17.41	139.091	4.67168	99.1189	0.813939	3.1198	119.888		231_VU102-Y12	8	4	0.000552493	41.0898	0.140464	1921.4	0.0116263	31.3523	1.01921	1.16545	17.5647	0.0802154	17.0834	0.59585	139.091	4.67168	99.1189	0.813939	3.1198	119.888
232_VU102-Y12	8	4	0.00146206	0.0225524	0	3.28708	54.8467	135.968	1.87474	99.2053	2.6253	62.6738	15042.6		232_VU102-Y12	8	4	0.00146801	22.731	0.0225524	12000.7	0.0389068	9.46722	3.28709	0.56892	55.286	0.0252909	16.6856	0.238706	135.968	1.87474	99.2053	2.6253	62.6738	15042.6
233_VU102-Y12	8	4	0.00319228	-0.403799	0	1.96883	36.7836	151.589	2.69105	97.47	1.57245	-2.09658	28.101		233_VU102-Y12	8	4	0.00308567	11.9462	-0.403799	670.162	0.0241696	15.1885	1.96856	0.647222	37.7384	0.0462257	18.683	0.345581	151.589	2.69105	97.47	1.57245	-2.09658	28.101
235_VU102-Y12	8	4	9.9987e-05	-0.411118	0	0.9325	16.5911	144.638	5.06876	99.8156	0.744762	-0.975328	12.8185		235_VU102-Y12	8	4	-8.54817e-06	3152.8	-0.411118	657.138	0.0111855	32.6762	0.932223	1.18083	16.6217	0.0823796	17.7921	0.648457	144.638	5.06876	99.8156	0.744762	-0.975328	12.8185
237_VU102-Y12	8	4	0.00413294	0.100181	0	2.34757	42.4963	147.061	2.63815	97.1738	1.87494	10.0763	544		237_VU102-Y12	8	4	0.00415939	10.0073	0.100181	2699.4	0.0290485	12.5904	2.34763	0.725948	43.7323	0.0334526	18.1023	0.337952	147.061	2.63815	97.1738	1.87494	10.0763	544
238_VU102-Y12	8	4	0.000998038	-0.081843	1.40961e-05	2.18736	35.8608	133.681	2.55823	99.1708	1.74698	-11.4923	761.684		238_VU102-Y12	8	4	0.000976439	37.6268	-0.081843	3313.88	0.0266912	13.7164	2.18731	0.725258	36.1606	0.0502472	16.3945	0.325328	133.681	2.55823	99.1708	1.74698	-11.4923	761.684
239_VU102-Y12	8	4	0.00123822	0.23268	0	0.627525	11.1836	144.87	7.87017	96.7957	0.501187	1.15969	26.9439		239_VU102-Y12	8	4	0.00129965	28.6938	0.23268	1161.69	0.00762836	47.7659	0.627682	1.8057	11.5538	0.118087	17.8217	1.00697	144.87	7.87017	96.7957	0.501187	1.15969	26.9439
240_VU102-Y12	8	4	0.00140736	0.0338313	0	1.84463	31.9419	140.914	2.89572	98.6968	1.47326	23.4455	3753.67		240_VU102-Y12	8	4	0.00141629	28.7531	0.0338313	8005.11	0.0222402	16.4472	1.84465	0.730687	32.3637	0.0655684	17.3161	0.369704	140.914	2.89572	98.6968	1.47326	23.4455	3753.67
241_VU102-Y12	8	4	0.000904174	0.072077	0	0.73452	12.4017	137.527	6.55338	97.8648	0.586641	4.38203	329.246		241_VU102-Y12	8	4	0.000923202	41.8599	0.072077	3756.77	0.00847085	42.9555	0.734569	1.48927	12.6723	0.095572	16.8841	0.835139	137.527	6.55338	97.8648	0.586641	4.38203	329.246
243_VU102-Y12	8	4	0.00223397	0.0719577	0.000320294	1.18731	21.5084	147.162	4.25807	96.9878	0.948274	7.09507	534.672		243_VU102-Y12	8	4	0.00225315	14.6625	0.0719577	3767.91	0.0151198	24.0681	1.18736	1.02137	22.1764	0.0482854	18.1152	0.545495	147.162	4.25807	96.9878	0.948274	7.09507	534.672
221_VU102-Y12	8	4	0.00262326	-0.36922	0.00136135	3.61716	66.3052	148.844	2.0158	98.828	2.88892	-4.21261	74.3818		221_VU102-Y12	8	4	0.00252654	11.0772	-0.36922	882.847	0.0456596	8.17136	3.61691	0.568979	67.0915	0.0599647	18.3307	0.258479	148.844	2.0158	98.828	2.88892	-4.21261	74.3818
222_VU102-Y12	8	4	0.00338982	-0.30202	0.000448974	2.75828	47.393	139.864	2.30096	97.9044	2.20296	-3.92709	84.8484		222_VU102-Y12	8	4	0.00331034	9.01575	-0.30202	1080.3	0.0344907	10.7778	2.75808	0.625804	48.4074	0.0464992	17.1821	0.2936	139.864	2.30096	97.9044	2.20296	-3.92709	84.8484
223_VU102-Y12	8	4	0.000734311	-0.178314	0.00069548	2.04473	30.3646	121.497	2.71517	99.2775	1.63307	-4.93082	180.164		223_VU102-Y12	8	4	0.000687625	42.4844	-0.178314	1826.91	0.0255955	14.4358	2.04461	0.72121	30.5856	0.0668845	14.8502	0.342996	121.497	2.71517	99.2775	1.63307	-4.93082	180.164
224_VU102-Y12	8	4	0.00172461	-0.671971	0	2.52587	44.7611	144.083	2.4679	98.858	2.01734	-1.61633	15.6876		224_VU102-Y12	8	4	0.00154721	19.3065	-0.671971	485.284	0.0303226	12.1985	2.52542	0.643614	45.2782	0.0441819	17.7211	0.315628	144.083	2.4679	98.858	2.01734	-1.61633	15.6876
225_VU102-Y12	8	4	0.00350552	-0.490623	0	6.94867	101.64	119.731	1.35097	98.975	5.54971	-6.09007	80.8889		225_VU102-Y12	8	4	0.00337599	12.7258	-0.490623	664.104	0.0830517	4.63178	6.94834	0.507005	102.693	0.0428169	14.6273	0.170498	119.731	1.35097	98.975	5.54971	-6.09007	80.8889
231_VU102-Y12	8	4	0.00467026	0.0727286	0.00036186	3.63928	55.8566	125.435	1.80735	97.5592	2.9066	21.5169	1934.43		231_VU102-Y12	8	4	0.00468966	7.00669	0.0727286	4495.15	0.0453139	8.25576	3.63933	0.554289	57.254	0.031146	15.3482	0.228807	125.435	1.80735	97.5592	2.9066	21.5169	1934.43
232_VU102-Y12	8	4	0.00127761	0.0936639	0.000567458	2.54568	46.0914	147.088	2.54553	99.1745	2.03317	11.6869	814.922		232_VU102-Y12	8	4	0.00130265	26.5537	0.0936639	3486.47	0.0316365	11.677	2.54575	0.662046	46.4751	0.0552029	18.1057	0.326091	147.088	2.54553	99.1745	2.03317	11.6869	814.922
233_VU102-Y12	8	4	0.00302255	0.0993897	3.7748e-05	3.18925	59.391	151.116	2.34983	98.4988	2.54717	13.798	906.694		233_VU102-Y12	8	4	0.00304881	10.503	0.0993897	3285.6	0.0392293	9.46188	3.18932	0.660624	60.2961	0.0339267	18.6222	0.301683	151.116	2.34983	98.4988	2.54717	13.798	906.694
234_VU102-Y12	8	4	0.00556808	0.204049	0	3.33959	53.0368	129.64	1.96165	96.9557	2.66724	7.03765	225.454		234_VU102-Y12	8	4	0.00562195	7.22841	0.204049	1601.77	0.0407815	9.11456	3.33973	0.565344	54.7021	0.0420343	15.8812	0.248911	129.64	1.96165	96.9557	2.66724	7.03765	225.454
235_VU102-Y12	8	4	0.00501215	0.184161	0.000638289	5.46063	106.24	157.596	1.80153	98.6067	4.36125	12.7501	452.332		235_VU102-Y12	8	4	0.00506112	6.48456	0.184161	1773.84	0.0677112	5.5336	5.46075	0.534091	107.741	0.0405083	19.4557	0.232109	157.596	1.80153	98.6067	4.36125	12.7501	452.332
237_VU102-Y12	8	4	0.00325845	0.0228128	0.00164995	3.34288	56.2918	137.176	2.02342	98.2962	2.66987	63.0101	18083.5		237_VU102-Y12	8	4	0.00326539	10.6049	0.0228128	14349.7	0.0427465	8.68289	3.3429	0.578733	57.2676	0.0525868	16.8393	0.257807	137.176	2.02342	98.2962	2.66987	63.0101	18083.5
238_VU102-Y12	8	4	0.00224175	-0.365022	0	4.70796	79.63	137.761	1.66956	99.1615	3.76012	-5.54603	99.6822		238_VU102-Y12	8	4	0.00214538	14.1326	-0.365022	898.682	0.0573051	6.54177	4.70771	0.523376	80.3034	0.0349466	16.9139	0.21279	137.761	1.66956	99.1615	3.76012	-5.54603	99.6822
239_VU102-Y12	8	4	0.0069942	-0.137751	7.55202e-05	6.13154	108.243	143.555	1.62547	98.1027	4.89709	-19.1401	912.161		239_VU102-Y12	8	4	0.00695788	6.65677	-0.137751	2382.85	0.0756468	5.09165	6.13144	0.517764	110.337	0.0593511	17.6535	0.207827	143.555	1.62547	98.1027	4.89709	-19.1401	912.161
240_VU102-Y12	8	4	0.00308268	0.313678	0.000358207	0.633258	10.9031	140.141	8.26525	92.2115	0.505765	0.86809	18.133		240_VU102-Y12	8	4	0.0031657	13.2471	0.313678	1044.42	0.00860804	42.7531	0.633469	1.52124	11.824	0.124211	17.2174	1.0548	140.141	8.26525	92.2115	0.505765	0.86809	18.133
241_VU102-Y12	8	4	0.00190194	0.0688203	0	3.70899	59.9812	131.929	1.95617	99.057	2.96227	23.1744	2208.2		241_VU102-Y12	8	4	0.00192011	13.3299	0.0688203	4764.32	0.0446451	8.34862	3.70904	0.619632	60.5523	0.0322828	16.1718	0.248527	131.929	1.95617	99.057	2.96227	23.1744	2208.2
187_VU102-Y12	9	4	0.00289538	-2.11491	0	5.52109	108.805	159.547	3.74805	99.2075	4.40954	-1.12254	0.765542		187_VU102-Y12	9	4	0.00233705	7.76981	-2.11491	34.0695	0.0653599	2.09142	5.51966	0.999381	109.674	0.0273028	19.7072	0.483415	159.547	3.74805	99.2075	4.40954	-1.12254	0.765542
188_VU102-Y12	9	4	0.00253375	-2.90887	0	2.38605	48.1511	163.211	3.97515	98.4491	1.90567	-0.352715	0.183009		188_VU102-Y12	9	4	0.00176581	12.2197	-2.90887	25.9027	0.028823	2.38492	2.38409	1.04281	48.9096	0.0300761	20.1803	0.513733	163.211	3.97515	98.4491	1.90567	-0.352715	0.183009
189_VU102-Y12	9	4	0.00882763	-1.26374	0	4.47466	517.815	784.224	15.6469	99.4929	3.57379	-1.52255	1.77501		189_VU102-Y12	9	4	0.00849401	4.99307	-1.26374	58.2735	0.0542768	2.2111	4.47381	1.00165	520.455	0.0158054	115.722	2.83838	784.224	15.6469	99.4929	3.57379	-1.52255	1.77501
190_VU102-Y12	9	4	0.00232381	-0.566295	0	3.04482	53.8963	143.926	3.48688	98.7243	2.43181	-2.31199	5.37189		190_VU102-Y12	9	4	0.0021743	12.6432	-0.566295	116.166	0.0358576	2.1881	3.04443	1.02611	54.5927	0.0342375	17.701	0.44591	143.926	3.48688	98.7243	2.43181	-2.31199	5.37189
191_VU102-Y12	9	4	0.00218681	-1.85364	0	5.7977	106.638	149.331	3.49974	99.3869	4.63046	-1.34493	0.861939		191_VU102-Y12	9	4	0.00169745	13.0565	-1.85364	32.0131	0.0689019	2.02602	5.79645	0.991442	107.296	0.024336	18.3932	0.448878	149.331	3.49974	99.3869	4.63046	-1.34493	0.861939
193_VU102-Y12	9	4	0.00268711	-2.01816	0	3.06982	58.7034	155.01	3.7482	98.6474	2.45178	-0.654072	0.366044		193_VU102-Y12	9	4	0.00215432	13.9216	-2.01816	27.9451	0.0371363	2.09738	3.06846	1.02935	59.5083	0.0451672	19.1228	0.482238	155.01	3.7482	98.6474	2.45178	-0.654072	0.366044
194_VU102-Y12	9	4	0.00149268	-1.69751	0	4.97747	90.1061	147.065	3.45878	99.5031	3.97537	-1.26085	0.783009		194_VU102-Y12	9	4	0.00104453	29.2812	-1.69751	31.0188	0.0589723	2.05974	4.97633	0.992463	90.556	0.0255174	18.1028	0.443076	147.065	3.45878	99.5031	3.97537	-1.26085	0.783009
195_VU102-Y12	9	4	0.00242991	-1.17784	0	2.83202	55.1965	157.863	3.87337	98.6984	2.26186	-1.0339	1.29289		195_VU102-Y12	9	4	0.00211896	15.6015	-1.17784	62.5085	0.0345428	2.13035	2.83123	1.04688	55.9244	0.0288103	19.4901	0.499119	157.863	3.87337	98.6984	2.26186	-1.0339	1.29289
196_VU102-Y12	9	4	0.00162883	-0.911657	0	3.34833	393.405	793.962	16.0115	99.8758	2.67422	-1.57931	2.73878		196_VU102-Y12	9	4	0.00138816	21.4184	-0.911657	86.6967	0.0395102	2.32223	3.34772	1.02136	393.894	0.0176341	117.493	2.92	793.962	16.0115	99.8758	2.67422	-1.57931	2.73878
199_VU102-Y12	9	4	0.00488251	-1.73793	0	4.1073	77.5833	153.193	3.65723	98.1514	3.28039	-1.01623	0.5707		199_VU102-Y12	9	4	0.0044237	7.5346	-1.73793	28.0431	0.0503391	2.26625	4.10613	1.01449	79.0445	0.0253427	18.8891	0.470067	153.193	3.65723	98.1514	3.28039	-1.01623	0.5707
200_VU102-Y12	9	4	0.00279787	-0.765737	0	6.83606	118.829	141.435	3.32833	99.2971	5.45977	-3.8388	7.06351		200_VU102-Y12	9	4	0.00259571	15.1234	-0.765737	91.9909	0.0802852	2.12704	6.83555	0.991163	119.67	0.0253625	17.3826	0.425056	141.435	3.32833	99.2971	5.45977	-3.8388	7.06351
		S	0.113238	-18.1851	0.00731703	125.208	2973.51										S	0.108441	1.98539	-18.1851	89.9093	1.51945	1.33344	125.196	0.143177	3007.43	0.00625319
Information on Analysis				Results		40(r)/39(k)	± 2s	Age	± 2s	MSWD	39Ar(k)	K/Ca	± 2s		Information on Analysis and Constants Used in Calculations									Results		40(a)/36(a)	± 2s	40(r)/39(k)	± 2s	Age	± 2s	MSWD	39Ar(k)	K/Ca	± 2s
								(Ma)			(%,n)																			(Ma)			(%,n)
Sample =P6(Y12)				Age Plateau Error Mean		17.173	0.930603	139.793	7.41661	318.37	100	-0.558348	0.147127		Sample =P6(Y12)				Age Equations = Conventional					Age Plateau Error Mean				17.173	0.930603	139.793	7.41661	318.37	100	-0.558348	0.147127
Material = muscovite							0.0541898		0.0530543	0	40				Material = muscovite				Negative Intensities = Allowed										0.0541898		0.0530543	0	40
Location = China				Minimal External Error					7.90557	1.45291	2σ Confidence Limit				Location = China				Decay Constant 40K = 5.460 ± 0.053 E-10 1/a					Minimal External Error							7.90557	1.45291	2σ Confidence Limit
Analyst = Xilin Sun				Analytical Error					7.29346	17.8429	Error Magnification				Analyst = Xilin Sun				Decay Constant 39Ar = 2.940 ± 0.016 E-07 1/h					Analytical Error							7.29346	17.8429	Error Magnification
Project = VU102															Project = VU102				Decay Constant 37Ar = 8.230 ± 0.012 E-04 1/h
Mass Discrimination Law = EXP				Total Fusion Age		23.7486	0.0820633	190.616	1.91536		40	-2.96063	5.32379		Mass Discrimination Law = EXP				Decay Constant 36Cl = 2.257 ± 0.015 E-06 1/a					Total Fusion Age				23.7486	0.0820633	190.616	1.91536		40	-2.96063	5.32379
Irradiation = VU102							0.0034555		0.0100482						Irradiation = VU102				Atmospheric Ratio 40/36(a) = 298.56 ± 0.31										0.0034555		0.0100482
J = 0.00461860 ± 0.00002309				Minimal External Error					4.19504						J = 0.00461860 ± 0.00002309				Atmospheric Ratio 38/36(a) = 0.1885 ± 0.0003					Minimal External Error							4.19504
DRA = 25.520 ± 0.08 Ma				Analytical Error					0.625557						DRA = 25.520 ± 0.08 Ma				Production Ratio 39/37(ca) = 0.000673 ± 0.000004					Analytical Error							0.625557
															IGSN = Undefined				Production Ratio 36/37(ca) = 0.000264 ± 0.000002
															Preferred Age = Undefined				Production Ratio 40/39(k) = 0.000860 ± 0.000070					Normal Isochron No Convergence		-1382.44	1737.42	21.0232	1.88511	169.722	14.6249	24.4181	80.6572
															Classification = Undefined				Production Ratio 38/39(k) = 0.012110 ± 0.000030								1.25678		0.0896679		0.0861695	1.97571e-108	26
															Experiment Type = Undefined				Production Ratio 36/38(cl) = 262.80 ± 1.71					Minimal External Error							14.9977	1.57735	2σ Confidence Limit
															Extraction Method = Undefined				Scaling Ratio K/Ca = 0.430					Analytical Error							14.5348	4.94146	Error Magnification
															Heating = 8 sec																100		Number of Iterations
															Isolation = 8.00 min																0.00328382		Convergence
															Instrument = HELIX
															Lithology = Undefined									Inverse Isochron Error Chron		147122	116721	-68.1973	60.2775	-692.86	744.38	11.4349	80.6572
															Lat-Lon = Undefined - Undefined												0.793365		0.883868		1.07436	2.25324e-44	26
															Feature = Undefined									Minimal External Error							744.504	1.57735	2σ Confidence Limit
																								Analytical Error							744.333	3.38156	Error Magnification
																															5		Number of Iterations
																															0.00359216		Convergence
																															4.03514		Spreading Factor

## Sheet: P7(Helix)
VUA Helix MC
Total fusion			36Ar(a) [fA]	37Ar(ca) [fA]	38Ar(cl) [fA]	39Ar(k) [fA]	40Ar(r) [fA]	Age	± 2s	40Ar(r)	39Ar(k)	K/Ca	± 2s			Relative Abundances			36Ar(a) [fA]	%1s	37Ar(ca) [fA]	%1s	38Ar(cl) [fA]	%1s	39Ar(k) [fA]	%1s	40Ar(r) [fA]	%1s	40(r)/39(k)	± 2s	Age	± 2s	40Ar(r)	39Ar(k)	K/Ca	± 2s
								(Ma)		(%)	(%)																				(Ma)		(%)	(%)
209_VU102-Y13	8	4	0.00020857	-0.00555562	0	1.0902	19.2236	143.395	4.09375	99.6723	0.131437	-84.3807	81523.4		209_VU102-Y13	8	4	0.000207104	117.134	-0.00555562	48306.9	0.0128728	28.2859	1.0902	0.903212	19.2868	0.0796506	17.6331	0.523367	143.395	4.09375	99.6723	0.131437	-84.3807	81523.4
244_VU102-Y13	8	4	0.00294544	-0.193058	0	4.81221	615.6	850.288	7.31855	99.8567	0.580171	-10.7183	300.679		244_VU102-Y13	8	4	0.00289447	12.3354	-0.193058	1402.64	0.0586918	6.28259	4.81208	0.535198	616.484	0.00639515	127.924	1.37636	850.288	7.31855	99.8567	0.580171	-10.7183	300.679
245_VU102-Y13	8	4	0.0150106	0.139197	5.24942e-05	34.3092	526.038	125.309	1.18228	99.1497	4.13639	105.986	4127.82		245_VU102-Y13	8	4	0.0150474	3.31627	0.139197	1947.34	0.418366	1.33034	34.3093	0.485471	530.549	0.00669769	15.3323	0.149664	125.309	1.18228	99.1497	4.13639	105.986	4127.82
246_VU102-Y13	8	4	0.00309549	-0.229838	0	3.23682	61.8342	154.859	2.10485	98.523	0.390239	-6.05572	142.69		246_VU102-Y13	8	4	0.00303482	8.93099	-0.229838	1178.15	0.0396188	9.29934	3.23667	0.600561	62.7611	0.0465182	19.1034	0.270785	154.859	2.10485	98.523	0.390239	-6.05572	142.69
247_VU102-Y13	8	4	0.00340392	0.0257539	0	7.39207	117.558	129.814	1.41735	99.1376	0.891204	123.422	26001.7		247_VU102-Y13	8	4	0.00341072	12.0663	0.0257539	10533.7	0.0887219	4.28809	7.39209	0.524121	118.58	0.0212057	15.9032	0.179863	129.814	1.41735	99.1376	0.891204	123.422	26001.7
249_VU102-Y13	8	4	0.0275498	-0.107481	0	4.72983	396.708	599.663	5.59383	97.9677	0.570239	-18.9226	955.911		249_VU102-Y13	8	4	0.0275214	2.41495	-0.107481	2525.84	0.0617883	6.05003	4.72976	0.540393	404.937	0.0141259	83.8736	0.917459	599.663	5.59383	97.9677	0.570239	-18.9226	955.911
250_VU102-Y13	8	4	0.0132752	-0.278577	0	10.3165	259.998	201.664	1.96088	98.4952	1.24378	-15.9241	310.375		250_VU102-Y13	8	4	0.0132016	3.04501	-0.278577	974.546	0.126425	3.18692	10.3163	0.504035	263.97	0.018443	25.2022	0.258793	201.664	1.96088	98.4952	1.24378	-15.9241	310.375
251_VU102-Y13	8	4	0.00493213	-0.387519	0	3.48912	383.563	752.021	7.58574	99.6168	0.420656	-3.8716	54.3679		251_VU102-Y13	8	4	0.00482982	9.43231	-0.387519	702.137	0.0428596	8.57069	3.48886	0.60906	385.038	0.012188	109.931	1.35208	752.021	7.58574	99.6168	0.420656	-3.8716	54.3679
252_VU102-Y13	8	4	0.0059557	0.0417919	0	3.7679	98.1127	207.993	2.35892	98.2167	0.454267	38.7682	5042.12		252_VU102-Y13	8	4	0.00596673	7.7581	0.0417919	6502.9	0.0462829	7.96116	3.76793	0.537991	99.8941	0.0228568	26.0391	0.312404	207.993	2.35892	98.2167	0.454267	38.7682	5042.12
253_VU102-Y13	8	4	0.00403737	-0.0789561	5.75879e-05	1.74663	45.8951	209.785	3.91774	97.4377	0.210577	-9.51225	656.636		253_VU102-Y13	8	4	0.00401656	8.39008	-0.0789561	3451.53	0.0219703	16.6229	1.74658	0.835073	47.102	0.0337287	26.2764	0.519354	209.785	3.91774	97.4377	0.210577	-9.51225	656.636
255_VU102-Y13	8	4	0.00231998	-0.218874	7.61644e-05	2.20919	35.4235	130.849	2.44619	98.077	0.266345	-4.34017	107.846		255_VU102-Y13	8	4	0.00226223	14.166	-0.218874	1242.41	0.0272668	13.3797	2.20904	0.699211	36.1181	0.0561391	16.0346	0.310598	130.849	2.44619	98.077	0.266345	-4.34017	107.846
256_VU102-Y13	8	4	0.0190463	-0.457337	0	15.5599	1684.68	742.681	5.96294	99.6628	1.87594	-14.6298	174.015		256_VU102-Y13	8	4	0.0189255	3.16864	-0.457337	594.725	0.191642	2.22065	15.5596	0.487853	1690.38	0.00766224	108.27	1.05743	742.681	5.96294	99.6628	1.87594	-14.6298	174.015
257_VU102-Y13	8	4	0.0080217	-0.287111	0	18.6056	350.541	152.816	1.44042	99.3169	2.24313	-27.8652	528.252		257_VU102-Y13	8	4	0.0079459	4.62775	-0.287111	947.871	0.222199	1.96281	18.6054	0.486137	352.952	0.0124103	18.8406	0.1851	152.816	1.44042	99.3169	2.24313	-27.8652	528.252
258_VU102-Y13	8	4	0.00536635	-0.296933	0	3.06132	303.775	690.978	7.31552	99.4745	0.369079	-4.43321	81.4192		258_VU102-Y13	8	4	0.00528796	9.57812	-0.296933	918.288	0.0376957	9.73694	3.06112	0.626601	305.379	0.013395	99.23	1.26118	690.978	7.31552	99.4745	0.369079	-4.43321	81.4192
259_VU102-Y13	8	4	0.0247304	-0.0207777	0.000744347	5.10602	601.49	795.647	6.84734	98.7866	0.615593	-105.67	27675.9		259_VU102-Y13	8	4	0.0247253	2.79364	-0.0207777	13095.4	0.0672399	5.55851	5.10601	0.526919	608.878	0.00810453	117.8	1.24989	795.647	6.84734	98.7866	0.615593	-105.67	27675.9
35_VU102-Y13	8	4	0.0134283	0.090867	0.00048885	41.5517	625.171	123.043	1.18747	99.3572	5.00957	196.631	39708.7		35_VU102-Y13	8	4	0.0134526	3.18941	0.090867	10097.3	0.506211	1.21709	41.5518	0.484595	629.216	0.00888932	15.0456	0.150135	123.043	1.18747	99.3572	5.00957	196.631	39708.7
36_VU102-Y13	8	4	0.00812745	-0.80236	0	34.8387	595.207	139.1	1.33733	99.589	4.20024	-18.6707	427.34		36_VU102-Y13	8	4	0.00791562	4.22458	-0.80236	1144.41	0.416702	1.33237	34.8382	0.483471	597.663	0.00860729	17.0846	0.17057	139.1	1.33733	99.589	4.20024	-18.6707	427.34
37_VU102-Y13	8	4	0.0171187	1.02908	0.000296523	19.3074	282.91	119.935	1.28265	98.2198	2.32774	8.06753	143.732		37_VU102-Y13	8	4	0.0173906	2.61258	1.02908	890.805	0.237336	1.85301	19.3081	0.486235	288.037	0.0131561	14.6529	0.161893	119.935	1.28265	98.2198	2.32774	8.06753	143.732
38_VU102-Y13	8	4	0.0135356	-0.880303	0.000838841	18.1099	1988.97	751.44	6.06394	99.7965	2.18337	-8.84612	184.427		38_VU102-Y13	8	4	0.0133038	4.14782	-0.880303	1042.42	0.222701	1.94599	18.1093	0.489273	1993.02	0.00663255	109.827	1.08049	751.44	6.06394	99.7965	2.18337	-8.84612	184.427
41_VU102-Y13	8	4	0.0166973	0.0253796	0	29.3364	474.792	132.028	1.30028	98.9557	3.53686	497.04	359498		41_VU102-Y13	8	4	0.016704	3.21555	0.0253796	36163.9	0.352341	1.45879	29.3364	0.485365	479.802	0.0106511	16.1844	0.165207	132.028	1.30028	98.9557	3.53686	497.04	359498
42_VU102-Y13	8	4	0.0131511	-0.382469	0	26.7413	443.968	135.314	1.33777	99.1183	3.224	-30.0646	1443.61		42_VU102-Y13	8	4	0.0130501	4.54634	-0.382469	2400.85	0.319413	1.5492	26.7411	0.48392	447.917	0.00940289	16.6023	0.170274	135.314	1.33777	99.1183	3.224	-30.0646	1443.61
43_VU102-Y13	8	4	0.0242059	0.581614	0	22.4953	583.012	207.072	1.97039	98.7724	2.71208	16.6313	525.348		43_VU102-Y13	8	4	0.0243594	3.13119	0.581614	1579.4	0.273177	1.68074	22.4957	0.485098	590.258	0.012267	25.9171	0.260818	207.072	1.97039	98.7724	2.71208	16.6313	525.348
44_VU102-Y13	8	4	0.0719296	0.600574	0	37.7256	981.918	207.909	1.9353	97.8566	4.54828	27.0108	825.785		44_VU102-Y13	8	4	0.0720882	2.16871	0.600574	1528.62	0.470234	1.27603	37.726	0.484078	1003.43	0.00956717	26.0279	0.25629	207.909	1.9353	97.8566	4.54828	27.0108	825.785
45_VU102-Y13	8	4	0.0325427	0.455475	0	25.843	87.8504	28.5319	0.562594	90.0212	3.11569	24.3976	984.319		45_VU102-Y13	8	4	0.032663	2.34929	0.455475	2017.25	0.314733	1.54946	25.8433	0.487399	97.5885	0.0336277	3.39939	0.0675528	28.5319	0.562594	90.0212	3.11569	24.3976	984.319
243_VU102-Y13	8	4	0.00809393	-0.460852	0.00113391	4.82372	141.022	231.968	2.67242	98.3124	0.581558	-4.50079	64.1042		243_VU102-Y13	8	4	0.0079729	7.75123	-0.460852	712.143	0.0610749	6.16635	4.82341	0.568172	143.442	0.0212535	29.235	0.358585	231.968	2.67242	98.3124	0.581558	-4.50079	64.1042
244_VU102-Y13	8	4	0.00394125	0.163488	0	4.95699	485.678	683.703	6.3011	99.7574	0.597626	13.0377	523.025		244_VU102-Y13	8	4	0.00398441	9.62703	0.163488	2005.81	0.060266	6.2141	4.9571	0.547041	486.859	0.0154122	97.9784	1.08199	683.703	6.3011	99.7574	0.597626	13.0377	523.025
245_VU102-Y13	8	4	0.0034475	-0.266256	0	20.9214	376.228	146.129	1.38118	99.7224	2.52233	-33.7877	832.374		245_VU102-Y13	8	4	0.0033772	11.7102	-0.266256	1231.77	0.25276	1.80643	20.9212	0.485606	377.275	0.0114949	17.9829	0.176841	146.129	1.38118	99.7224	2.52233	-33.7877	832.374
246_VU102-Y13	8	4	0.00769931	-0.112019	0	8.50601	135.394	129.926	1.3612	98.3253	1.0255	-32.6515	1912.53		246_VU102-Y13	8	4	0.00766974	5.63221	-0.112019	2928.7	0.103077	3.75823	8.50594	0.497965	137.7	0.0159525	15.9175	0.172748	129.926	1.3612	98.3253	1.0255	-32.6515	1912.53
247_VU102-Y13	8	4	0.0128069	-0.258924	0.000635148	18.0495	2013.32	761.05	6.07238	99.8097	2.17609	-29.9751	760.621		247_VU102-Y13	8	4	0.0127389	4.66221	-0.258924	1268.75	0.221629	1.98968	18.0493	0.487107	2017.16	0.00722875	111.544	1.08769	761.05	6.07238	99.8097	2.17609	-29.9751	760.621
249_VU102-Y13	8	4	0.00887997	0.467733	0	16.4476	247.427	123.025	1.19003	98.9343	1.98296	15.1207	212.415		249_VU102-Y13	8	4	0.00900345	4.66757	0.467733	702.396	0.199185	2.10501	16.4479	0.486074	250.092	0.00961755	15.0433	0.150457	123.025	1.19003	98.9343	1.98296	15.1207	212.415
250_VU102-Y13	8	4	0.00725301	0.260347	0	9.70141	145.158	122.386	1.27853	98.5246	1.16962	16.0232	404.337		250_VU102-Y13	8	4	0.00732174	6.92243	0.260347	1261.72	0.118004	3.32326	9.70158	0.497131	147.332	0.0344991	14.9626	0.161589	122.386	1.27853	98.5246	1.16962	16.0232	404.337
251_VU102-Y13	8	4	0.00143272	0.00533302	0.000105876	2.62862	41.1744	127.927	2.3266	98.9664	0.316913	211.945	261354		251_VU102-Y13	8	4	0.00143419	28.6519	0.00533302	61656	0.0322086	11.4807	2.62863	0.614511	41.6044	0.127836	15.6639	0.294944	127.927	2.3266	98.9664	0.316913	211.945	261354
252_VU102-Y13	8	4	0.00775971	-0.188493	0	12.5237	196.778	128.31	1.2723	98.831	1.50988	-28.5697	996.415		252_VU102-Y13	8	4	0.00770994	5.69778	-0.188493	1743.83	0.152214	2.6544	12.5236	0.49108	199.106	0.0170018	15.7125	0.161324	128.31	1.2723	98.831	1.50988	-28.5697	996.415
253_VU102-Y13	8	4	0.0426851	0.365641	0.0026498	24.3629	2180.15	633.57	5.21447	99.4179	2.93724	28.6511	514.744		253_VU102-Y13	8	4	0.0427831	2.32828	0.365641	898.295	0.30573	1.57855	24.3631	0.486323	2192.92	0.00608201	89.4866	0.871219	633.57	5.21447	99.4179	2.93724	28.6511	514.744
255_VU102-Y13	8	4	0.0112018	-0.198653	0	26.974	101.408	31.5284	0.35219	96.7859	3.25205	-58.3873	1933.44		255_VU102-Y13	8	4	0.0111494	4.09411	-0.198653	1655.7	0.324657	1.513	26.9739	0.482832	104.776	0.0263372	3.75948	0.042358	31.5284	0.35219	96.7859	3.25205	-58.3873	1933.44
256_VU102-Y13	8	4	0.0214743	0.0339271	0	35.3085	563.131	130.173	1.21995	98.869	4.25688	447.508	86819.8		256_VU102-Y13	8	4	0.0214833	2.8444	0.0339271	9700.35	0.430832	1.32357	35.3086	0.482034	569.573	0.00868295	15.9489	0.154843	130.173	1.21995	98.869	4.25688	447.508	86819.8
257_VU102-Y13	8	4	0.00427646	-0.149504	0.000828491	11.271	168.805	122.5	1.26033	99.2437	1.35886	-32.4172	1430.21		257_VU102-Y13	8	4	0.00423745	13.911	-0.149504	2205.94	0.138126	2.92424	11.2709	0.497297	170.091	0.023374	14.9769	0.159299	122.5	1.26033	99.2437	1.35886	-32.4172	1430.21
258_VU102-Y13	8	4	0.00272369	-0.444201	0.00136028	7.10063	123.516	141.533	1.51308	99.3411	0.856068	-6.87363	101.971		258_VU102-Y13	8	4	0.00260718	14.0851	-0.444201	741.756	0.0878624	4.33922	7.10034	0.504752	124.336	0.0265123	17.3951	0.193244	141.533	1.51308	99.3411	0.856068	-6.87363	101.971
259_VU102-Y13	8	4	0.0132715	-0.154844	0	7.46733	687.679	649.097	5.53307	99.4262	0.900278	-20.7367	883.667		259_VU102-Y13	8	4	0.0132307	4.23994	-0.154844	2130.69	0.0925449	4.07819	7.46722	0.503241	691.648	0.00875292	92.0918	0.932321	649.097	5.53307	99.4262	0.900278	-20.7367	883.667
74_VU102-Y13	8	4	0.00219591	-1.04486	0	17.1287	49.8893	24.4735	0.429311	98.6742	2.06507	-7.0491	6.03299		74_VU102-Y13	8	4	0.00192006	17.5091	-1.04486	42.7782	0.204615	0.989387	17.128	0.482999	50.5597	0.0293099	2.91262	0.0514348	24.4735	0.429311	98.6742	2.06507	-7.0491	6.03299
75_VU102-Y13	8	4	0.00703083	-1.06289	0	7.57313	228.526	238.967	3.85635	99.087	0.913034	-3.06378	2.92711		75_VU102-Y13	8	4	0.00675023	3.75441	-1.06289	47.7566	0.090991	1.03121	7.57242	0.488882	230.632	0.0187668	30.1759	0.519426	238.967	3.85635	99.087	0.913034	-3.06378	2.92711
76_VU102-Y13	8	4	0.00704738	-1.27026	0	20.6462	441.577	172.532	2.8252	99.5218	2.48915	-6.98902	5.95379		76_VU102-Y13	8	4	0.00671204	5.24033	-1.27026	42.5793	0.248612	0.972406	20.6453	0.484087	443.699	0.0321354	21.3879	0.366981	172.532	2.8252	99.5218	2.48915	-6.98902	5.95379
82_VU102-Y13	8	4	0.0375989	-0.909671	0	23.4794	646.2	219.157	3.54347	98.2895	2.83072	-11.0987	12.779		82_VU102-Y13	8	4	0.0373587	2.05739	-0.909671	57.5593	0.284534	0.992307	23.4787	0.483978	657.446	0.0149252	27.522	0.472149	219.157	3.54347	98.2895	2.83072	-11.0987	12.779
83_VU102-Y13	8	4	0.0225543	-0.571183	2.87033e-05	23.0328	2605.32	769.788	10.7609	99.7414	2.77689	-17.3397	27.483		83_VU102-Y13	8	4	0.0224035	2.74246	-0.571183	79.2412	0.283208	1.00968	23.0325	0.482371	2612.07	0.0131372	113.113	1.93672	769.788	10.7609	99.7414	2.77689	-17.3397	27.483
84_VU102-Y13	8	4	0.0083685	-0.507345	0	25.1611	404.611	131.213	2.16769	99.381	3.03348	-21.3253	37.7885		84_VU102-Y13	8	4	0.00823456	3.8283	-0.507345	88.5933	0.305151	0.971047	25.1607	0.481475	407.131	0.0153768	16.0808	0.275291	131.213	2.16769	99.381	3.03348	-21.3253	37.7885
85_VU102-Y13	8	4	0.0139818	-1.57172	0	22.4314	618.405	219.507	3.54582	99.3264	2.70438	-6.13692	4.0259		85_VU102-Y13	8	4	0.0135669	2.6442	-1.57172	32.7819	0.273716	0.98609	22.4304	0.483682	622.599	0.0157419	27.5687	0.472552	219.507	3.54582	99.3264	2.70438	-6.13692	4.0259
87_VU102-Y13	8	4	0.0223043	-1.15554	0	21.412	2417.95	768.741	10.7565	99.7246	2.58148	-7.96787	5.43313		87_VU102-Y13	8	4	0.0219992	3.0256	-1.15554	34.0759	0.260646	0.979239	21.4112	0.483393	2424.63	0.0135294	112.925	1.93482	768.741	10.7565	99.7246	2.58148	-7.96787	5.43313
88_VU102-Y13	8	4	0.00748422	-0.710339	0.000888498	5.02514	508.673	702.517	10.1018	99.5618	0.605843	-3.04194	3.32667		88_VU102-Y13	8	4	0.00729724	4.58619	-0.710339	54.6687	0.0631538	1.02852	5.02466	0.49873	510.912	0.0147929	101.226	1.75252	702.517	10.1018	99.5618	0.605843	-3.04194	3.32667
89_VU102-Y13	8	4	0.016363	-0.902509	0	13.0567	1701.23	862.853	11.7998	99.713	1.57414	-6.22085	5.13788		89_VU102-Y13	8	4	0.0161248	3.22756	-0.902509	41.2807	0.160768	1.04866	13.0561	0.48467	1706.13	0.0147519	130.296	2.2344	862.853	11.7998	99.713	1.57414	-6.22085	5.13788
90_VU102-Y13	8	4	0.00752508	-0.822304	0	14.5148	6.28034	3.65641	0.158201	73.5445	1.74994	-7.59011	6.98914		90_VU102-Y13	8	4	0.007308	5.54681	-0.822304	46.0277	0.174035	0.98402	14.5143	0.485368	8.53951	0.0838822	0.432684	0.0187395	3.65641	0.158201	73.5445	1.74994	-7.59011	6.98914
92_VU102-Y13	8	4	0.00630634	-0.945403	0	22.1098	376.362	138.612	2.28637	99.4972	2.66561	-10.0563	10.0632		92_VU102-Y13	8	4	0.00605675	3.98886	-0.945403	50.0219	0.267271	1.00804	22.1092	0.482357	378.264	0.0140793	17.0224	0.29154	138.612	2.28637	99.4972	2.66561	-10.0563	10.0632
93_VU102-Y13	8	4	0.0126519	-0.492323	0	2.61149	297.496	774.253	11.1886	98.7455	0.314847	-2.2809	3.3433		93_VU102-Y13	8	4	0.0125219	2.89416	-0.492323	73.2801	0.0330717	1.27274	2.61116	0.532228	301.275	0.0168427	113.918	2.01861	774.253	11.1886	98.7455	0.314847	-2.2809	3.3433
94_VU102-Y13	8	4	0.00907985	-0.53543	0	7.00374	808.552	782.703	10.9586	99.6651	0.844386	-5.62465	8.21192		94_VU102-Y13	8	4	0.0089385	4.46838	-0.53543	72.9909	0.0862331	1.08084	7.00338	0.489502	811.269	0.0142923	115.446	1.98626	782.703	10.9586	99.6651	0.844386	-5.62465	8.21192
95_VU102-Y13	8	4	0.0266618	-0.865966	0	17.8355	536.421	238.225	3.83109	98.535	2.15029	-8.8563	9.05311		95_VU102-Y13	8	4	0.0264332	2.37404	-0.865966	51.099	0.219448	0.987566	17.8349	0.483638	544.397	0.0131563	30.0761	0.515815	238.225	3.83109	98.535	2.15029	-8.8563	9.05311
		S	0.714737	-15.9424	0.0101855	829.447	30818.6										S	0.710534	0.559991	-15.9424	201.703	10.1121	0.282023	829.436	0.0803452	31032.7	0.00230049
Information on Analysis				Results		40(r)/39(k)	± 2s	Age	± 2s	MSWD	39Ar(k)	K/Ca	± 2s		Information on Analysis and Constants Used in Calculations									Results		40(a)/36(a)	± 2s	40(r)/39(k)	± 2s	Age	± 2s	MSWD	39Ar(k)	K/Ca	± 2s
								(Ma)			(%,n)																			(Ma)			(%,n)
Sample = Pan7(Y13)				Age Plateau Error Mean		4.02621	2.13591	33.7449	17.7409	21691.5	100	-4.8308	1.34551		Sample = Pan7(Y13)				Age Equations = Conventional					Age Plateau Error Mean				4.02621	2.13591	33.7449	17.7409	21691.5	100	-4.8308	1.34551
Material = muscovite							0.5305		0.525736	0	54				Material = muscovite				Negative Intensities = Allowed										0.5305		0.525736	0	54
Location = China				Minimal External Error					17.7532	1.38851	2σ Confidence Limit				Location = China				Decay Constant 40K = 5.460 ± 0.053 E-10 1/a					Minimal External Error							17.7532	1.38851	2σ Confidence Limit
Analyst = Xilin Sun				Analytical Error					17.7377	147.28	Error Magnification				Analyst = Xilin Sun				Decay Constant 39Ar = 2.940 ± 0.016 E-07 1/h					Analytical Error							17.7377	147.28	Error Magnification
Project = VU102															Project = VU102				Decay Constant 37Ar = 8.230 ± 0.012 E-04 1/h
Mass Discrimination Law = EXP				Total Fusion Age		37.1556	0.074245	290.066	2.73566		54	-22.3719	90.2496		Mass Discrimination Law = EXP				Decay Constant 36Cl = 2.257 ± 0.015 E-06 1/a					Total Fusion Age				37.1556	0.074245	290.066	2.73566		54	-22.3719	90.2496
Irradiation = VU102							0.00199822		0.00943115						Irradiation = VU102				Atmospheric Ratio 40/36(a) = 298.56 ± 0.31										0.00199822		0.00943115
J = 0.00461860 ± 0.00002309				Minimal External Error					6.30401						J = 0.00461860 ± 0.00002309				Atmospheric Ratio 38/36(a) = 0.1885 ± 0.0003					Minimal External Error							6.30401
DRA = 25.520 ± 0.08Ma				Analytical Error					0.536047						DRA = 25.520 ± 0.08 Ma				Production Ratio 39/37(ca) = 0.000673 ± 0.000004					Analytical Error							0.536047
															IGSN = Undefined				Production Ratio 36/37(ca) = 0.000264 ± 0.000002
															Preferred Age = Undefined				Production Ratio 40/39(k) = 0.000860 ± 0.000070					Normal Isochron Error Chron		52488.3	17549.3	-41.9146	22.894	-394.064	240.189	> 100	85.601
															Classification = Undefined				Production Ratio 38/39(k) = 0.012110 ± 0.000030								0.334346		0.546205		0.609519	0	39
															Experiment Type = Undefined				Production Ratio 36/38(cl) = 262.80 ± 1.71					Minimal External Error							240.313	1.46499	2σ Confidence Limit
															Extraction Method = Undefined				Scaling Ratio K/Ca = 0.430					Analytical Error							240.149	> 10	Error Magnification
															Heating = 8 sec																13		Number of Iterations
															Isolation = 8.00 min																0.000331496		Convergence
															Instrument = HELIX
															Lithology = Undefined									Inverse Isochron Error Chron		127321	55676.3	-42.204	23.079	-397.103	242.533	> 100	85.601
															Lat-Lon = Undefined - Undefined												0.437291		0.546845		0.610757	0	39
															Feature = Undefined									Minimal External Error							242.658	1.46499	2σ Confidence Limit
																								Analytical Error							242.493	> 10	Error Magnification
																															5		Number of Iterations
																															0.0130357		Convergence
																															71.5174		Spreading Factor

[truncated: 8 more sheets: JC4, JC2, JC1, SG(AGES), Longchuan R (LCJ) , SG(Helix), JC3(Helix), YB(Yangbi R)]
